# Supplementary material for: Extracellular vesicles from the microalga Tetraselmis chuii are biocompatible and exhibit unique bone tropism along with antioxidant and anti-inflammatory properties
Source: PubMed Central journal article supplement — Commun Biol. 2024 Aug 3;7:941. doi: 10.1038/s42003-024-06612-9 (PMC11297973; doi:10.1038/s42003-024-06612-9), 2024-08-03
Supplement: 42003_2024_6612_MOESM3_ESM.pdf [file 42003_2024_6612_MOESM3_ESM.pdf]

## **Description of Additional Supplementary Files**

File name: Supplementary Data 1

Description: Data related to Figures 1-8

File name: Supplementary Data 2

Description: Data related to Supplementary Figures 1-10
