# Supplementary material for: Extracellular vesicles from the microalga Tetraselmis chuii are biocompatible and exhibit unique bone tropism along with antioxidant and anti-inflammatory properties
Source: PubMed Central journal article supplement — Commun Biol. 2024 Aug 3;7:941. doi: 10.1038/s42003-024-06612-9 (PMC11297973; doi:10.1038/s42003-024-06612-9), 2024-08-03
Supplement: 42003_2024_6612_MOESM4_ESM.pdf [file 42003_2024_6612_MOESM4_ESM.pdf]

**Figure 1 a (NTA)**

| size (nm) | Concentration (particles / ml) | Concentration average | Standard Error |
|-----------|--------------------------------|--------------------------------|--------------------------------|--------------------------------|--------------------------------|-----------------------|----------------|
| 0,5       | 0                              | 0                              | 0                              | 0                              | 0                              | 0                     | 0              |
| 1,5       | 0                              | 0                              | 0                              | 0                              | 0                              | 0                     | 0              |
| 2,5       | 0                              | 0                              | 0                              | 0                              | 0                              | 0                     | 0              |
| 3,5       | 0                              | 0                              | 0                              | 0                              | 0                              | 0                     | 0              |
| 4,5       | 0                              | 0                              | 0                              | 0                              | 0                              | 0                     | 0              |
| 5,5       | 0                              | 0                              | 0                              | 0                              | 0                              | 0                     | 0              |
| 6,5       | 0                              | 0                              | 0                              | 0                              | 0                              | 0                     | 0              |
| 7,5       | 0                              | 0                              | 0                              | 0                              | 0                              | 0                     | 0              |
| 8,5       | 0                              | 0                              | 0                              | 0                              | 0                              | 0                     | 0              |
| 9,5       | 0                              | 0                              | 0                              | 0                              | 0                              | 0                     | 0              |
| 10,5      | 0                              | 0                              | 0                              | 0                              | 0                              | 0                     | 0              |
| 11,5      | 0                              | 0                              | 0                              | 0                              | 0                              | 0                     | 0              |
| 12,5      | 0                              | 0                              | 0                              | 0                              | 0                              | 0                     | 0              |
| 13,5      | 0                              | 0                              | 0                              | 0                              | 0                              | 0                     | 0              |
| 14,5      | 0                              | 0                              | 0                              | 0                              | 0                              | 0                     | 0              |
| 15,5      | 0                              | 0                              | 0                              | 0                              | 0                              | 0                     | 0              |
| 16,5      | 0                              | 0                              | 0                              | 0                              | 0                              | 0                     | 0              |
| 17,5      | 0                              | 0                              | 0                              | 0                              | 0                              | 0                     | 0              |
| 18,5      | 0                              | 0                              | 0                              | 0                              | 0                              | 0                     | 0              |
| 19,5      | 0                              | 0                              | 0                              | 0                              | 0                              | 0                     | 0              |
| 20,5      | 0                              | 0                              | 0                              | 0                              | 0                              | 0                     | 0              |
| 21,5      | 0                              | 0                              | 0                              | 0                              | 0                              | 0                     | 0              |
| 22,5      | 0                              | 0                              | 0                              | 0                              | 0                              | 0                     | 0              |
| 23,5      | 0                              | 0                              | 0                              | 0                              | 0                              | 0                     | 0              |
| 24,5      | 0                              | 0                              | 0                              | 0                              | 0                              | 0                     | 0              |
| 25,5      | 0                              | 0                              | 0                              | 0                              | 0                              | 0                     | 0              |

|      |      |        |           |        |        |          |          |
|------|------|--------|-----------|--------|--------|----------|----------|
| 26,5 | 0    | 0      | 0         | 0      | 0      | 0        | 0        |
| 27,5 | 0    | 0      | 0         | 0      | 0      | 0        | 0        |
| 28,5 | 0    | 0      | 0         | 0      | 0      | 0        | 0        |
| 29,5 | 0    | 0      | 0         | 0      | 0      | 0        | 0        |
| 30,5 | 0    | 0      | 0         | 0      | 0      | 0        | 0        |
| 31,5 | 0    | 0      | 0         | 0      | 0      | 0        | 0        |
| 32,5 | 0    | 0      | 0         | 0      | 0      | 0        | 0        |
| 33,5 | 0    | 0      | 0         | 0      | 0      | 0        | 0        |
| 34,5 | 0    | 0      | 0         | 0      | 0      | 0        | 0        |
| 35,5 | 0    | 0      | 7         | 0      | 0      | 1        | 1        |
| 36,5 | 0    | 0      | 44        | 0      | 0      | 9        | 9        |
| 37,5 | 0    | 0      | 241       | 0      | 0      | 48       | 48       |
| 38,5 | 0    | 0      | 1132      | 0      | 0      | 226      | 226      |
| 39,5 | 0    | 0      | 4552      | 0      | 1      | 911      | 910      |
| 40,5 | 0    | 0      | 15798     | 0      | 3      | 3160     | 3159     |
| 41,5 | 0    | 0      | 47726     | 0      | 9      | 9547     | 9545     |
| 42,5 | 0    | 0      | 126854    | 0      | 20     | 25375    | 25370    |
| 43,5 | 0    | 0      | 300243    | 0      | 43     | 60057    | 60047    |
| 44,5 | 0    | 0      | 641036    | 0      | 86     | 128224   | 128203   |
| 45,5 | 0    | 0      | 1251364   | 0      | 164    | 250306   | 250265   |
| 46,5 | 0    | 0      | 2264111   | 0      | 303    | 452883   | 452807   |
| 47,5 | 0    | 0      | 3848266   | 0      | 547    | 769763   | 769626   |
| 48,5 | 0    | 0      | 6224577   | 0      | 983    | 1245112  | 1244866  |
| 49,5 | 3    | 0      | 9698684   | 0      | 1769   | 1940091  | 1939648  |
| 50,5 | 10   | 0      | 14719417  | 0      | 3214   | 2944528  | 2943722  |
| 51,5 | 28   | 5      | 21972657  | 3      | 5925   | 4395724  | 4394234  |
| 52,5 | 78   | 38     | 32527121  | 29     | 11119  | 6507677  | 6504861  |
| 53,5 | 203  | 256    | 48057598  | 239    | 21268  | 9615913  | 9610422  |
| 54,5 | 507  | 1493   | 71181544  | 1662   | 41447  | 14245331 | 14234056 |
| 55,5 | 1223 | 7536   | 105951653 | 9963   | 82123  | 21210499 | 21185293 |
| 56,5 | 2876 | 33008  | 158539342 | 51702  | 164882 | 31758362 | 31695257 |
| 57,5 | 6628 | 126088 | 238102105 | 233535 | 333939 | 47760459 | 47585443 |

|      |             |             |             |             |            |             |            |
|------|-------------|-------------|-------------|-------------|------------|-------------|------------|
| 58,5 | 15067       | 422710      | 357723289   | 923929      | 678672     | 71952733    | 71442797   |
| 59,5 | 33931       | 1253477     | 535123122   | 3223202     | 1376118    | 108201970   | 106731504  |
| 60,5 | 75947       | 3317636     | 792583271   | 9985021     | 2767533    | 161745881   | 157717780  |
| 61,5 | 169286      | 7916159     | 1155318832  | 27663416    | 5488785    | 239311295   | 229049144  |
| 62,5 | 375997      | 17209217    | 1647610606  | 69024020    | 10678180   | 348979604   | 324873939  |
| 63,5 | 831496      | 34455653    | 2286650281  | 156163259   | 20282833   | 499676704   | 447569643  |
| 64,5 | 1827040     | 64218968    | 3075295984  | 322450387   | 37470602   | 700252596   | 596455472  |
| 65,5 | 3976106     | 112575458   | 3996298720  | 611427815   | 67125106   | 958280641   | 767135364  |
| 66,5 | 8534967     | 187404020   | 5011060331  | 1071053372  | 116357528  | 1278882043  | 952074492  |
| 67,5 | 17985067    | 298846555   | 6064790375  | 1743323679  | 194918642  | 1663972864  | 1142463507 |
| 68,5 | 37014605    | 459996598   | 7097256557  | 2651825152  | 315349988  | 2112288580  | 1330541706 |
| 69,5 | 74021492    | 687811857   | 8055631008  | 3791773247  | 492686813  | 2620384883  | 1510959219 |
| 70,5 | 143138824   | 1004162483  | 8904945367  | 5127123684  | 743527567  | 3184579585  | 1680169305 |
| 71,5 | 266498843   | 1436818625  | 9632974174  | 6596877351  | 1084327453 | 3803499289  | 1834273472 |
| 72,5 | 476011107   | 2020038938  | 10248994340 | 8128876906  | 1528876402 | 4480559539  | 1967079851 |
| 73,5 | 813489141   | 2794249257  | 10778174045 | 9656327203  | 2085109520 | 5225469833  | 2070063901 |
| 74,5 | 1327829465  | 3804135679  | 11254269484 | 11131605065 | 2751677847 | 6053903508  | 2134581749 |
| 75,5 | 2068456052  | 5094413040  | 11712879647 | 12533723044 | 3515032111 | 6984900779  | 2155557630 |
| 76,5 | 3075463497  | 6702717606  | 12186436457 | 13868727657 | 4348012744 | 8036271592  | 2135797845 |
| 77,5 | 4368429058  | 8649672103  | 12701108598 | 15164699482 | 5210905884 | 9218963025  | 2090375729 |
| 78,5 | 5936961965  | 10927245581 | 13275227875 | 16463979841 | 6055464499 | 10531775952 | 2049678602 |
| 79,5 | 7736043296  | 13487899154 | 13918710390 | 17814876702 | 6831529777 | 11957811864 | 2056618542 |
| 80,5 | 9687958459  | 16238150342 | 14633074414 | 19264077235 | 7494905079 | 13463633106 | 2151651973 |
| 81,5 | 11690675067 | 19040342159 | 15411872469 | 20850007401 | 8014494088 | 15001478237 | 2350164927 |
| 82,5 | 13630727056 | 21724943506 | 16241532249 | 22596832525 | 8376798140 | 16514166695 | 2633973607 |
| 83,5 | 15397693928 | 24112669027 | 17102678484 | 24508786509 | 8586709341 | 17941707458 | 2965630272 |
| 84,5 | 16897385087 | 26042079160 | 17971974803 | 26564958131 | 8664760238 | 19228231484 | 3307975428 |
| 85,5 | 18061591603 | 27395748055 | 18824408748 | 28715349827 | 8642031546 | 20327825956 | 3634968720 |
| 86,5 | 18853320010 | 28117979051 | 19635797758 | 30879670710 | 8554361395 | 21208225785 | 3933318778 |
| 87,5 | 19267417434 | 28219661239 | 20385182191 | 32950575635 | 8437286266 | 21852024553 | 4198283321 |
| 88,5 | 19327249244 | 27770048460 | 21056742935 | 34802582771 | 8322528836 | 22255830449 | 4427069497 |
| 89,5 | 19078554800 | 26879113913 | 21640953027 | 36306573046 | 8236181482 | 22428275254 | 4613421417 |

|       |             |             |             |             |             |             |            |
|-------|-------------|-------------|-------------|-------------|-------------|-------------|------------|
| 90,5  | 18581805123 | 25676155801 | 22134822932 | 37347886066 | 8198264313  | 22387786847 | 4746103541 |
| 91,5  | 17904354749 | 24290076022 | 22541277872 | 37844302326 | 8223138396  | 22160629873 | 4811582702 |
| 92,5  | 17113460412 | 22834882903 | 22867858006 | 37759515971 | 8320273483  | 21779198155 | 4798864293 |
| 93,5  | 16270889202 | 21401616320 | 23125020266 | 37108584492 | 8495003706  | 21280222797 | 4703776665 |
| 94,5  | 15429436133 | 20056006866 | 23324334467 | 35954081871 | 8749068288  | 20702585525 | 4530962652 |
| 95,5  | 14631299758 | 18840182080 | 23476820803 | 34394371070 | 9080878796  | 20084710501 | 4293283416 |
| 96,5  | 13907991604 | 17776560503 | 23591599272 | 32547433943 | 9485562599  | 19461829584 | 4009358990 |
| 97,5  | 13281312054 | 16872419490 | 23674941452 | 30534337833 | 9954902533  | 18863582673 | 3700315914 |
| 98,5  | 12764904483 | 16124158132 | 23729750065 | 28465680475 | 10477326902 | 18312364012 | 3386652223 |
| 99,5  | 12365966372 | 15520778703 | 23755448623 | 26432816018 | 11038101671 | 17822622277 | 3085750817 |
| 100,5 | 12086807271 | 15046478173 | 23748239540 | 24504064985 | 11619837537 | 17401085501 | 2810224535 |
| 101,5 | 11926061910 | 14682462045 | 23701676938 | 22724978394 | 12203353430 | 17047706543 | 2567100700 |
| 102,5 | 11879470130 | 14408194426 | 23607491871 | 21121233165 | 12768848709 | 16757047660 | 2357841237 |
| 103,5 | 11940216493 | 14202317954 | 23456597543 | 19702771055 | 13297251371 | 16519830883 | 2179203899 |
| 104,5 | 12098884666 | 14043444978 | 23240188970 | 18468124175 | 13771553502 | 16324439258 | 2024826552 |
| 105,5 | 12343132678 | 13910958047 | 22950838235 | 17408280559 | 14177935551 | 16158229014 | 1887179350 |
| 106,5 | 12657240835 | 13785878069 | 22583478429 | 16509797237 | 14506520517 | 16008583017 | 1759382972 |
| 107,5 | 13021724098 | 13651776559 | 22136172486 | 15757112142 | 14751674891 | 15863692035 | 1636479518 |
| 108,5 | 13413226361 | 13495640092 | 21610581344 | 15134141728 | 14911861395 | 15713090184 | 1515981685 |
| 109,5 | 13804909458 | 13308556005 | 21012079358 | 14625305280 | 14989124790 | 15547994978 | 1397736462 |
| 110,5 | 14167497205 | 13086089475 | 20349509267 | 14216120852 | 14988339007 | 15361511161 | 1283248119 |
| 111,5 | 14471024778 | 12828263781 | 19634616287 | 13893496998 | 14916356290 | 15148751627 | 1174662314 |
| 112,5 | 14687184459 | 12539126011 | 18881241730 | 13645815899 | 14781182081 | 14906910036 | 1073688942 |
| 113,5 | 14791982863 | 12225958269 | 18104382766 | 13462876544 | 14591264397 | 14635292968 | 980829451  |
| 114,5 | 14768284009 | 11898256600 | 17319232240 | 13335745335 | 14354945845 | 14335292806 | 895265402  |
| 115,5 | 14607761788 | 11566629716 | 16540300990 | 13256546790 | 14080089927 | 14010265842 | 815549035  |
| 116,5 | 14311857892 | 11241762683 | 15780699314 | 13218218045 | 13773866344 | 13665280855 | 740883034  |
| 117,5 | 13891529995 | 10933554322 | 15051621030 | 13214246256 | 13442664193 | 13306723159 | 672518769  |
| 118,5 | 13365829200 | 10650485921 | 14362040251 | 13238406230 | 13092096018 | 12941771524 | 614718126  |
| 119,5 | 12759588793 | 10399228499 | 13718603375 | 13284515457 | 12727057083 | 12577798641 | 574559732  |
| 120,5 | 12100666330 | 10184457841 | 13125680261 | 13346224107 | 12351810116 | 12221767731 | 559627919  |
| 121,5 | 11417218723 | 10008825942 | 12585529901 | 13416857737 | 11970073712 | 11879701203 | 573727977  |

|       |             |            |             |             |             |             |            |
|-------|-------------|------------|-------------|-------------|-------------|-------------|------------|
| 122,5 | 10735410871 | 9873033664 | 12098535757 | 13489329661 | 11585100650 | 11556282121 | 613950213  |
| 123,5 | 10077803832 | 9775958225 | 11663472080 | 13556137541 | 11199739519 | 11254622239 | 672253368  |
| 124,5 | 9462494704  | 9714804985 | 11277772025 | 13609454111 | 10816478500 | 10976200865 | 739354616  |
| 125,5 | 8902935082  | 9685270790 | 10937779056 | 13641314767 | 10437473800 | 10720954699 | 807270513  |
| 126,5 | 8408264778  | 9681721956 | 10638973020 | 13643895051 | 10064567217 | 10487484404 | 869975382  |
| 127,5 | 7983965576  | 9697400875 | 10376170377 | 13609859695 | 9699297788  | 10273338862 | 923184796  |
| 128,5 | 7632653193  | 9724679684 | 10143703804 | 13532753284 | 9342912053  | 10075340403 | 963963496  |
| 129,5 | 7354864759  | 9755376518 | 9935589496  | 13407392942 | 8996376326  | 9889920008  | 990397115  |
| 130,5 | 7149746018  | 9781140148 | 9745691242  | 13230218033 | 8660393045  | 9713437697  | 1001368711 |
| 131,5 | 7015584717  | 9793893706 | 9567888784  | 12999552651 | 8335421953  | 9542468362  | 996428489  |
| 132,5 | 6950168466  | 9786310982 | 9396254689  | 12715744444 | 8021705783  | 9374036873  | 975741013  |
| 133,5 | 6950965890  | 9752283333 | 9225239386  | 12381157592 | 7719299334  | 9205789107  | 940103155  |
| 134,5 | 7015141557  | 9687325956 | 9049858994  | 12000016213 | 7428100391  | 9036088622  | 891039271  |
| 135,5 | 7139421558  | 9588872421 | 8865875798  | 11578113889 | 7147880826  | 8864032898  | 830996196  |
| 136,5 | 7319831592  | 9456417121 | 8669957820  | 11122421781 | 6878316311  | 8689388925  | 763676306  |
| 137,5 | 7551335988  | 9291485060 | 8459802439  | 10640638862 | 6619013377  | 8512455145  | 694539330  |
| 138,5 | 7827416195  | 9097433019 | 8234210145  | 10140731590 | 6369532914  | 8333864773  | 631380433  |
| 139,5 | 8139641305  | 8879110166 | 7993098132  | 9630506788  | 6129409656  | 8154353209  | 584419287  |
| 140,5 | 8477299321  | 8642424253 | 7737449216  | 9117252172  | 5898167552  | 7974518503  | 564453807  |
| 141,5 | 8827172428  | 8393868308 | 7469198522  | 8607466264  | 5675331300  | 7794607364  | 578068587  |
| 142,5 | 9173546568  | 8140061201 | 7191067317  | 8106686048  | 5460434554  | 7614359138  | 623232740  |
| 143,5 | 9498538505  | 7887345458 | 6906359083  | 7619408851  | 5253025503  | 7432935480  | 690552924  |
| 144,5 | 9782796406  | 7641470449 | 6618736488  | 7149096101  | 5052670569  | 7248954003  | 768284880  |
| 145,5 | 10006580719 | 7407372577 | 6331998739  | 6698241260  | 4858956988  | 7060630057  | 845826496  |
| 146,5 | 10151164602 | 7189049542 | 6049877078  | 6268482304  | 4671494917  | 6866013688  | 914756909  |
| 147,5 | 10200418665 | 6989515251 | 5775862320  | 5860739785  | 4489919581  | 6663291120  | 968835792  |
| 148,5 | 10142380633 | 6810816216 | 5513073222  | 5475363994  | 4313893810  | 6451105575  | 1003856408 |
| 149,5 | 9970576162  | 6654088858 | 5264169110  | 5112278148  | 4143111080  | 6228844672  | 1017570428 |
| 150,5 | 9684867490  | 6519639069 | 5031305263  | 4771108191  | 3977299042  | 5996843811  | 1009655563 |
| 151,5 | 9291666664  | 6407029338 | 4816125823  | 4451293259  | 3816223303  | 5756467677  | 981660167  |
| 152,5 | 8803450486  | 6315163568 | 4619786588  | 4152173858  | 3659691144  | 5510053129  | 936880971  |
| 153,5 | 8237633232  | 6242364569 | 4442999018  | 3873057298  | 3507554753  | 5260721774  | 880156299  |

|       |            |            |            |            |            |            |           |
|-------|------------|------------|------------|------------|------------|------------|-----------|
| 154,5 | 7614962287 | 6186443465 | 4286086932 | 3613261758 | 3359713532 | 5012093595 | 817563426 |
| 155,5 | 6957675023 | 6144763572 | 4149048330 | 3372141796 | 3216115089 | 4767948762 | 755976941 |
| 156,5 | 6287677084 | 6114303533 | 4031616230 | 3149098899 | 3076754573 | 4531890064 | 702375436 |
| 157,5 | 5624971852 | 6091725575 | 3933314048 | 2943581168 | 2941672167 | 4307052962 | 662758152 |
| 158,5 | 4986501183 | 6073454611 | 3853502602 | 2755076186 | 2810948684 | 4095896653 | 640763513 |
| 159,5 | 4385469434 | 6055772662 | 3791417257 | 2583100836 | 2684699384 | 3900091915 | 636631978 |
| 160,5 | 3831138291 | 6034930766 | 3746194805 | 2427191196 | 2563066292 | 3720504270 | 647371272 |
| 161,5 | 3329015502 | 6007277500 | 3716890605 | 2286894878 | 2446209415 | 3557257580 | 668147595 |
| 162,5 | 2881324391 | 5969399746 | 3702487078 | 2161767314 | 2334297378 | 3409855181 | 693930635 |
| 163,5 | 2487632637 | 5918267921 | 3701895159 | 2051372667 | 2227498014 | 3277333280 | 720539700 |
| 164,5 | 2145531815 | 5851375217 | 3713950544 | 1955289331 | 2125969473 | 3158423276 | 744984629 |
| 165,5 | 1851284889 | 5766858832 | 3737406795 | 1873119433 | 2029852320 | 3051704454 | 765392140 |
| 166,5 | 1600388451 | 5663591355 | 3770927426 | 1804501414 | 1939263039 | 2955734337 | 780786239 |
| 167,5 | 1388023827 | 5541232336 | 3813079106 | 1749124573 | 1854289199 | 2869149808 | 790859036 |
| 168,5 | 1209392446 | 5400233634 | 3862327998 | 1706744458 | 1774986415 | 2790736990 | 795776967 |
| 169,5 | 1059945140 | 5241796797 | 3917041082 | 1677198023 | 1701377119 | 2719471632 | 796026875 |
| 170,5 | 935522685  | 5067785768 | 3975493928 | 1660417621 | 1633450986 | 2654534198 | 792294043 |
| 171,5 | 832427534  | 4880602930 | 4035885984 | 1656442946 | 1571166839 | 2595305247 | 785363549 |
| 172,5 | 747445938  | 4683039969 | 4096363826 | 1665430137 | 1514455716 | 2541347117 | 776039406 |
| 173,5 | 677836987  | 4478116983 | 4155052169 | 1687657209 | 1463224808 | 2492377631 | 765079592 |
| 174,5 | 621301774  | 4268923339 | 4210091726 | 1723524889 | 1417361946 | 2448240735 | 753147866 |
| 175,5 | 575942470  | 4058472208 | 4259682296 | 1773551794 | 1376740345 | 2408877823 | 740784644 |
| 176,5 | 540218184  | 3849577968 | 4302128858 | 1838362690 | 1341223331 | 2374302206 | 728398981 |
| 177,5 | 512902080  | 3644762165 | 4335888012 | 1918668406 | 1310668871 | 2344577907 | 716282004 |
| 178,5 | 493042458  | 3446190256 | 4359611870 | 2015235875 | 1284933718 | 2319802835 | 704639557 |
| 179,5 | 479929207  | 3255638144 | 4372186530 | 2128846804 | 1263877087 | 2300095554 | 693639064 |
| 180,5 | 473066241  | 3074485199 | 4372762588 | 2260243750 | 1247363783 | 2285584312 | 683463369 |
| 181,5 | 472149930  | 2903728851 | 4360775647 | 2410062955 | 1235266777 | 2276396832 | 674362878 |
| 182,5 | 477053255  | 2744015176 | 4335955539 | 2578754200 | 1227469215 | 2272649477 | 666696528 |
| 183,5 | 487815194  | 2595679957 | 4298323789 | 2766489307 | 1223865905 | 2274434831 | 660951865 |
| 184,5 | 504634743  | 2458795194 | 4248179703 | 2973062577 | 1224364312 | 2281807306 | 657735014 |
| 185,5 | 527868831  | 2333216971 | 4186076238 | 3197788421 | 1228885094 | 2294767111 | 657723730 |

|       |            |            |            |            |            |            |           |
|-------|------------|------------|------------|------------|------------|------------|-----------|
| 186,5 | 558033308  | 2218631532 | 4112787467 | 3439403434 | 1237362244 | 2313243597 | 661582550 |
| 187,5 | 595805950  | 2114597438 | 4029269853 | 3695981905 | 1249742849 | 2337079599 | 669849116 |
| 188,5 | 642030212  | 2020582536 | 3936619796 | 3964874920 | 1265986492 | 2366018791 | 682812651 |
| 189,5 | 697718080  | 1935995177 | 3836029914 | 4242683379 | 1286064319 | 2399698174 | 700413464 |
| 190,5 | 764049933  | 1860209678 | 3728746299 | 4525274179 | 1309957746 | 2437647567 | 722190027 |
| 191,5 | 842368799  | 1792586360 | 3616028702 | 4807846255 | 1337656790 | 2479297381 | 747286705 |
| 192,5 | 934165762  | 1732486755 | 3499115118 | 5085049295 | 1369157982 | 2523994983 | 774517566 |
| 193,5 | 1041052714 | 1679284661 | 3379191803 | 5351152994 | 1404461808 | 2571028796 | 802469032 |
| 194,5 | 1164718103 | 1632373762 | 3257369264 | 5600259253 | 1443569602 | 2619657997 | 829621109 |
| 195,5 | 1306861103 | 1591172506 | 3134664369 | 5826544587 | 1486479815 | 2669144476 | 854471167 |
| 196,5 | 1469099770 | 1555126864 | 3011988321 | 6024515859 | 1533183578 | 2718782879 | 875650868 |
| 197,5 | 1652849604 | 1523711514 | 2890140036 | 6189260097 | 1583659476 | 2767924146 | 892031825 |
| 198,5 | 1859170627 | 1496429908 | 2769804212 | 6316668916 | 1637867449 | 2815988222 | 902817836 |
| 199,5 | 2088583972 | 1472813592 | 2651553333 | 6403620187 | 1695741783 | 2862462573 | 907621335 |
| 200,5 | 2340863031 | 1452421076 | 2535852781 | 6448103646 | 1757183145 | 2906884736 | 906519579 |
| 201,5 | 2614809488 | 1434836467 | 2423068271 | 6449282647 | 1822049711 | 2948809317 | 900082609 |
| 202,5 | 2908030739 | 1419668040 | 2313474879 | 6407490377 | 1890147432 | 2987762293 | 889360410 |
| 203,5 | 3216741574 | 1406546844 | 2207267018 | 6324164751 | 1961219632 | 3023187964 | 875812280 |
| 204,5 | 3535618665 | 1395125435 | 2104568845 | 6201731159 | 2034936162 | 3054396053 | 861160341 |
| 205,5 | 3857739961 | 1385076761 | 2005444631 | 6043445700 | 2110882480 | 3080517906 | 847157344 |
| 206,5 | 4174641141 | 1376093229 | 1909908793 | 5853213320 | 2188549144 | 3100481125 | 835282896 |
| 207,5 | 4476516436 | 1367885959 | 1817935322 | 5635395348 | 2267322314 | 3113011076 | 826421250 |
| 208,5 | 4752580498 | 1360184204 | 1729466458 | 5394619595 | 2346476023 | 3116665355 | 820610514 |
| 209,5 | 4991591605 | 1352734939 | 1644420486 | 5135603868 | 2425167039 | 3109903587 | 816956484 |
| 210,5 | 5182515503 | 1345302591 | 1562698644 | 4863000791 | 2502433288 | 3091190163 | 813756689 |
| 211,5 | 5315286031 | 1337668895 | 1484191085 | 4581268848 | 2577196784 | 3059122329 | 808803661 |
| 212,5 | 5381597073 | 1329632865 | 1408781958 | 4294571698 | 2648272026 | 3012571124 | 799779474 |
| 213,5 | 5375644489 | 1321010844 | 1336353618 | 4006705491 | 2714380694 | 2950819027 | 784644859 |
| 214,5 | 5294730561 | 1311636649 | 1266790030 | 3721052073 | 2774173261 | 2873676515 | 761954777 |
| 215,5 | 5139649983 | 1301361766 | 1199979435 | 3440554873 | 2826257820 | 2781560775 | 731069231 |
| 216,5 | 4914796245 | 1290055590 | 1135816332 | 3167713588 | 2869235988 | 2675523549 | 692254922 |
| 217,5 | 4627958632 | 1277605699 | 1074202854 | 2904593666 | 2901745227 | 2557221216 | 646686833 |

|       |            |            |            |            |            |            |           |
|-------|------------|------------|------------|------------|------------|------------|-----------|
| 218,5 | 4289818488 | 1263918130 | 1015049601 | 2652846797 | 2922506323 | 2428827868 | 596362837 |
| 219,5 | 3913192739 | 1248917635 | 958276002  | 2413739023 | 2930374174 | 2292899915 | 543941373 |
| 220,5 | 3512106012 | 1232547901 | 903810269  | 2188183649 | 2924389434 | 2152207453 | 492501401 |
| 221,5 | 3100794125 | 1214771692 | 851589005  | 1976776717 | 2903828123 | 2009551932 | 445205987 |
| 222,5 | 2692747522 | 1195570881 | 801556533  | 1779833350 | 2868246030 | 1867590863 | 404841679 |
| 223,5 | 2299892695 | 1174946353 | 753664009  | 1597423758 | 2817514655 | 1728688294 | 373252608 |
| 224,5 | 1931985358 | 1152917734 | 707868360  | 1429408099 | 2751845727 | 1594805056 | 350835498 |
| 225,5 | 1596256028 | 1129522926 | 664131132  | 1275469665 | 2671801815 | 1467436313 | 336409471 |
| 226,5 | 1297313047 | 1104817417 | 622417270  | 1135146092 | 2578291398 | 1347597045 | 327650739 |
| 227,5 | 1037276093 | 1078873360 | 582693902  | 1007858405 | 2472547763 | 1235849905 | 321876349 |
| 228,5 | 816089530  | 1051778405 | 544929160  | 892937797  | 2356092300 | 1132365438 | 316736415 |
| 229,5 | 631952186  | 1023634292 | 509091081  | 789650081  | 2230683883 | 1037002305 | 310563471 |
| 230,5 | 481798370  | 994555217  | 475146614  | 697217765  | 2098257168 | 949395027  | 302413229 |
| 231,5 | 361772416  | 964665989  | 443060783  | 614839703  | 1960853426 | 869038463  | 291941550 |
| 232,5 | 267652679  | 934100020  | 412795988  | 541708323  | 1820548097 | 795361021  | 279233669 |
| 233,5 | 195197180  | 902997190  | 384311497  | 477024399  | 1679379399 | 727781933  | 264644660 |
| 234,5 | 140398989  | 871501627  | 357563103  | 420009418  | 1539282112 | 665751050  | 248671808 |
| 235,5 | 99652615   | 839759469  | 332502961  | 369915585  | 1402030065 | 608772139  | 231861282 |
| 236,5 | 69842011   | 807916648  | 309079595  | 326033593  | 1269190044 | 556412378  | 214744617 |
| 237,5 | 48366046   | 776116770  | 287238055  | 287698284  | 1142088807 | 508301593  | 197798738 |
| 238,5 | 33118937   | 744499123  | 266920209  | 254292410  | 1021793818 | 464124899  | 181423514 |
| 239,5 | 22442131   | 713196867  | 248065154  | 225248682  | 909107332  | 423612033  | 165931775 |
| 240,5 | 15061476   | 682335451  | 230609713  | 200050382  | 804572556  | 386525916  | 151547862 |
| 241,5 | 10020158   | 652031269  | 214489000  | 178230745  | 708489989  | 352652232  | 138411883 |
| 242,5 | 6614499    | 622390590  | 199637023  | 159371387  | 620941629  | 321791026  | 126587749 |
| 243,5 | 4336810    | 593508757  | 185987313  | 143099998  | 541820565  | 293750689  | 116073798 |
| 244,5 | 2827183    | 565469667  | 173473540  | 129087516  | 470863533  | 268344288  | 106815209 |
| 245,5 | 1834553    | 538345513  | 162030115  | 117044980  | 407684258  | 245387884  | 98717508  |
| 246,5 | 1186326    | 512196777  | 151592754  | 106720222  | 351805749  | 224700366  | 91660386  |
| 247,5 | 765424     | 487072443  | 142098992  | 97894521   | 302690134  | 206104303  | 85510821  |
| 248,5 | 493370     | 463010413  | 133488648  | 90379352   | 259765063  | 189427369  | 80134505  |
| 249,5 | 318114     | 440038082  | 125704220  | 84013278   | 222446129  | 174503965  | 75404744  |



|       |        |           |           |           |           |           |          |
|-------|--------|-----------|-----------|-----------|-----------|-----------|----------|
| 250,5 | 205455 | 418173060 | 118691229 | 78659069  | 190155092 | 161176781 | 71208424 |
| 251,5 | 133100 | 397423980 | 112398490 | 74201074  | 162333990 | 149298127 | 67449139 |
| 252,5 | 86613  | 377791391 | 106778338 | 70542862  | 138455449 | 138730931 | 64047954 |
| 253,5 | 56697  | 359268688 | 101786790 | 67605160  | 118029613 | 129349390 | 60942460 |
| 254,5 | 37389  | 341843064 | 97383668  | 65324073  | 100608201 | 121039279 | 58084839 |
| 255,5 | 24876  | 325496452 | 93532679  | 63649579  | 85786243  | 113697966 | 55439478 |
| 256,5 | 16723  | 310206451 | 90201463  | 62544303  | 73201984  | 107234185 | 52980569 |
| 257,5 | 11376  | 295947209 | 87361624  | 61982538  | 62535440  | 101567637 | 50689937 |
| 258,5 | 7843   | 282690261 | 84988734  | 61949516  | 53506019  | 96628474  | 48555224 |
| 259,5 | 5487   | 270405312 | 83062334  | 62440894  | 45869530  | 92356712  | 46568472 |
| 260,5 | 3902   | 259060949 | 81565935  | 63462461  | 39414880  | 88701625  | 44725106 |
| 261,5 | 2824   | 248625300 | 80487016  | 65030023  | 33960647  | 85621162  | 43023257 |
| 262,5 | 2083   | 239066625 | 79817034  | 67169468  | 29351705  | 83081383  | 41463411 |
| 263,5 | 1568   | 230353839 | 79551447  | 69916981  | 25455999  | 81055967  | 40048325 |
| 264,5 | 1206   | 222456981 | 79689748  | 73319382  | 22161538  | 79525771  | 38783172 |
| 265,5 | 949    | 215347629 | 80235525  | 77434553  | 19373659  | 78478463  | 37675883 |
| 266,5 | 764    | 208999252 | 81196524  | 82331923  | 17012564  | 77908206  | 36737646 |
| 267,5 | 631    | 203387527 | 82584746  | 88092955  | 15011146  | 77815401  | 35983501 |
| 268,5 | 534    | 198490608 | 84416540  | 94811564  | 13313076  | 78206465  | 35432957 |
| 269,5 | 464    | 194289360 | 86712726  | 102594403 | 11871151  | 79093621  | 35110528 |
| 270,5 | 414    | 190767552 | 89498697  | 111560913 | 10645868  | 80494689  | 35046022 |
| 271,5 | 380    | 187912031 | 92804537  | 121843010 | 9604211   | 82432834  | 35274433 |
| 272,5 | 359    | 185712858 | 96665107  | 133584302 | 8718614   | 84936248  | 35835288 |
| 273,5 | 348    | 184163420 | 101120101 | 146938662 | 7966090   | 88037724  | 36771364 |
| 274,5 | 347    | 183260518 | 106214054 | 162068005 | 7327498   | 91774084  | 38126867 |
| 275,5 | 355    | 183004418 | 111996271 | 179139102 | 6786930   | 96185416  | 39945270 |
| 276,5 | 374    | 183398879 | 118520661 | 198319263 | 6331200   | 101314075 | 42267127 |
| 277,5 | 405    | 184451132 | 125845435 | 219770757 | 5949418   | 107203430 | 45128150 |
| 278,5 | 451    | 186171815 | 134032649 | 243643874 | 5632648   | 113896287 | 48557666 |
| 279,5 | 514    | 188574852 | 143147540 | 270068575 | 5373617   | 121433020 | 52577425 |
| 280,5 | 602    | 191677256 | 153257627 | 299144807 | 5166485   | 129849355 | 57200570 |
| 281,5 | 722    | 195498838 | 164431529 | 330931640 | 5006665   | 139173879 | 62430561 |

|       |          |           |           |           |          |           |           |
|-------|----------|-----------|-----------|-----------|----------|-----------|-----------|
| 282,5 | 886      | 200061811 | 176737479 | 365435529 | 4890674  | 149425276 | 68259924  |
| 283,5 | 1112     | 205390256 | 190241469 | 402598161 | 4816027  | 160609405 | 74668783  |
| 284,5 | 1426     | 211509419 | 205005041 | 442284496 | 4781159  | 172716308 | 81623257  |
| 285,5 | 1865     | 218444825 | 221082665 | 484271781 | 4785377  | 185717303 | 89073891  |
| 286,5 | 2485     | 226221166 | 238518739 | 528240405 | 4828839  | 199562327 | 96954328  |
| 287,5 | 3369     | 234860931 | 257344214 | 573767570 | 4912557  | 214177728 | 105180455 |
| 288,5 | 4639     | 244382758 | 277572886 | 620324756 | 5038432  | 229464694 | 113650253 |
| 289,5 | 6478     | 254799483 | 299197449 | 667279872 | 5209305  | 245298517 | 122244558 |
| 290,5 | 9164     | 266115865 | 322185392 | 713904835 | 5429050  | 261528861 | 130828885 |
| 291,5 | 13108    | 278325998 | 346474900 | 759389036 | 5702689  | 277981146 | 139256393 |
| 292,5 | 18932    | 291410424 | 371970936 | 802858814 | 6036541  | 294459129 | 147372018 |
| 293,5 | 27567    | 305332993 | 398541697 | 843402601 | 6438416  | 310748655 | 155017659 |
| 294,5 | 40407    | 320037546 | 426015707 | 880100967 | 6917843  | 326622494 | 162038223 |
| 295,5 | 59531    | 335444539 | 454179782 | 912060303 | 7486355  | 341846102 | 168288231 |
| 296,5 | 88025    | 351447760 | 482778139 | 938448483 | 8157823  | 356184046 | 173638561 |
| 297,5 | 130446   | 367911339 | 511512896 | 958530508 | 8948850  | 369406808 | 177982876 |
| 298,5 | 193468   | 384667302 | 540046186 | 971701986 | 9879239  | 381297636 | 181243174 |
| 299,5 | 286786   | 401513937 | 568004056 | 977518264 | 10972528 | 391659114 | 183373959 |
| 300,5 | 424346   | 418215292 | 594982264 | 975717235 | 12256604 | 400319148 | 184364496 |
| 301,5 | 625975   | 434502109 | 620553968 | 966234177 | 13764400 | 407136126 | 184238775 |
| 302,5 | 919524   | 450074501 | 644279244 | 949207503 | 15534668 | 412003088 | 183052879 |
| 303,5 | 1343563  | 464606609 | 665716209 | 924974920 | 17612830 | 414850826 | 180889739 |
| 304,5 | 1950703  | 477753423 | 684433426 | 894060164 | 20051886 | 415649921 | 177851431 |
| 305,5 | 2811528  | 489159795 | 700023173 | 857151128 | 22913355 | 414411796 | 174049569 |
| 306,5 | 4019040  | 498471536 | 712115028 | 815070801 | 26268223 | 411188926 | 169594606 |
| 307,5 | 5693414  | 505348313 | 720389164 | 768742903 | 30197833 | 406074326 | 164585183 |
| 308,5 | 7986689  | 509477847 | 724588724 | 719154352 | 34794650 | 399200452 | 159098857 |
| 309,5 | 11086866 | 510590722 | 724530603 | 667316865 | 40162803 | 390737572 | 153185508 |
| 310,5 | 15220688 | 508474965 | 720114056 | 614229882 | 46418292 | 380891577 | 146864521 |
| 311,5 | 20654251 | 502989422 | 711326587 | 560846769 | 53688692 | 369901144 | 140126329 |
| 312,5 | 27690496 | 494074910 | 698246736 | 508045884 | 62112199 | 358034045 | 132938321 |
| 313,5 | 36662667 | 481762188 | 681043513 | 456607635 | 71835820 | 345582365 | 125254598 |

|       |           |           |           |           |           |           |           |
|-------|-----------|-----------|-----------|-----------|-----------|-----------|-----------|
| 314,5 | 47923015  | 466175906 | 659972420 | 407198152 | 83012484  | 332856395 | 117028777 |
| 315,5 | 61826338  | 447533955 | 635368190 | 360359704 | 95796886  | 320177014 | 108229254 |
| 316,5 | 78708508  | 426141946 | 607634548 | 316507563 | 110339867 | 307866486 | 98857167  |
| 317,5 | 98860738  | 402382924 | 577231473 | 275932644 | 126781191 | 296237794 | 88969033  |
| 318,5 | 122501091 | 376702807 | 544660584 | 238808978 | 145240673 | 285582827 | 78709434  |
| 319,5 | 149745356 | 349592423 | 510449345 | 205204953 | 165807702 | 276159956 | 68365462  |
| 320,5 | 180579985 | 321567278 | 475134864 | 175097155 | 188529389 | 268181734 | 58464911  |
| 321,5 | 214839983 | 293146411 | 439248024 | 148385704 | 213397736 | 261803572 | 49940576  |
| 322,5 | 252194578 | 264831744 | 403298671 | 124910078 | 240336453 | 257114305 | 44279276  |
| 323,5 | 292143027 | 237089254 | 367762454 | 104464563 | 269188265 | 254129513 | 43170711  |
| 324,5 | 334022041 | 210333116 | 333069822 | 86812654  | 299703776 | 252788282 | 47220474  |
| 325,5 | 377025273 | 184913660 | 299597503 | 71699927  | 331533082 | 252953889 | 55329240  |
| 326,5 | 420234041 | 161109636 | 267662657 | 58865076  | 364221477 | 254418577 | 65831064  |
| 327,5 | 462657307 | 139124889 | 237519713 | 48048979  | 397210486 | 256912275 | 77423647  |
| 328,5 | 503277939 | 119089217 | 209359782 | 39001795  | 429845353 | 260114817 | 89244614  |
| 329,5 | 541101634 | 101062858 | 183312392 | 31488198  | 461389735 | 263670963 | 100714503 |
| 330,5 | 575204669 | 85043870  | 159449203 | 25290931  | 491047883 | 267207311 | 111419441 |
| 331,5 | 604776841 | 70977517  | 137789319 | 20212905  | 517993952 | 270350107 | 121049396 |
| 332,5 | 629156539 | 58766788  | 118305736 | 16078102  | 541407362 | 272742906 | 129368603 |
| 333,5 | 647855794 | 48283207  | 100932521 | 12731514  | 560512413 | 274063090 | 136201898 |
| 334,5 | 660574131 | 39377228  | 85572286  | 10038380  | 574619666 | 274036338 | 141428484 |
| 335,5 | 667201166 | 31887664  | 72103617  | 7882905   | 583166155 | 272448301 | 144978907 |
| 336,5 | 667808759 | 25649785  | 60388138  | 6166668   | 585751193 | 269152909 | 146833106 |
| 337,5 | 662634337 | 20501894  | 50276984  | 4806851   | 582164679 | 264076949 | 147018368 |
| 338,5 | 652057479 | 16290311  | 41616506  | 3734411   | 572405172 | 257220776 | 145606534 |
| 339,5 | 636572064 | 12872874  | 34253123  | 2892290   | 556685799 | 248655230 | 142710075 |
| 340,5 | 616756311 | 10121082  | 28037272  | 2233718   | 535427039 | 238515084 | 138476848 |
| 341,5 | 593242788 | 7921121   | 22826466  | 1720643   | 509236603 | 226989524 | 133083518 |
| 342,5 | 566690144 | 6173978   | 18487525  | 1322329   | 478877826 | 214310361 | 126727798 |
| 343,5 | 537757869 | 4794903   | 14898046  | 1014112   | 445228999 | 200738786 | 119619827 |
| 344,5 | 507084945 | 3712398   | 11947225  | 776322    | 409236912 | 186551560 | 111973142 |
| 345,5 | 475272832 | 2866939   | 9536130   | 593362    | 371868296 | 172027512 | 103995788 |

|       |           |         |         |        |           |           |          |
|-------|-----------|---------|---------|--------|-----------|-----------|----------|
| 346,5 | 442872848 | 2209557 | 7577542 | 452930 | 334062903 | 157435156 | 95882153 |
| 347,5 | 410377737 | 1700406 | 5995462 | 345374 | 296691613 | 143022119 | 87806072 |
| 348,5 | 378216992 | 1307379 | 4724388 | 263153 | 260522279 | 129006838 | 79915652 |
| 349,5 | 346755376 | 1004835 | 3708437 | 200400 | 226195109 | 115572832 | 72330119 |
| 350,5 | 316294037 | 772462  | 2900388 | 152571 | 194208388 | 102865569 | 65138783 |
| 351,5 | 287073601 | 594283  | 2260693 | 116156 | 164914338 | 90991814  | 58402019 |
| 352,5 | 259278653 | 457814  | 1756513 | 88453  | 138524072 | 80021101  | 52153983 |
| 353,5 | 233043122 | 353352  | 1360795 | 67390  | 115119993 | 69988930  | 46406594 |
| 354,5 | 208456111 | 273395  | 1051420 | 51381  | 94673552  | 60901172  | 41154253 |
| 355,5 | 185567853 | 212167  | 810429  | 39213  | 77066242  | 52739181  | 36378724 |
| 356,5 | 164395512 | 165237  | 623342  | 29963  | 62111761  | 45465163  | 32053679 |
| 357,5 | 144928657 | 129214  | 478552  | 22928  | 49577604  | 39027391  | 28148547 |
| 358,5 | 127134289 | 101510  | 366816  | 17574  | 39204717  | 33364981  | 24631456 |
| 359,5 | 110961345 | 80156   | 280806  | 13496  | 30724329  | 28412026  | 21471229 |
| 360,5 | 96344674  | 63649   | 214751  | 10386  | 23871458  | 24100984  | 18638543 |
| 361,5 | 83208472  | 50851   | 164120  | 8011   | 18395004  | 20365292  | 16106412 |
| 362,5 | 71469235  | 40893   | 125379  | 6195   | 14064616  | 17141263  | 13850213 |
| 363,5 | 61038245  | 33116   | 95776   | 4803   | 10674707  | 14369329  | 11847445 |
| 364,5 | 51823674  | 27018   | 73181   | 3735   | 8046137   | 11994749  | 10077375 |
| 365,5 | 43732324  | 22215   | 55948   | 2913   | 6026087   | 9967897   | 8520677  |
| 366,5 | 36671091  | 18417   | 42812   | 2279   | 4486656   | 8244251   | 7159130  |
| 367,5 | 30548173  | 15399   | 32800   | 1789   | 3322627   | 6784158   | 5975400  |
| 368,5 | 25274075  | 12991   | 25169   | 1410   | 2448799   | 5552489   | 4952906  |
| 369,5 | 20762440  | 11061   | 19351   | 1115   | 1797161   | 4518225   | 4075766  |
| 370,5 | 16930740  | 9507    | 14910   | 884    | 1314138   | 3654036   | 3328794  |
| 371,5 | 13700826  | 8251    | 11519   | 705    | 958032    | 2935867   | 2697537  |
| 372,5 | 10999376  | 7233    | 8925    | 563    | 696750    | 2342569   | 2168337  |
| 373,5 | 8758225   | 6406    | 6938    | 452    | 505837    | 1855572   | 1728391  |
| 374,5 | 6914600   | 5732    | 5412    | 365    | 366831    | 1458588   | 1365813  |
| 375,5 | 5411251   | 5183    | 4239    | 295    | 265909    | 1137375   | 1069679  |
| 376,5 | 4196487   | 4737    | 3335    | 240    | 192799    | 879520    | 830058   |
| 377,5 | 3224124   | 4375    | 2635    | 196    | 139921    | 674250    | 638025   |

|       |         |       |      |     |        |        |        |
|-------|---------|-------|------|-----|--------|--------|--------|
| 378,5 | 2453340 | 4085  | 2093 | 161 | 101710 | 512278 | 485649 |
| 379,5 | 1848459 | 3856  | 1671 | 132 | 74106  | 385645 | 365971 |
| 380,5 | 1378662 | 3679  | 1342 | 109 | 54157  | 287590 | 272958 |
| 381,5 | 1017645 | 3549  | 1084 | 91  | 39726  | 212419 | 201443 |
| 382,5 | 743231  | 3461  | 881  | 76  | 29270  | 155384 | 147061 |
| 383,5 | 536965  | 3411  | 721  | 63  | 21676  | 112567 | 106174 |
| 384,5 | 383684  | 3398  | 593  | 53  | 16146  | 80775  | 75784  |
| 385,5 | 271097  | 3421  | 492  | 45  | 12106  | 57432  | 53460  |
| 386,5 | 189375  | 3480  | 411  | 38  | 9141   | 40489  | 37257  |
| 387,5 | 130767  | 3577  | 347  | 32  | 6957   | 28336  | 25639  |
| 388,5 | 89247   | 3714  | 294  | 28  | 5339   | 19724  | 17410  |
| 389,5 | 60195   | 3895  | 252  | 24  | 4135   | 13700  | 11656  |
| 390,5 | 40118   | 4125  | 217  | 20  | 3234   | 9543   | 7687   |
| 391,5 | 26419   | 4410  | 189  | 18  | 2555   | 6718   | 4992   |
| 392,5 | 17189   | 4759  | 166  | 15  | 2041   | 4834   | 3205   |
| 393,5 | 11049   | 5183  | 147  | 13  | 1648   | 3608   | 2081   |
| 394,5 | 7017    | 5694  | 131  | 12  | 1347   | 2840   | 1469   |
| 395,5 | 4403    | 6309  | 119  | 10  | 1115   | 2391   | 1262   |
| 396,5 | 2729    | 7049  | 108  | 9   | 934    | 2166   | 1315   |
| 397,5 | 1671    | 7939  | 99   | 8   | 793    | 2102   | 1489   |
| 398,5 | 1012    | 9011  | 92   | 7   | 683    | 2161   | 1723   |
| 399,5 | 605     | 10302 | 86   | 6   | 596    | 2319   | 2000   |
| 400,5 | 358     | 11862 | 82   | 5   | 527    | 2567   | 2326   |
| 401,5 | 209     | 13751 | 78   | 5   | 473    | 2903   | 2713   |
| 402,5 | 121     | 16044 | 75   | 4   | 431    | 3335   | 3178   |
| 403,5 | 69      | 18832 | 73   | 4   | 398    | 3875   | 3740   |
| 404,5 | 39      | 22234 | 72   | 3   | 373    | 4544   | 4423   |
| 405,5 | 22      | 26392 | 72   | 3   | 355    | 5369   | 5256   |
| 406,5 | 12      | 31489 | 72   | 3   | 343    | 6384   | 6277   |
| 407,5 | 7       | 37749 | 73   | 2   | 336    | 7633   | 7529   |
| 408,5 | 4       | 45453 | 74   | 2   | 334    | 9173   | 9070   |
| 409,5 | 2       | 54955 | 77   | 2   | 337    | 11074  | 10970  |

|       |   |          |      |   |       |         |         |
|-------|---|----------|------|---|-------|---------|---------|
| 410,5 | 1 | 66693    | 80   | 2 | 344   | 13424   | 13317   |
| 411,5 | 0 | 81214    | 84   | 2 | 357   | 16332   | 16221   |
| 412,5 | 0 | 99205    | 89   | 2 | 376   | 19934   | 19818   |
| 413,5 | 0 | 121515   | 95   | 1 | 401   | 24403   | 24278   |
| 414,5 | 0 | 149207   | 102  | 1 | 434   | 29949   | 29815   |
| 415,5 | 0 | 183599   | 111  | 1 | 475   | 36837   | 36690   |
| 416,5 | 0 | 226325   | 122  | 1 | 527   | 45395   | 45233   |
| 417,5 | 0 | 279411   | 135  | 0 | 592   | 56028   | 55846   |
| 418,5 | 0 | 345359   | 150  | 0 | 672   | 69236   | 69031   |
| 419,5 | 0 | 427249   | 168  | 0 | 772   | 85638   | 85403   |
| 420,5 | 0 | 528869   | 190  | 0 | 897   | 105991  | 105720  |
| 421,5 | 0 | 654854   | 216  | 0 | 1053  | 131225  | 130907  |
| 422,5 | 0 | 810862   | 247  | 0 | 1248  | 162471  | 162098  |
| 423,5 | 0 | 1003770  | 284  | 0 | 1493  | 201110  | 200665  |
| 424,5 | 0 | 1241907  | 329  | 0 | 1802  | 248808  | 248275  |
| 425,5 | 0 | 1535309  | 384  | 0 | 2193  | 307577  | 306933  |
| 426,5 | 0 | 1896015  | 450  | 0 | 2689  | 379831  | 379046  |
| 427,5 | 0 | 2338392  | 531  | 0 | 3322  | 468449  | 467486  |
| 428,5 | 0 | 2879493  | 628  | 0 | 4130  | 576850  | 575661  |
| 429,5 | 0 | 3539435  | 748  | 0 | 5166  | 709070  | 707592  |
| 430,5 | 0 | 4341809  | 894  | 0 | 6498  | 869840  | 867993  |
| 431,5 | 0 | 5314086  | 1074 | 0 | 8213  | 1064675 | 1062354 |
| 432,5 | 0 | 6488030  | 1295 | 0 | 10427 | 1299950 | 1297021 |
| 433,5 | 0 | 7900090  | 1566 | 0 | 13287 | 1582989 | 1579277 |
| 434,5 | 0 | 9591748  | 1902 | 0 | 16987 | 1922127 | 1917408 |
| 435,5 | 0 | 11609795 | 2316 | 0 | 21778 | 2326778 | 2320758 |
| 436,5 | 0 | 14006516 | 2829 | 0 | 27982 | 2807465 | 2799768 |
| 437,5 | 0 | 16839734 | 3465 | 0 | 36015 | 3375843 | 3365980 |
| 438,5 | 0 | 20172684 | 4253 | 0 | 46411 | 4044670 | 4032013 |
| 439,5 | 0 | 24073677 | 5232 | 0 | 59852 | 4827752 | 4811494 |
| 440,5 | 0 | 28615502 | 6449 | 0 | 77209 | 5739832 | 5718936 |
| 441,5 | 0 | 33874550 | 7961 | 0 | 99582 | 6796419 | 6769559 |

|       |   |           |         |   |          |           |          |
|-------|---|-----------|---------|---|----------|-----------|----------|
| 442,5 | 0 | 39929600  | 9842    | 0 | 128361   | 8013561   | 7979047  |
| 443,5 | 0 | 46860260  | 12182   | 0 | 165289   | 9407546   | 9363231  |
| 444,5 | 0 | 54745043  | 15092   | 0 | 212539   | 10994535  | 10937701 |
| 445,5 | 0 | 63659080  | 18711   | 0 | 272805   | 12790119  | 12717345 |
| 446,5 | 0 | 73671481  | 23209   | 0 | 349404   | 14808819  | 14715815 |
| 447,5 | 0 | 84842399  | 28797   | 0 | 446389   | 17063517  | 16944932 |
| 448,5 | 0 | 97219848  | 35735   | 0 | 568681   | 19564853  | 19414049 |
| 449,5 | 0 | 110836368 | 44339   | 0 | 722200   | 22320582  | 22129372 |
| 450,5 | 0 | 125705651 | 55000   | 0 | 914017   | 25334934  | 25093281 |
| 451,5 | 0 | 141819254 | 68190   | 0 | 1152500  | 28607989  | 28303665 |
| 452,5 | 0 | 159143560 | 84489   | 0 | 1447458  | 32135101  | 31753308 |
| 453,5 | 0 | 177617148 | 104596  | 0 | 1810285  | 35906406  | 35429359 |
| 454,5 | 0 | 197148733 | 129359  | 0 | 2254076  | 39906434  | 39312914 |
| 455,5 | 0 | 217615853 | 159799  | 0 | 2793719  | 44113874  | 43378751 |
| 456,5 | 0 | 238864439 | 197142  | 0 | 3445952  | 48501507  | 47595248 |
| 457,5 | 0 | 260709403 | 242854  | 0 | 4229361  | 53036324  | 51924503 |
| 458,5 | 0 | 282936323 | 298683  | 0 | 5164320  | 57679865  | 56322681 |
| 459,5 | 0 | 305304287 | 366702  | 0 | 6272853  | 62388768  | 60740595 |
| 460,5 | 0 | 327549860 | 449362  | 0 | 7578408  | 67115526  | 65124525 |
| 461,5 | 0 | 349392141 | 549544  | 0 | 9105539  | 71809445  | 69417253 |
| 462,5 | 0 | 370538776 | 670623  | 0 | 10879482 | 76417776  | 73559301 |
| 463,5 | 0 | 390692743 | 816531  | 0 | 12925631 | 80886981  | 77490335 |
| 464,5 | 0 | 409559702 | 991828  | 0 | 15268917 | 85164090  | 81150681 |
| 465,5 | 0 | 426855630 | 1201771 | 0 | 17933093 | 89198099  | 84482917 |
| 466,5 | 0 | 442314459 | 1452392 | 0 | 20939944 | 92941359  | 87433458 |
| 467,5 | 0 | 455695408 | 1750571 | 0 | 24308446 | 96350885  | 89954101 |
| 468,5 | 0 | 466789704 | 2104108 | 1 | 28053890 | 99389541  | 92003443 |
| 469,5 | 0 | 475426430 | 2521796 | 1 | 32187016 | 102027049 | 93548132 |
| 470,5 | 0 | 481477235 | 3013478 | 2 | 36713178 | 104240779 | 94563885 |
| 471,5 | 0 | 484859733 | 3590102 | 2 | 41631584 | 106016284 | 95036250 |
| 472,5 | 0 | 485539444 | 4263758 | 2 | 46934646 | 107347570 | 94961068 |
| 473,5 | 0 | 483530223 | 5047698 | 3 | 52607475 | 108237080 | 94344628 |

|       |   |           |           |       |           |           |          |
|-------|---|-----------|-----------|-------|-----------|-----------|----------|
| 474,5 | 0 | 478893177 | 5956332   | 3     | 58627548  | 108695412 | 93203508 |
| 475,5 | 0 | 471734145 | 7005197   | 4     | 64964583  | 108740786 | 91564125 |
| 476,5 | 0 | 462199880 | 8210898   | 5     | 71580621  | 108398281 | 89462002 |
| 477,5 | 0 | 450473118 | 9591005   | 6     | 78430345  | 107698895 | 86940807 |
| 478,5 | 0 | 436766774 | 11163913  | 8     | 85461622  | 106678464 | 84051194 |
| 479,5 | 0 | 421317513 | 12948660  | 10    | 92616263  | 105376489 | 80849510 |
| 480,5 | 0 | 404378976 | 14964691  | 13    | 99830979  | 103834932 | 77396401 |
| 481,5 | 0 | 386214924 | 17231577  | 17    | 107038508 | 102097005 | 73755388 |
| 482,5 | 0 | 367092556 | 19768681  | 22    | 114168880 | 100206028 | 69991442 |
| 483,5 | 0 | 347276227 | 22594770  | 28    | 121150774 | 98204360  | 66169604 |
| 484,5 | 0 | 327021755 | 25727590  | 37    | 127912920 | 96132460  | 62353670 |
| 485,5 | 0 | 306571463 | 29183387  | 48    | 134385517 | 94028083  | 58604947 |
| 486,5 | 0 | 286150068 | 32976397  | 64    | 140501603 | 91925626  | 54981088 |
| 487,5 | 0 | 265961462 | 37118305  | 85    | 146198345 | 89855639  | 51534961 |
| 488,5 | 0 | 246186406 | 41617689  | 113   | 151418208 | 87844483  | 48313552 |
| 489,5 | 0 | 226981117 | 46479458  | 151   | 156109978 | 85914141  | 45356860 |
| 490,5 | 0 | 208476678 | 51704302  | 202   | 160229602 | 84082157  | 42696803 |
| 491,5 | 0 | 190779204 | 57288168  | 272   | 163740840 | 82361697  | 40356199 |
| 492,5 | 0 | 173970645 | 63221776  | 368   | 166615710 | 80761700  | 38347955 |
| 493,5 | 0 | 158110129 | 69490203  | 499   | 168834732 | 79287113  | 36674676 |
| 494,5 | 0 | 143235715 | 76072547  | 678   | 170386970 | 77939182  | 35328913 |
| 495,5 | 0 | 129366450 | 82941683  | 924   | 171269887 | 76715789  | 34294179 |
| 496,5 | 0 | 116504614 | 90064140  | 1261  | 171489028 | 75611809  | 33546709 |
| 497,5 | 0 | 104638053 | 97400103  | 1723  | 171057551 | 74619486  | 33057714 |
| 498,5 | 0 | 93742518  | 104903557 | 2359  | 169995635 | 73728814  | 32795763 |
| 499,5 | 0 | 83783937  | 112522581 | 3233  | 168329782 | 72927907  | 32728884 |
| 500,5 | 0 | 74720562  | 120199793 | 4432  | 166092046 | 72203367  | 32826125 |
| 501,5 | 0 | 66504944  | 127872948 | 6079  | 163319209 | 71540636  | 33058470 |
| 502,5 | 0 | 59085713  | 135475690 | 8338  | 160051934 | 70924335  | 33399176 |
| 503,5 | 0 | 52409147  | 142938439 | 11431 | 156333919 | 70338587  | 33823680 |
| 504,5 | 0 | 46420517  | 150189400 | 15660 | 152211053 | 69767326  | 34309275 |
| 505,5 | 0 | 41065219  | 157155685 | 21431 | 147730627 | 69194593  | 34834711 |



|       |   |          |           |          |           |          |          |
|-------|---|----------|-----------|----------|-----------|----------|----------|
| 506,5 | 0 | 36289693 | 163764513 | 29289    | 142940571 | 68604813 | 35379841 |
| 507,5 | 0 | 32042154 | 169944461 | 39958    | 137888770 | 67983069 | 35925371 |
| 508,5 | 0 | 28273145 | 175626751 | 54401    | 132622431 | 67315346 | 36452750 |
| 509,5 | 0 | 24935933 | 180746518 | 73890    | 127187533 | 66588775 | 36944184 |
| 510,5 | 0 | 21986775 | 185244049 | 100091   | 121628352 | 65791853 | 37382751 |
| 511,5 | 0 | 19385065 | 189065937 | 135175   | 115987050 | 64914645 | 37752594 |
| 512,5 | 0 | 17093390 | 192166143 | 181954   | 110303360 | 63948970 | 38039139 |
| 513,5 | 0 | 15077511 | 194506918 | 244037   | 104614321 | 62888557 | 38229331 |
| 514,5 | 0 | 13306276 | 196059563 | 326028   | 98954092  | 61729192 | 38311854 |
| 515,5 | 0 | 11751503 | 196805014 | 433743   | 93353832  | 60468819 | 38277309 |
| 516,5 | 0 | 10387819 | 196734227 | 574472   | 87841624  | 59107628 | 38118359 |
| 517,5 | 0 | 9192480  | 195848352 | 757262   | 82442463  | 57648111 | 37829808 |
| 518,5 | 0 | 8145185  | 194158700 | 993232   | 77178276  | 56095078 | 37408641 |
| 519,5 | 0 | 7227875  | 191686493 | 1295901  | 72067994  | 54455653 | 36853995 |
| 520,5 | 0 | 6424545  | 188462417 | 1681525  | 67127641  | 52739226 | 36167095 |
| 521,5 | 0 | 5721045  | 184525977 | 2169416  | 62370464  | 50957380 | 35351149 |
| 522,5 | 0 | 5104902  | 179924687 | 2782225  | 57807069  | 49123777 | 34411207 |
| 523,5 | 0 | 4565150  | 174713112 | 3546152  | 53445586  | 47254000 | 33354022 |
| 524,5 | 0 | 4092164  | 168951787 | 4491054  | 49291841  | 45365369 | 32187904 |
| 525,5 | 0 | 3677513  | 162706045 | 5650404  | 45349530  | 43476698 | 30922622 |
| 526,5 | 0 | 3313827  | 156044790 | 7061062  | 41620407  | 41608017 | 29569359 |
| 527,5 | 0 | 2994670  | 149039238 | 8762807  | 38104465  | 39780236 | 28140774 |
| 528,5 | 0 | 2714428  | 141761668 | 10797598 | 34800121  | 38014763 | 26651233 |
| 529,5 | 0 | 2468213  | 134284198 | 13208525 | 31704393  | 36333066 | 25117238 |
| 530,5 | 0 | 2251770  | 126677640 | 16038433 | 28813077  | 34756184 | 23558181 |
| 531,5 | 0 | 2061399  | 119010423 | 19328223 | 26120913  | 33304192 | 21997462 |
| 532,5 | 0 | 1893886  | 111347641 | 23114839 | 23621741  | 31995622 | 20464075 |
| 533,5 | 0 | 1746441  | 103750214 | 27429007 | 21308660  | 30846864 | 18994632 |
| 534,5 | 0 | 1616639  | 96274189  | 32292795 | 19174160  | 29871557 | 17635556 |
| 535,5 | 0 | 1502381  | 88970193  | 37717107 | 17210260  | 29079988 | 16444599 |
| 536,5 | 0 | 1401846  | 81883018  | 43699238 | 15408628  | 28478546 | 15489844 |
| 537,5 | 0 | 1313457  | 75051370  | 50220667 | 13760692  | 28069237 | 14843340 |

|       |      |         |          |           |          |          |          |
|-------|------|---------|----------|-----------|----------|----------|----------|
| 538,5 | 0    | 1235851 | 68507741 | 57245231  | 12257742 | 27849313 | 14567404 |
| 539,5 | 0    | 1167848 | 62278428 | 64717872  | 10891021 | 27811034 | 14696455 |
| 540,5 | 0    | 1108431 | 56383664 | 72564100  | 9651805  | 27941600 | 15223973 |
| 541,5 | 0    | 1056726 | 50837858 | 80690305  | 8531479  | 28223274 | 16103649 |
| 542,5 | 0    | 1011982 | 45649926 | 88985011  | 7521598  | 28633703 | 17263258 |
| 543,5 | 0    | 973558  | 40823699 | 97321088  | 6613939  | 29146457 | 18621333 |
| 544,5 | 0    | 940909  | 36358383 | 105558916 | 5800547  | 29731751 | 20098835 |
| 545,5 | 0    | 913576  | 32249069 | 113550388 | 5073776  | 30357362 | 21624551 |
| 546,5 | 0    | 891178  | 28487256 | 121143599 | 4426316  | 30989670 | 23136425 |
| 547,5 | 0    | 873401  | 25061397 | 128188003 | 3851217  | 31594804 | 24581166 |
| 548,5 | 0    | 859996  | 21957429 | 134539786 | 3341904  | 32139823 | 25913461 |
| 549,5 | 0    | 850770  | 19159297 | 140067151 | 2892193  | 32593882 | 27095358 |
| 550,5 | 0    | 845587  | 16649446 | 144655251 | 2496290  | 32929315 | 28095901 |
| 551,5 | 0    | 844358  | 14409284 | 148210466 | 2148797  | 33122581 | 28890979 |
| 552,5 | 0    | 847045  | 12419601 | 150663809 | 1844704  | 33155032 | 29463256 |
| 553,5 | 0    | 853657  | 10660945 | 151973273 | 1579388  | 33013453 | 29802109 |
| 554,5 | 0    | 864250  | 9113954  | 152125000 | 1348595  | 32690360 | 29903468 |
| 555,5 | 2    | 878926  | 7759632  | 151133234 | 1148435  | 32184046 | 29769526 |
| 556,5 | 3    | 897837  | 6579589  | 149039098 | 975361   | 31498378 | 29408300 |
| 557,5 | 5    | 921184  | 5556226  | 145908305 | 826155   | 30642375 | 28833020 |
| 558,5 | 8    | 949221  | 4672881  | 141827958 | 697909   | 29629596 | 28061387 |
| 559,5 | 14   | 982257  | 3913933  | 136902663 | 588006   | 28477375 | 27114723 |
| 560,5 | 23   | 1020660 | 3264872  | 131250179 | 494102   | 27205967 | 26017044 |
| 561,5 | 38   | 1064865 | 2712333  | 124996869 | 414106   | 25837642 | 24794113 |
| 562,5 | 63   | 1115373 | 2244110  | 118273171 | 346157   | 24395775 | 23472509 |
| 563,5 | 103  | 1172765 | 1849141  | 111209317 | 288610   | 22903987 | 22078753 |
| 564,5 | 168  | 1237705 | 1517472  | 103931470 | 240014   | 21385366 | 20638524 |
| 565,5 | 271  | 1310946 | 1240214  | 96558421  | 199096   | 19861790 | 19175990 |
| 566,5 | 436  | 1393346 | 1009481  | 89198921  | 164740   | 18353385 | 17713274 |
| 567,5 | 697  | 1485872 | 818324   | 81949714  | 135976   | 16878117 | 16270061 |
| 568,5 | 1107 | 1589614 | 660661   | 74894241  | 111961   | 15451517 | 14863338 |
| 569,5 | 1746 | 1705794 | 531201   | 68102003  | 91966    | 14086542 | 13507276 |

|       |          |          |        |          |       |          |          |
|-------|----------|----------|--------|----------|-------|----------|----------|
| 570,5 | 2735     | 1835783  | 425369 | 61628507 | 75364 | 12793552 | 12213220 |
| 571,5 | 4253     | 1981111  | 339235 | 55515702 | 61617 | 11580384 | 10989792 |
| 572,5 | 6566     | 2143483  | 269441 | 49792829 | 50263 | 10452516 | 9843069  |
| 573,5 | 10061    | 2324792  | 213136 | 44477556 | 40910 | 9413291  | 8776829  |
| 574,5 | 15300    | 2527135  | 167911 | 39577328 | 33225 | 8464180  | 7792847  |
| 575,5 | 23089    | 2752827  | 131745 | 35090820 | 26928 | 7605082  | 6891212  |
| 576,5 | 34570    | 3004416  | 102948 | 31009423 | 21779 | 6834627  | 6070677  |
| 577,5 | 51347    | 3284693  | 80119  | 27318703 | 17579 | 6150488  | 5329013  |
| 578,5 | 75648    | 3596706  | 62100  | 23999768 | 14162 | 5549677  | 4663370  |
| 579,5 | 110531   | 3943768  | 47938  | 21030524 | 11388 | 5028830  | 4070659  |
| 580,5 | 160147   | 4329462  | 36855  | 18386778 | 9141  | 4584477  | 3547942  |
| 581,5 | 230064   | 4757639  | 28220  | 16043197 | 7325  | 4213289  | 3092847  |
| 582,5 | 327658   | 5232417  | 21521  | 13974098 | 5860  | 3912311  | 2703984  |
| 583,5 | 462574   | 5758162  | 16346  | 12154089 | 4680  | 3679170  | 2381293  |
| 584,5 | 647259   | 6339477  | 12365  | 10558577 | 3733  | 3512282  | 2126158  |
| 585,5 | 897558   | 6981158  | 9316   | 9164130  | 2973  | 3411027  | 1940979  |
| 586,5 | 1233348  | 7688160  | 6991   | 7948742  | 2364  | 3375921  | 1827940  |
| 587,5 | 1679190  | 8465537  | 5224   | 6891997  | 1878  | 3408765  | 1787264  |
| 588,5 | 2264951  | 9318366  | 3889   | 5975152  | 1490  | 3512770  | 1816131  |
| 589,5 | 3026342  | 10251664 | 2883   | 5181161  | 1181  | 3692646  | 1909471  |
| 590,5 | 4005287  | 11270273 | 2129   | 4494646  | 935   | 3954654  | 2062363  |
| 591,5 | 5250048  | 12378740 | 1566   | 3901839  | 740   | 4306587  | 2272522  |
| 592,5 | 6814997  | 13581165 | 1147   | 3390490  | 585   | 4757677  | 2541753  |
| 593,5 | 8759933  | 14881039 | 837    | 2949764  | 462   | 5318407  | 2876244  |
| 594,5 | 11148844 | 16281057 | 608    | 2570128  | 365   | 6000200  | 3286054  |
| 595,5 | 14048019 | 17782921 | 440    | 2243229  | 288   | 6814980  | 3784121  |
| 596,5 | 17523465 | 19387123 | 317    | 1961785  | 227   | 7774583  | 4384976  |
| 597,5 | 21637601 | 21092727 | 228    | 1719462  | 179   | 8890039  | 5103339  |
| 598,5 | 26445280 | 22897137 | 163    | 1510775  | 141   | 10170699 | 5952724  |
| 599,5 | 31989242 | 24795883 | 116    | 1330985  | 111   | 11623267 | 6944124  |
| 600,5 | 38295199 | 26782407 | 82     | 1176007  | 88    | 13250757 | 8084831  |
| 601,5 | 45366811 | 28847878 | 58     | 1042329  | 69    | 15051429 | 9377384  |

|       |           |          |    |        |    |          |          |
|-------|-----------|----------|----|--------|----|----------|----------|
| 602,5 | 53180903  | 30981039 | 41 | 926935 | 55 | 17017795 | 10818655 |
| 603,5 | 61683314  | 33168095 | 29 | 827240 | 43 | 19135744 | 12399102 |
| 604,5 | 70785822  | 35392658 | 20 | 741031 | 34 | 21383913 | 14102240 |
| 605,5 | 80364540  | 37635761 | 14 | 666416 | 27 | 23733352 | 15904393 |
| 606,5 | 90260196  | 39875950 | 10 | 601779 | 21 | 26147591 | 17774805 |
| 607,5 | 100280545 | 42089455 | 7  | 545739 | 17 | 28583153 | 19676159 |
| 608,5 | 110205081 | 44250461 | 5  | 497119 | 13 | 30990536 | 21565532 |
| 609,5 | 119792031 | 46331475 | 3  | 454913 | 11 | 33315687 | 23395799 |
| 610,5 | 128787402 | 48303780 | 2  | 418265 | 8  | 35501892 | 25117428 |
| 611,5 | 136935688 | 50137992 | 1  | 386446 | 7  | 37492027 | 26680601 |
| 612,5 | 143991635 | 51804687 | 0  | 358834 | 5  | 39231032 | 28037543 |
| 613,5 | 149732350 | 53275099 | 0  | 334899 | 4  | 40668471 | 29144899 |
| 614,5 | 153968910 | 54521872 | 0  | 314194 | 3  | 41760996 | 29966026 |
| 615,5 | 156556654 | 55519822 | 0  | 296335 | 3  | 42474563 | 30473006 |
| 616,5 | 157403371 | 56246709 | 0  | 281000 | 2  | 42786216 | 30648239 |
| 617,5 | 156474736 | 56683965 | 0  | 267917 | 2  | 42685324 | 30485490 |
| 618,5 | 153796555 | 56817366 | 0  | 256857 | 1  | 42174156 | 29990300 |
| 619,5 | 149453614 | 56637604 | 0  | 247628 | 1  | 41267770 | 29179718 |
| 620,5 | 143585196 | 56140734 | 0  | 240074 | 0  | 39993201 | 28081371 |
| 621,5 | 136377609 | 55328471 | 0  | 234067 | 0  | 38388030 | 26731950 |
| 622,5 | 128054281 | 54208325 | 0  | 229505 | 0  | 36498422 | 25175206 |
| 623,5 | 118864157 | 52793542 | 0  | 226310 | 0  | 34376802 | 23459619 |
| 624,5 | 109069257 | 51102870 | 0  | 224428 | 0  | 32079311 | 21635902 |
| 625,5 | 98932266  | 49160130 | 0  | 223823 | 0  | 29663244 | 19754520 |
| 626,5 | 88704960  | 46993627 | 0  | 224479 | 0  | 27184613 | 17863378 |
| 627,5 | 78618188  | 44635406 | 0  | 226400 | 0  | 24695999 | 16005825 |
| 628,5 | 68873921  | 42120384 | 0  | 229609 | 0  | 22244783 | 14219080 |
| 629,5 | 59639682  | 39485404 | 0  | 234147 | 0  | 19871847 | 12533140 |
| 630,5 | 51045475  | 36768232 | 0  | 240076 | 0  | 17610756 | 10970203 |
| 631,5 | 43183107  | 34006553 | 0  | 247478 | 0  | 15487427 | 9544594  |
| 632,5 | 36107639  | 31237002 | 0  | 256458 | 0  | 13520220 | 8263159  |
| 633,5 | 29840582  | 28494262 | 0  | 267146 | 0  | 11720398 | 7126065  |

|       |          |          |   |         |   |          |         |
|-------|----------|----------|---|---------|---|----------|---------|
| 634,5 | 24374374 | 25810274 | 0 | 279700  | 0 | 10092869 | 6127922 |
| 635,5 | 19677645 | 23213574 | 0 | 294305  | 0 | 8637105  | 5259128 |
| 636,5 | 15700819 | 20728791 | 0 | 311181  | 0 | 7348158  | 4507317 |
| 637,5 | 12381624 | 18376302 | 0 | 330588  | 0 | 6217703  | 3858777 |
| 638,5 | 9650194  | 16172058 | 0 | 352825  | 0 | 5235016  | 3299691 |
| 639,5 | 7433532  | 14127574 | 0 | 378243  | 0 | 4387870  | 2817107 |
| 640,5 | 5659175  | 12250064 | 0 | 407246  | 0 | 3663297  | 2399557 |
| 641,5 | 4258026  | 10542704 | 0 | 440301  | 0 | 3048206  | 2037344 |
| 642,5 | 3166356  | 9005012  | 0 | 477949  | 0 | 2529863  | 1722548 |
| 643,5 | 2327056  | 7633294  | 0 | 520811  | 0 | 2096232  | 1448839 |
| 644,5 | 1690244  | 6421154  | 0 | 569598  | 0 | 1736199  | 1211211 |
| 645,5 | 1213354  | 5360023  | 0 | 625132  | 0 | 1439702  | 1005713 |
| 646,5 | 860840   | 4439693  | 0 | 688350  | 0 | 1197777  | 829229  |
| 647,5 | 603607   | 3648825  | 0 | 760328  | 0 | 1002552  | 679368  |
| 648,5 | 418298   | 2975429  | 0 | 842293  | 0 | 847204   | 554474  |
| 649,5 | 286496   | 2407275  | 0 | 935644  | 0 | 725883   | 453759  |
| 650,5 | 193934   | 1932261  | 0 | 1041975 | 0 | 633634   | 377458  |
| 651,5 | 129746   | 1538705  | 0 | 1163095 | 0 | 566309   | 326627  |
| 652,5 | 85792    | 1215572  | 0 | 1301054 | 0 | 520484   | 301927  |
| 653,5 | 56067    | 952642   | 0 | 1458166 | 0 | 493375   | 301648  |
| 654,5 | 36215    | 740610   | 0 | 1637041 | 0 | 482773   | 321276  |
| 655,5 | 23120    | 571151   | 0 | 1840604 | 0 | 486975   | 355587  |
| 656,5 | 14588    | 436921   | 0 | 2072130 | 0 | 504728   | 400692  |
| 657,5 | 9098     | 331540   | 0 | 2335262 | 0 | 535180   | 454498  |
| 658,5 | 5608     | 249542   | 0 | 2634041 | 0 | 577838   | 516284  |
| 659,5 | 3417     | 186302   | 0 | 2972922 | 0 | 632528   | 586196  |
| 660,5 | 2058     | 137960   | 0 | 3356790 | 0 | 699362   | 664889  |
| 661,5 | 1225     | 101331   | 0 | 3790967 | 0 | 778705   | 753319  |
| 662,5 | 721      | 73821    | 0 | 4281210 | 0 | 871150   | 852634  |
| 663,5 | 419      | 53342    | 0 | 4833697 | 0 | 977492   | 964106  |
| 664,5 | 241      | 38229    | 0 | 5454998 | 0 | 1098694  | 1089101 |
| 665,5 | 137      | 27175    | 0 | 6152028 | 0 | 1235868  | 1229051 |

|       |    |       |   |          |   |          |          |
|-------|----|-------|---|----------|---|----------|----------|
| 666,5 | 77 | 19159 | 0 | 6931980  | 0 | 1390243  | 1385439  |
| 667,5 | 43 | 13397 | 0 | 7802231  | 0 | 1563134  | 1559776  |
| 668,5 | 23 | 9292  | 0 | 8770223  | 0 | 1755908  | 1753580  |
| 669,5 | 13 | 6392  | 0 | 9843316  | 0 | 1969944  | 1968343  |
| 670,5 | 7  | 4361  | 0 | 11028604 | 0 | 2206594  | 2205503  |
| 671,5 | 4  | 2951  | 0 | 12332700 | 0 | 2467131  | 2466392  |
| 672,5 | 2  | 1981  | 0 | 13761489 | 0 | 2752694  | 2752199  |
| 673,5 | 0  | 1319  | 0 | 15319851 | 0 | 3064234  | 3063904  |
| 674,5 | 0  | 871   | 0 | 17011344 | 0 | 3402443  | 3402225  |
| 675,5 | 0  | 570   | 0 | 18837881 | 0 | 3767690  | 3767548  |
| 676,5 | 0  | 370   | 0 | 20799374 | 0 | 4159949  | 4159856  |
| 677,5 | 0  | 239   | 0 | 22893383 | 0 | 4578724  | 4578665  |
| 678,5 | 0  | 153   | 0 | 25114765 | 0 | 5022984  | 5022945  |
| 679,5 | 0  | 97    | 0 | 27455350 | 0 | 5491089  | 5491065  |
| 680,5 | 0  | 61    | 0 | 29903644 | 0 | 5980741  | 5980726  |
| 681,5 | 0  | 38    | 0 | 32444606 | 0 | 6488929  | 6488919  |
| 682,5 | 0  | 23    | 0 | 35059481 | 0 | 7011901  | 7011895  |
| 683,5 | 0  | 14    | 0 | 37725747 | 0 | 7545152  | 7545149  |
| 684,5 | 0  | 9     | 0 | 40417163 | 0 | 8083434  | 8083432  |
| 685,5 | 0  | 5     | 0 | 43103955 | 0 | 8620792  | 8620791  |
| 686,5 | 0  | 3     | 0 | 45753142 | 0 | 9150629  | 9150628  |
| 687,5 | 0  | 2     | 0 | 48329011 | 0 | 9665803  | 9665802  |
| 688,5 | 0  | 1     | 0 | 50793749 | 0 | 10158750 | 10158750 |
| 689,5 | 0  | 0     | 0 | 53108217 | 0 | 10621643 | 10621643 |
| 690,5 | 0  | 0     | 0 | 55232856 | 0 | 11046571 | 11046571 |
| 691,5 | 0  | 0     | 0 | 57128704 | 0 | 11425741 | 11425741 |
| 692,5 | 0  | 0     | 0 | 58758490 | 0 | 11751698 | 11751698 |
| 693,5 | 0  | 0     | 0 | 60087770 | 0 | 12017554 | 12017554 |
| 694,5 | 0  | 0     | 0 | 61086058 | 0 | 12217212 | 12217212 |
| 695,5 | 0  | 0     | 0 | 61727904 | 0 | 12345581 | 12345581 |
| 696,5 | 0  | 0     | 0 | 61993871 | 0 | 12398774 | 12398774 |
| 697,5 | 0  | 0     | 0 | 61871361 | 0 | 12374272 | 12374272 |

|       |   |   |   |          |   |          |          |
|-------|---|---|---|----------|---|----------|----------|
| 698,5 | 0 | 0 | 0 | 61355237 | 0 | 12271047 | 12271047 |
| 699,5 | 0 | 0 | 0 | 60448223 | 0 | 12089645 | 12089645 |
| 700,5 | 0 | 0 | 0 | 59161026 | 0 | 11832205 | 11832205 |
| 701,5 | 0 | 0 | 0 | 57512191 | 0 | 11502438 | 11502438 |
| 702,5 | 0 | 0 | 0 | 55527667 | 0 | 11105533 | 11105533 |
| 703,5 | 0 | 0 | 0 | 53240103 | 0 | 10648021 | 10648021 |
| 704,5 | 0 | 0 | 0 | 50687908 | 0 | 10137582 | 10137582 |
| 705,5 | 0 | 0 | 0 | 47914100 | 0 | 9582820  | 9582820  |
| 706,5 | 0 | 0 | 0 | 44965003 | 0 | 8993001  | 8993001  |
| 707,5 | 0 | 0 | 0 | 41888849 | 0 | 8377770  | 8377770  |
| 708,5 | 0 | 0 | 0 | 38734348 | 0 | 7746870  | 7746870  |
| 709,5 | 0 | 0 | 0 | 35549290 | 0 | 7109858  | 7109858  |
| 710,5 | 0 | 0 | 0 | 32379237 | 0 | 6475847  | 6475847  |
| 711,5 | 0 | 0 | 0 | 29266357 | 0 | 5853271  | 5853271  |
| 712,5 | 0 | 0 | 0 | 26248454 | 0 | 5249691  | 5249691  |
| 713,5 | 0 | 0 | 0 | 23358217 | 0 | 4671643  | 4671643  |
| 714,5 | 0 | 0 | 0 | 20622704 | 0 | 4124541  | 4124541  |
| 715,5 | 0 | 0 | 0 | 18063077 | 0 | 3612615  | 3612615  |
| 716,5 | 0 | 0 | 0 | 15694572 | 0 | 3138914  | 3138914  |
| 717,5 | 0 | 0 | 0 | 13526685 | 0 | 2705337  | 2705337  |
| 718,5 | 0 | 0 | 0 | 11563547 | 0 | 2312709  | 2312709  |
| 719,5 | 0 | 0 | 0 | 9804451  | 0 | 1960890  | 1960890  |
| 720,5 | 0 | 0 | 0 | 8244492  | 0 | 1648898  | 1648898  |
| 721,5 | 0 | 0 | 0 | 6875269  | 0 | 1375054  | 1375054  |
| 722,5 | 0 | 0 | 0 | 5685629  | 0 | 1137126  | 1137126  |
| 723,5 | 0 | 0 | 0 | 4662398  | 0 | 932480   | 932480   |
| 724,5 | 0 | 0 | 0 | 3791070  | 0 | 758214   | 758214   |
| 725,5 | 0 | 0 | 0 | 3056447  | 0 | 611290   | 611289   |
| 726,5 | 0 | 0 | 0 | 2443184  | 0 | 488637   | 488637   |
| 727,5 | 0 | 0 | 0 | 1936255  | 0 | 387251   | 387251   |
| 728,5 | 0 | 0 | 0 | 1521315  | 0 | 304263   | 304263   |
| 729,5 | 0 | 0 | 0 | 1184978  | 0 | 236996   | 236996   |

|       |   |   |   |        |    |        |        |
|-------|---|---|---|--------|----|--------|--------|
| 730,5 | 0 | 0 | 0 | 915001 | 0  | 183000 | 183000 |
| 731,5 | 0 | 0 | 0 | 700389 | 0  | 140078 | 140078 |
| 732,5 | 0 | 0 | 0 | 531434 | 0  | 106287 | 106287 |
| 733,5 | 0 | 0 | 0 | 399705 | 0  | 79941  | 79941  |
| 734,5 | 0 | 0 | 0 | 297988 | 0  | 59598  | 59598  |
| 735,5 | 0 | 0 | 0 | 220200 | 1  | 44040  | 44040  |
| 736,5 | 0 | 0 | 0 | 161280 | 1  | 32256  | 32256  |
| 737,5 | 0 | 0 | 0 | 117081 | 2  | 23416  | 23416  |
| 738,5 | 0 | 0 | 0 | 84240  | 2  | 16848  | 16848  |
| 739,5 | 0 | 0 | 0 | 60072  | 2  | 12015  | 12014  |
| 740,5 | 0 | 0 | 0 | 42456  | 3  | 8492   | 8491   |
| 741,5 | 0 | 0 | 0 | 29738  | 3  | 5948   | 5947   |
| 742,5 | 0 | 0 | 0 | 20644  | 4  | 4129   | 4129   |
| 743,5 | 0 | 0 | 0 | 14202  | 4  | 2841   | 2840   |
| 744,5 | 0 | 0 | 0 | 9683   | 5  | 1938   | 1936   |
| 745,5 | 0 | 0 | 0 | 6543   | 6  | 1310   | 1308   |
| 746,5 | 0 | 0 | 0 | 4381   | 7  | 878    | 876    |
| 747,5 | 0 | 0 | 0 | 2907   | 9  | 583    | 581    |
| 748,5 | 0 | 0 | 0 | 1912   | 10 | 384    | 382    |
| 749,5 | 0 | 0 | 0 | 1246   | 12 | 252    | 249    |
| 750,5 | 0 | 0 | 0 | 805    | 14 | 164    | 160    |
| 751,5 | 0 | 0 | 0 | 515    | 17 | 106    | 102    |
| 752,5 | 0 | 0 | 0 | 327    | 20 | 69     | 64     |
| 753,5 | 0 | 0 | 0 | 205    | 24 | 46     | 40     |
| 754,5 | 0 | 0 | 0 | 128    | 29 | 31     | 25     |
| 755,5 | 0 | 0 | 0 | 79     | 34 | 23     | 16     |
| 756,5 | 0 | 0 | 0 | 48     | 41 | 18     | 11     |
| 757,5 | 0 | 0 | 0 | 29     | 49 | 16     | 10     |
| 758,5 | 0 | 0 | 0 | 18     | 58 | 15     | 11     |
| 759,5 | 0 | 0 | 0 | 10     | 69 | 16     | 14     |
| 760,5 | 0 | 0 | 0 | 6      | 83 | 18     | 16     |
| 761,5 | 0 | 0 | 0 | 4      | 99 | 20     | 20     |



|       |   |   |   |   |       |      |      |
|-------|---|---|---|---|-------|------|------|
| 762,5 | 0 | 0 | 0 | 2 | 118   | 24   | 23   |
| 763,5 | 0 | 0 | 0 | 1 | 140   | 28   | 28   |
| 764,5 | 0 | 0 | 0 | 0 | 167   | 34   | 33   |
| 765,5 | 0 | 0 | 0 | 0 | 199   | 40   | 40   |
| 766,5 | 0 | 0 | 0 | 0 | 238   | 48   | 48   |
| 767,5 | 0 | 0 | 0 | 0 | 283   | 57   | 57   |
| 768,5 | 0 | 0 | 0 | 0 | 337   | 67   | 67   |
| 769,5 | 0 | 0 | 0 | 0 | 402   | 80   | 80   |
| 770,5 | 0 | 0 | 0 | 0 | 478   | 96   | 96   |
| 771,5 | 0 | 0 | 0 | 0 | 569   | 114  | 114  |
| 772,5 | 0 | 0 | 0 | 0 | 677   | 135  | 135  |
| 773,5 | 0 | 0 | 0 | 0 | 805   | 161  | 161  |
| 774,5 | 0 | 0 | 0 | 0 | 957   | 191  | 191  |
| 775,5 | 0 | 0 | 0 | 0 | 1138  | 228  | 228  |
| 776,5 | 0 | 0 | 0 | 0 | 1352  | 270  | 270  |
| 777,5 | 0 | 0 | 0 | 0 | 1605  | 321  | 321  |
| 778,5 | 0 | 0 | 0 | 0 | 1904  | 381  | 381  |
| 779,5 | 0 | 0 | 0 | 0 | 2258  | 452  | 452  |
| 780,5 | 0 | 0 | 0 | 0 | 2677  | 535  | 535  |
| 781,5 | 0 | 0 | 0 | 0 | 3171  | 634  | 634  |
| 782,5 | 0 | 0 | 0 | 0 | 3754  | 751  | 751  |
| 783,5 | 0 | 0 | 0 | 0 | 4441  | 888  | 888  |
| 784,5 | 0 | 0 | 0 | 0 | 5251  | 1050 | 1050 |
| 785,5 | 0 | 0 | 0 | 0 | 6203  | 1241 | 1241 |
| 786,5 | 0 | 0 | 0 | 0 | 7323  | 1465 | 1465 |
| 787,5 | 0 | 0 | 0 | 0 | 8638  | 1728 | 1728 |
| 788,5 | 0 | 0 | 0 | 0 | 10181 | 2036 | 2036 |
| 789,5 | 0 | 0 | 0 | 0 | 11990 | 2398 | 2398 |
| 790,5 | 0 | 0 | 0 | 0 | 14108 | 2822 | 2822 |
| 791,5 | 0 | 0 | 0 | 0 | 16586 | 3317 | 3317 |
| 792,5 | 0 | 0 | 0 | 0 | 19481 | 3896 | 3896 |
| 793,5 | 0 | 0 | 0 | 0 | 22860 | 4572 | 4572 |

|       |   |   |   |   |         |        |        |
|-------|---|---|---|---|---------|--------|--------|
| 794,5 | 0 | 0 | 0 | 0 | 26799   | 5360   | 5360   |
| 795,5 | 0 | 0 | 0 | 0 | 31386   | 6277   | 6277   |
| 796,5 | 0 | 0 | 0 | 0 | 36720   | 7344   | 7344   |
| 797,5 | 0 | 0 | 0 | 0 | 42917   | 8583   | 8583   |
| 798,5 | 0 | 0 | 0 | 0 | 50105   | 10021  | 10021  |
| 799,5 | 0 | 0 | 0 | 0 | 58433   | 11687  | 11687  |
| 800,5 | 0 | 0 | 0 | 0 | 68069   | 13614  | 13614  |
| 801,5 | 0 | 0 | 0 | 0 | 79203   | 15841  | 15841  |
| 802,5 | 0 | 0 | 0 | 0 | 92051   | 18410  | 18410  |
| 803,5 | 0 | 0 | 0 | 0 | 106855  | 21371  | 21371  |
| 804,5 | 0 | 0 | 0 | 0 | 123888  | 24778  | 24778  |
| 805,5 | 0 | 0 | 0 | 0 | 143456  | 28691  | 28691  |
| 806,5 | 0 | 0 | 0 | 0 | 165905  | 33181  | 33181  |
| 807,5 | 0 | 0 | 0 | 0 | 191618  | 38324  | 38324  |
| 808,5 | 0 | 0 | 0 | 0 | 221024  | 44205  | 44205  |
| 809,5 | 0 | 0 | 0 | 0 | 254600  | 50920  | 50920  |
| 810,5 | 0 | 0 | 0 | 0 | 292875  | 58575  | 58575  |
| 811,5 | 0 | 0 | 0 | 0 | 336435  | 67287  | 67287  |
| 812,5 | 0 | 0 | 0 | 0 | 385925  | 77185  | 77185  |
| 813,5 | 0 | 0 | 0 | 0 | 442058  | 88412  | 88412  |
| 814,5 | 0 | 0 | 0 | 0 | 505614  | 101123 | 101123 |
| 815,5 | 0 | 0 | 0 | 0 | 577447  | 115489 | 115489 |
| 816,5 | 0 | 0 | 0 | 0 | 658489  | 131698 | 131698 |
| 817,5 | 0 | 0 | 0 | 0 | 749752  | 149950 | 149950 |
| 818,5 | 0 | 0 | 0 | 0 | 852333  | 170467 | 170467 |
| 819,5 | 0 | 0 | 0 | 0 | 967419  | 193484 | 193484 |
| 820,5 | 0 | 0 | 0 | 0 | 1096283 | 219257 | 219257 |
| 821,5 | 0 | 0 | 0 | 0 | 1240293 | 248059 | 248059 |
| 822,5 | 0 | 0 | 0 | 0 | 1400907 | 280181 | 280181 |
| 823,5 | 0 | 0 | 0 | 0 | 1579677 | 315935 | 315935 |
| 824,5 | 0 | 0 | 0 | 0 | 1778244 | 355649 | 355649 |
| 825,5 | 0 | 0 | 0 | 0 | 1998338 | 399668 | 399668 |

|       |   |   |   |   |          |         |         |
|-------|---|---|---|---|----------|---------|---------|
| 826,5 | 0 | 0 | 0 | 0 | 2241773  | 448355  | 448355  |
| 827,5 | 0 | 0 | 0 | 0 | 2510441  | 502088  | 502088  |
| 828,5 | 0 | 0 | 0 | 0 | 2806304  | 561261  | 561261  |
| 829,5 | 0 | 0 | 0 | 0 | 3131386  | 626277  | 626277  |
| 830,5 | 0 | 0 | 0 | 0 | 3487757  | 697551  | 697551  |
| 831,5 | 0 | 0 | 0 | 0 | 3877525  | 775505  | 775505  |
| 832,5 | 0 | 0 | 0 | 0 | 4302814  | 860563  | 860563  |
| 833,5 | 0 | 0 | 0 | 0 | 4765749  | 953150  | 953150  |
| 834,5 | 0 | 0 | 0 | 0 | 5268433  | 1053687 | 1053687 |
| 835,5 | 0 | 0 | 0 | 0 | 5812924  | 1162585 | 1162585 |
| 836,5 | 0 | 0 | 0 | 0 | 6401208  | 1280242 | 1280242 |
| 837,5 | 0 | 0 | 0 | 0 | 7035170  | 1407034 | 1407034 |
| 838,5 | 0 | 0 | 0 | 0 | 7716566  | 1543313 | 1543313 |
| 839,5 | 0 | 0 | 0 | 0 | 8446986  | 1689397 | 1689397 |
| 840,5 | 0 | 0 | 0 | 0 | 9227823  | 1845565 | 1845565 |
| 841,5 | 0 | 0 | 0 | 0 | 10060234 | 2012047 | 2012047 |
| 842,5 | 0 | 0 | 0 | 0 | 10945108 | 2189022 | 2189022 |
| 843,5 | 0 | 0 | 0 | 0 | 11883020 | 2376604 | 2376604 |
| 844,5 | 0 | 0 | 0 | 0 | 12874201 | 2574840 | 2574840 |
| 845,5 | 0 | 0 | 0 | 0 | 13918498 | 2783700 | 2783700 |
| 846,5 | 0 | 0 | 0 | 0 | 15015338 | 3003068 | 3003068 |
| 847,5 | 0 | 0 | 0 | 0 | 16163691 | 3232738 | 3232738 |
| 848,5 | 0 | 0 | 0 | 0 | 17362044 | 3472409 | 3472409 |
| 849,5 | 0 | 0 | 0 | 0 | 18608368 | 3721674 | 3721674 |
| 850,5 | 0 | 0 | 0 | 0 | 19900096 | 3980019 | 3980019 |
| 851,5 | 0 | 0 | 0 | 0 | 21234104 | 4246821 | 4246821 |
| 852,5 | 0 | 0 | 0 | 0 | 22606695 | 4521339 | 4521339 |
| 853,5 | 0 | 0 | 0 | 0 | 24013593 | 4802719 | 4802719 |
| 854,5 | 0 | 0 | 0 | 0 | 25449943 | 5089989 | 5089989 |
| 855,5 | 0 | 0 | 0 | 0 | 26910318 | 5382064 | 5382064 |
| 856,5 | 0 | 0 | 0 | 0 | 28388732 | 5677746 | 5677746 |
| 857,5 | 0 | 0 | 0 | 0 | 29878669 | 5975734 | 5975734 |

|       |   |   |   |   |          |         |         |
|-------|---|---|---|---|----------|---------|---------|
| 858,5 | 0 | 0 | 0 | 0 | 31373109 | 6274622 | 6274622 |
| 859,5 | 0 | 0 | 0 | 0 | 32864573 | 6572915 | 6572915 |
| 860,5 | 0 | 0 | 0 | 0 | 34345175 | 6869035 | 6869035 |
| 861,5 | 0 | 0 | 0 | 0 | 35806676 | 7161335 | 7161335 |
| 862,5 | 0 | 0 | 0 | 0 | 37240555 | 7448111 | 7448111 |
| 863,5 | 0 | 0 | 0 | 0 | 38638080 | 7727616 | 7727616 |
| 864,5 | 0 | 0 | 0 | 0 | 39990396 | 7998079 | 7998079 |
| 865,5 | 0 | 0 | 0 | 0 | 41288605 | 8257721 | 8257721 |
| 866,5 | 0 | 0 | 0 | 0 | 42523864 | 8504773 | 8504773 |
| 867,5 | 0 | 0 | 0 | 0 | 43687478 | 8737496 | 8737496 |
| 868,5 | 0 | 0 | 0 | 0 | 44771002 | 8954200 | 8954200 |
| 869,5 | 0 | 0 | 0 | 0 | 45766335 | 9153267 | 9153267 |
| 870,5 | 0 | 0 | 0 | 0 | 46665824 | 9333165 | 9333165 |
| 871,5 | 0 | 0 | 0 | 0 | 47462359 | 9492472 | 9492472 |
| 872,5 | 0 | 0 | 0 | 0 | 48149461 | 9629892 | 9629892 |
| 873,5 | 0 | 0 | 0 | 0 | 48721373 | 9744275 | 9744275 |
| 874,5 | 0 | 0 | 0 | 0 | 49173138 | 9834628 | 9834628 |
| 875,5 | 0 | 0 | 0 | 0 | 49500667 | 9900133 | 9900133 |
| 876,5 | 0 | 0 | 0 | 0 | 49700803 | 9940161 | 9940161 |
| 877,5 | 0 | 0 | 0 | 0 | 49771367 | 9954273 | 9954273 |
| 878,5 | 0 | 0 | 0 | 0 | 49711194 | 9942239 | 9942239 |
| 879,5 | 0 | 0 | 0 | 0 | 49520160 | 9904032 | 9904032 |
| 880,5 | 0 | 0 | 0 | 0 | 49199187 | 9839837 | 9839837 |
| 881,5 | 0 | 0 | 0 | 0 | 48750241 | 9750048 | 9750048 |
| 882,5 | 0 | 0 | 0 | 0 | 48176312 | 9635262 | 9635262 |
| 883,5 | 0 | 0 | 0 | 0 | 47481383 | 9496277 | 9496277 |
| 884,5 | 0 | 0 | 0 | 0 | 46670379 | 9334076 | 9334076 |
| 885,5 | 0 | 0 | 0 | 0 | 45749116 | 9149823 | 9149823 |
| 886,5 | 0 | 0 | 0 | 0 | 44724224 | 8944845 | 8944845 |
| 887,5 | 0 | 0 | 0 | 0 | 43603066 | 8720613 | 8720613 |
| 888,5 | 0 | 0 | 0 | 0 | 42393652 | 8478730 | 8478730 |
| 889,5 | 0 | 0 | 0 | 0 | 41104539 | 8220908 | 8220908 |

|       |   |   |   |   |          |         |         |
|-------|---|---|---|---|----------|---------|---------|
| 890,5 | 0 | 0 | 0 | 0 | 39744726 | 7948945 | 7948945 |
| 891,5 | 0 | 0 | 0 | 0 | 38323549 | 7664710 | 7664710 |
| 892,5 | 0 | 0 | 0 | 0 | 36850570 | 7370114 | 7370114 |
| 893,5 | 0 | 0 | 0 | 0 | 35335468 | 7067094 | 7067094 |
| 894,5 | 0 | 0 | 0 | 0 | 33787928 | 6757586 | 6757586 |
| 895,5 | 0 | 0 | 0 | 0 | 32217541 | 6443508 | 6443508 |
| 896,5 | 0 | 0 | 0 | 0 | 30633698 | 6126740 | 6126740 |
| 897,5 | 0 | 0 | 0 | 0 | 29045498 | 5809100 | 5809100 |
| 898,5 | 0 | 0 | 0 | 0 | 27461665 | 5492333 | 5492333 |
| 899,5 | 0 | 0 | 0 | 0 | 25890464 | 5178093 | 5178093 |
| 900,5 | 0 | 0 | 0 | 0 | 24339641 | 4867928 | 4867928 |
| 901,5 | 0 | 0 | 0 | 0 | 22816357 | 4563271 | 4563271 |
| 902,5 | 0 | 0 | 0 | 0 | 21327149 | 4265430 | 4265430 |
| 903,5 | 0 | 0 | 0 | 0 | 19877890 | 3975578 | 3975578 |
| 904,5 | 0 | 0 | 0 | 0 | 18473765 | 3694753 | 3694753 |
| 905,5 | 0 | 0 | 0 | 0 | 17119259 | 3423852 | 3423852 |
| 906,5 | 0 | 0 | 0 | 0 | 15818154 | 3163631 | 3163631 |
| 907,5 | 0 | 0 | 0 | 0 | 14573530 | 2914706 | 2914706 |
| 908,5 | 0 | 0 | 0 | 0 | 13387789 | 2677558 | 2677558 |
| 909,5 | 0 | 0 | 0 | 0 | 12262673 | 2452535 | 2452535 |
| 910,5 | 0 | 0 | 0 | 0 | 11199296 | 2239859 | 2239859 |
| 911,5 | 0 | 0 | 0 | 0 | 10198181 | 2039636 | 2039636 |
| 912,5 | 0 | 0 | 0 | 0 | 9259307  | 1851861 | 1851861 |
| 913,5 | 0 | 0 | 0 | 0 | 8382146  | 1676429 | 1676429 |
| 914,5 | 0 | 0 | 0 | 0 | 7565722  | 1513144 | 1513144 |
| 915,5 | 0 | 0 | 0 | 0 | 6808656  | 1361731 | 1361731 |
| 916,5 | 0 | 0 | 0 | 0 | 6109220  | 1221844 | 1221844 |
| 917,5 | 0 | 0 | 0 | 0 | 5465389  | 1093078 | 1093078 |
| 918,5 | 0 | 0 | 0 | 0 | 4874891  | 974978  | 974978  |
| 919,5 | 0 | 0 | 0 | 0 | 4335259  | 867052  | 867052  |
| 920,5 | 0 | 0 | 0 | 0 | 3843875  | 768775  | 768775  |
| 921,5 | 0 | 0 | 0 | 0 | 3398016  | 679603  | 679603  |

|       |   |   |   |   |         |        |        |
|-------|---|---|---|---|---------|--------|--------|
| 922,5 | 0 | 0 | 0 | 0 | 2994893 | 598979 | 598979 |
| 923,5 | 0 | 0 | 0 | 0 | 2631691 | 526338 | 526338 |
| 924,5 | 0 | 0 | 0 | 0 | 2305601 | 461120 | 461120 |
| 925,5 | 0 | 0 | 0 | 0 | 2013851 | 402770 | 402770 |
| 926,5 | 0 | 0 | 0 | 0 | 1753728 | 350746 | 350746 |
| 927,5 | 0 | 0 | 0 | 0 | 1522606 | 304521 | 304521 |
| 928,5 | 0 | 0 | 0 | 0 | 1317957 | 263591 | 263591 |
| 929,5 | 0 | 0 | 0 | 0 | 1137369 | 227474 | 227474 |
| 930,5 | 0 | 0 | 0 | 0 | 978558  | 195712 | 195712 |
| 931,5 | 0 | 0 | 0 | 0 | 839374  | 167875 | 167875 |
| 932,5 | 0 | 0 | 0 | 0 | 717805  | 143561 | 143561 |
| 933,5 | 0 | 0 | 0 | 0 | 611980  | 122396 | 122396 |
| 934,5 | 0 | 0 | 0 | 0 | 520173  | 104035 | 104035 |
| 935,5 | 0 | 0 | 0 | 0 | 440794  | 88159  | 88159  |
| 936,5 | 0 | 0 | 0 | 0 | 372392  | 74478  | 74478  |
| 937,5 | 0 | 0 | 0 | 0 | 313646  | 62729  | 62729  |
| 938,5 | 0 | 0 | 0 | 0 | 263362  | 52672  | 52672  |
| 939,5 | 0 | 0 | 0 | 0 | 220465  | 44093  | 44093  |
| 940,5 | 0 | 0 | 0 | 0 | 183991  | 36798  | 36798  |
| 941,5 | 0 | 0 | 0 | 0 | 153083  | 30617  | 30617  |
| 942,5 | 0 | 0 | 0 | 0 | 126977  | 25395  | 25395  |
| 943,5 | 0 | 0 | 0 | 0 | 105000  | 21000  | 21000  |
| 944,5 | 0 | 0 | 0 | 0 | 86562   | 17312  | 17312  |
| 945,5 | 0 | 0 | 0 | 0 | 71142   | 14228  | 14228  |
| 946,5 | 0 | 0 | 0 | 0 | 58290   | 11658  | 11658  |
| 947,5 | 0 | 0 | 0 | 0 | 47613   | 9523   | 9523   |
| 948,5 | 0 | 0 | 0 | 0 | 38773   | 7755   | 7755   |
| 949,5 | 0 | 0 | 0 | 0 | 31476   | 6295   | 6295   |
| 950,5 | 0 | 0 | 0 | 0 | 25475   | 5095   | 5095   |
| 951,5 | 0 | 0 | 0 | 0 | 20554   | 4111   | 4111   |
| 952,5 | 0 | 0 | 0 | 0 | 16533   | 3307   | 3307   |
| 953,5 | 0 | 0 | 0 | 0 | 13257   | 2651   | 2651   |

|       |   |   |   |   |       |      |      |
|-------|---|---|---|---|-------|------|------|
| 954,5 | 0 | 0 | 0 | 0 | 10598 | 2120 | 2120 |
| 955,5 | 0 | 0 | 0 | 0 | 8446  | 1689 | 1689 |
| 956,5 | 0 | 0 | 0 | 0 | 6711  | 1342 | 1342 |
| 957,5 | 0 | 0 | 0 | 0 | 5315  | 1063 | 1063 |
| 958,5 | 0 | 0 | 0 | 0 | 4197  | 839  | 839  |
| 959,5 | 0 | 0 | 0 | 0 | 3304  | 661  | 661  |
| 960,5 | 0 | 0 | 0 | 0 | 2593  | 519  | 519  |
| 961,5 | 0 | 0 | 0 | 0 | 2028  | 406  | 406  |
| 962,5 | 0 | 0 | 0 | 0 | 1582  | 316  | 316  |
| 963,5 | 0 | 0 | 0 | 0 | 1230  | 246  | 246  |
| 964,5 | 0 | 0 | 0 | 0 | 953   | 191  | 191  |
| 965,5 | 0 | 0 | 0 | 0 | 737   | 147  | 147  |
| 966,5 | 0 | 0 | 0 | 0 | 568   | 114  | 114  |
| 967,5 | 0 | 0 | 0 | 0 | 436   | 87   | 87   |
| 968,5 | 0 | 0 | 0 | 0 | 334   | 67   | 67   |
| 969,5 | 0 | 0 | 0 | 0 | 255   | 51   | 51   |
| 970,5 | 0 | 0 | 0 | 0 | 194   | 39   | 39   |
| 971,5 | 0 | 0 | 0 | 0 | 147   | 29   | 29   |
| 972,5 | 0 | 0 | 0 | 0 | 111   | 22   | 22   |
| 973,5 | 0 | 0 | 0 | 0 | 84    | 17   | 17   |
| 974,5 | 0 | 0 | 0 | 0 | 63    | 13   | 13   |
| 975,5 | 0 | 0 | 0 | 0 | 47    | 9    | 9    |
| 976,5 | 0 | 0 | 0 | 0 | 35    | 7    | 7    |
| 977,5 | 0 | 0 | 0 | 0 | 26    | 5    | 5    |
| 978,5 | 0 | 0 | 0 | 0 | 19    | 4    | 4    |
| 979,5 | 0 | 0 | 0 | 0 | 14    | 3    | 3    |
| 980,5 | 0 | 0 | 0 | 0 | 11    | 2    | 2    |
| 981,5 | 0 | 0 | 0 | 0 | 8     | 2    | 2    |
| 982,5 | 0 | 0 | 0 | 0 | 6     | 1    | 1    |
| 983,5 | 0 | 0 | 0 | 0 | 4     | 0    | 0    |
| 984,5 | 0 | 0 | 0 | 0 | 3     | 0    | 0    |
| 985,5 | 0 | 0 | 0 | 0 | 2     | 0    | 0    |

|       |   |   |   |   |   |   |   |
|-------|---|---|---|---|---|---|---|
| 986,5 | 0 | 0 | 0 | 0 | 2 | 0 | 0 |
| 987,5 | 0 | 0 | 0 | 0 | 1 | 0 | 0 |
| 988,5 | 0 | 0 | 0 | 0 | 0 | 0 | 0 |
| 989,5 | 0 | 0 | 0 | 0 | 0 | 0 | 0 |
| 990,5 | 0 | 0 | 0 | 0 | 0 | 0 | 0 |
| 991,5 | 0 | 0 | 0 | 0 | 0 | 0 | 0 |
| 992,5 | 0 | 0 | 0 | 0 | 0 | 0 | 0 |
| 993,5 | 0 | 0 | 0 | 0 | 0 | 0 | 0 |
| 994,5 | 0 | 0 | 0 | 0 | 0 | 0 | 0 |
| 995,5 | 0 | 0 | 0 | 0 | 0 | 0 | 0 |
| 996,5 | 0 | 0 | 0 | 0 | 0 | 0 | 0 |
| 997,5 | 0 | 0 | 0 | 0 | 0 | 0 | 0 |
| 998,5 | 0 | 0 | 0 | 0 | 0 | 0 | 0 |
| 999,5 | 0 | 0 | 0 | 0 | 0 | 0 | 0 |



| Figure 1b (f-NTA) |                                |                                |                                |                                |                                |                       |                |
|-------------------|--------------------------------|--------------------------------|--------------------------------|--------------------------------|--------------------------------|-----------------------|----------------|
| size (nm)         | Concentration (particles / ml) | Concentration average | Standard Error |
| 0,5               | 0                              | 0                              | 0                              | 0                              | 0                              | 0                     | 0              |
| 1,5               | 0                              | 0                              | 0                              | 0                              | 0                              | 0                     | 0              |
| 2,5               | 0                              | 0                              | 0                              | 0                              | 0                              | 0                     | 0              |
| 3,5               | 0                              | 0                              | 0                              | 0                              | 0                              | 0                     | 0              |
| 4,5               | 0                              | 0                              | 0                              | 0                              | 0                              | 0                     | 0              |
| 5,5               | 0                              | 0                              | 0                              | 0                              | 0                              | 0                     | 0              |
| 6,5               | 0                              | 0                              | 0                              | 0                              | 0                              | 0                     | 0              |
| 7,5               | 0                              | 0                              | 0                              | 0                              | 0                              | 0                     | 0              |
| 8,5               | 0                              | 0                              | 0                              | 0                              | 0                              | 0                     | 0              |
| 9,5               | 0                              | 0                              | 0                              | 0                              | 0                              | 0                     | 0              |
| 10,5              | 0                              | 0                              | 0                              | 0                              | 0                              | 0                     | 0              |
| 11,5              | 0                              | 0                              | 0                              | 0                              | 0                              | 0                     | 0              |
| 12,5              | 0                              | 0                              | 0                              | 17                             | 14                             | 6                     | 4              |
| 13,5              | 1                              | 12                             | 0                              | 259                            | 182                            | 91                    | 54             |
| 14,5              | 40                             | 288                            | 7                              | 2566                           | 1627                           | 906                   | 511            |
| 15,5              | 688                            | 3894                           | 125                            | 17923                          | 10493                          | 6625                  | 3373           |
| 16,5              | 7010                           | 32312                          | 1344                           | 92412                          | 51279                          | 36871                 | 16533          |
| 17,5              | 46446                          | 177622                         | 9954                           | 365887                         | 197856                         | 159553                | 63064          |
| 18,5              | 216816                         | 690554                         | 53511                          | 1150874                        | 623466                         | 547044                | 192830         |
| 19,5              | 761093                         | 2009128                        | 218773                         | 2962527                        | 1650276                        | 1520359               | 479908         |
| 20,5              | 2118178                        | 4594994                        | 708225                         | 6406872                        | 3757251                        | 3517104               | 985319         |
| 21,5              | 4877703                        | 8623037                        | 1880476                        | 11916231                       | 7507299                        | 6960949               | 1699514        |
| 22,5              | 9618655                        | 13783896                       | 4223320                        | 19464906                       | 13392661                       | 12096688              | 2519399        |
| 23,5              | 16696922                       | 19387153                       | 8241490                        | 28456738                       | 21650205                       | 18886502              | 3298399        |
| 24,5              | 26086710                       | 24673215                       | 14304547                       | 37872551                       | 32126874                       | 27012779              | 3949170        |
| 25,5              | 37348581                       | 29097018                       | 22532921                       | 46593276                       | 44257715                       | 35965902              | 4534499        |
| 26,5              | 49728798                       | 32438905                       | 32772718                       | 53722992                       | 57167092                       | 45166101              | 5261368        |

|      |           |           |           |           |           |           |          |
|------|-----------|-----------|-----------|-----------|-----------|-----------|----------|
| 27,5 | 62338860  | 34756929  | 44653517  | 58774811  | 69851362  | 54075096  | 6329397  |
| 28,5 | 74344449  | 36270566  | 57685328  | 61686856  | 81376086  | 62272657  | 7772273  |
| 29,5 | 85106686  | 37251843  | 71348945  | 62719142  | 91028714  | 69491066  | 9477331  |
| 30,5 | 94249267  | 37955723  | 85154720  | 62308188  | 98396079  | 75612796  | 11297150 |
| 31,5 | 101655188 | 38589062  | 98667491  | 60938102  | 103366806 | 80643330  | 13114081 |
| 32,5 | 107415507 | 39304939  | 111508544 | 59054728  | 106079389 | 84672622  | 14849509 |
| 33,5 | 111757440 | 40209347  | 123348400 | 57023974  | 106843667 | 87836566  | 16450435 |
| 34,5 | 114973971 | 41371605  | 133900819 | 55122895  | 106059867 | 90285831  | 17874039 |
| 35,5 | 117367812 | 42834185  | 142923147 | 53549737  | 104150834 | 92165143  | 19078652 |
| 36,5 | 119213944 | 44620365  | 150223296 | 52441946  | 101514164 | 93602743  | 20022357 |
| 37,5 | 120739164 | 46739595  | 155670521 | 51895192  | 98494321  | 94707759  | 20666750 |
| 38,5 | 122114492 | 49191021  | 159205778 | 51979903  | 95371089  | 95572457  | 20982455 |
| 39,5 | 123455892 | 51965739  | 160847725 | 52753965  | 92359427  | 96276550  | 20953712 |
| 40,5 | 124829605 | 55048281  | 160691802 | 54271435  | 89616074  | 96891439  | 20580662 |
| 41,5 | 126259546 | 58417714  | 158901721 | 56587525  | 87249233  | 97483148  | 19879154 |
| 42,5 | 127735273 | 62048595  | 155694565 | 59760128  | 85328861  | 98113485  | 18878737 |
| 43,5 | 129219807 | 65911915  | 151321914 | 63848073  | 83896090  | 98839560  | 17620014 |
| 44,5 | 130657035 | 69976080  | 146049935 | 68906160  | 82971081  | 99712058  | 16152836 |
| 45,5 | 131978639 | 74207918  | 140141108 | 74977077  | 82559103  | 100772769 | 14537054 |
| 46,5 | 133110551 | 78573660  | 133839488 | 82080535  | 82654943  | 102051836 | 12847988 |
| 47,5 | 133978898 | 83039847  | 127360474 | 90200431  | 83245867  | 103565104 | 11189260 |
| 48,5 | 134515352 | 87574102  | 120885136 | 99271526  | 84313437  | 105311910 | 9714469  |
| 49,5 | 134661712 | 92145721  | 114558546 | 109167848 | 85834479  | 107273661 | 8646548  |
| 50,5 | 134373579 | 96726087  | 108491185 | 119695537 | 87781472  | 109413572 | 8241637  |
| 51,5 | 133622928 | 101288870 | 102762388 | 130592912 | 90122614  | 111677942 | 8635423  |
| 52,5 | 132399507 | 105810070 | 97424921  | 141539827 | 92821759  | 113999217 | 9714191  |
| 53,5 | 130711018 | 110267915 | 92509928  | 152176906 | 95838413  | 116300836 | 11215748 |
| 54,5 | 128582163 | 114642651 | 88031727  | 162133251 | 99127922  | 118503543 | 12891825 |
| 55,5 | 126052701 | 118916287 | 83992133  | 171059099 | 102641926 | 120532429 | 14562440 |
| 56,5 | 123174752 | 123072322 | 80384153  | 178658474 | 106329152 | 122323771 | 16108449 |
| 57,5 | 120009623 | 127095486 | 77194994  | 184716477 | 110136523 | 123830621 | 17456742 |
| 58,5 | 116624438 | 130971548 | 74408434  | 189116825 | 114010542 | 125026357 | 18570202 |

|      |           |           |           |           |           |           |          |
|------|-----------|-----------|-----------|-----------|-----------|-----------|----------|
| 59,5 | 113088833 | 134687185 | 72006615  | 191847230 | 117898868 | 125905746 | 19440798 |
| 60,5 | 109471958 | 138229944 | 69971360  | 192992668 | 121751975 | 126483581 | 20083389 |
| 61,5 | 105839936 | 141588290 | 68285095  | 192718782 | 125524756 | 126791372 | 20529154 |
| 62,5 | 102253883 | 144751741 | 66931468  | 191249114 | 129177960 | 126872833 | 20818663 |
| 63,5 | 98768527  | 147711074 | 65895733  | 188840242 | 132679350 | 126778985 | 20995145 |
| 64,5 | 95431407  | 150458594 | 65164960  | 185758432 | 136004505 | 126563580 | 21098739 |
| 65,5 | 92282586  | 152988434 | 64728119  | 182260297 | 139137221 | 126279332 | 21162349 |
| 66,5 | 89354792  | 155296869 | 64576067  | 178578766 | 142069513 | 125975201 | 21209467 |
| 67,5 | 86673890  | 157382618 | 64701469  | 174914458 | 144801241 | 125694735 | 21253901 |
| 68,5 | 84259582  | 159247108 | 65098675  | 171431850 | 147339423 | 125475328 | 21301000 |
| 69,5 | 82126238  | 160894680 | 65763552  | 168259134 | 149697304 | 125348181 | 21349763 |
| 70,5 | 80283783  | 162332713 | 66693299  | 165490586 | 151893269 | 125338730 | 21395215 |
| 71,5 | 78738582  | 163571660 | 67886232  | 163190369 | 153949685 | 125467305 | 21430552 |
| 72,5 | 77494264  | 164624983 | 69341553  | 161396902 | 155891728 | 125749886 | 21448798 |
| 73,5 | 76552469  | 165508981 | 71059110  | 160127219 | 157746279 | 126198812 | 21443898 |
| 74,5 | 75913490  | 166242529 | 73039131  | 159380930 | 159540918 | 126823399 | 21411286 |
| 75,5 | 75576803  | 166846718 | 75281956  | 159143636 | 161303039 | 127630431 | 21348052 |
| 76,5 | 75541500  | 167344430 | 77787760  | 159389742 | 163059118 | 128624510 | 21252829 |
| 77,5 | 75806604  | 167759847 | 80556261  | 160084730 | 164834114 | 129808311 | 21125501 |
| 78,5 | 76371298  | 168117935 | 83586436  | 161186991 | 166651012 | 131182734 | 20966836 |
| 79,5 | 77235066  | 168443900 | 86876239  | 162649311 | 168530482 | 132747000 | 20778085 |
| 80,5 | 78397763  | 168762651 | 90422321  | 164420157 | 170490642 | 134498707 | 20560610 |
| 81,5 | 79859618  | 169098285 | 94219780  | 166444810 | 172546905 | 136433879 | 20315569 |
| 82,5 | 81621185  | 169473599 | 98261922  | 168666467 | 174711889 | 138547012 | 20043667 |
| 83,5 | 83683253  | 169909655 | 102540066 | 171027319 | 176995377 | 140831134 | 19745010 |
| 84,5 | 86046718  | 170425391 | 107043379 | 173469642 | 179404311 | 143277888 | 19419055 |
| 85,5 | 88712433  | 171037292 | 111758774 | 175936903 | 181942808 | 145877642 | 19064655 |
| 86,5 | 91681035  | 171759125 | 116670846 | 178374857 | 184612189 | 148619610 | 18680207 |
| 87,5 | 94952761  | 172601729 | 121761884 | 180732593 | 187411021 | 151491998 | 18263864 |
| 88,5 | 98527264  | 173572871 | 127011940 | 182963513 | 190335160 | 154482149 | 17813820 |
| 89,5 | 102403422 | 174677157 | 132398967 | 185026180 | 193377803 | 157576706 | 17328629 |
| 90,5 | 106579156 | 175916011 | 137899024 | 186885019 | 196529546 | 160761751 | 16807542 |

|       |           |           |           |           |           |           |          |
|-------|-----------|-----------|-----------|-----------|-----------|-----------|----------|
| 91,5  | 111051263 | 177287701 | 143486541 | 188510823 | 199778453 | 164022956 | 16250860 |
| 92,5  | 115815255 | 178787437 | 149134641 | 189881067 | 203110142 | 167345708 | 15660270 |
| 93,5  | 120865220 | 180407516 | 154815516 | 190980003 | 206507882 | 170715227 | 15039182 |
| 94,5  | 126193706 | 182137539 | 160500836 | 191798561 | 209952726 | 174116673 | 14393068 |
| 95,5  | 131791624 | 183964674 | 166162183 | 192334061 | 213423664 | 177535241 | 13729797 |
| 96,5  | 137648170 | 185873987 | 171771508 | 192589759 | 216897819 | 180956249 | 13059993 |
| 97,5  | 143750780 | 187848818 | 177301575 | 192574274 | 220350673 | 184365224 | 12397388 |
| 98,5  | 150085095 | 189871207 | 182726396 | 192300910 | 223756339 | 187747989 | 11759142 |
| 99,5  | 156634960 | 191922361 | 188021642 | 191786926 | 227087868 | 191090751 | 11165997 |
| 100,5 | 163382432 | 193983137 | 193165005 | 191052778 | 230317606 | 194380192 | 10642051 |
| 101,5 | 170307819 | 196034550 | 198136520 | 190121366 | 233417570 | 197603565 | 10213789 |
| 102,5 | 177389721 | 198058265 | 202918816 | 189017313 | 236359873 | 200748798 | 9908004  |
| 103,5 | 184605105 | 200037078 | 207497315 | 187766297 | 239117160 | 203804591 | 9748474  |
| 104,5 | 191929377 | 201955347 | 211860355 | 186394448 | 241663062 | 206760518 | 9751987  |
| 105,5 | 199336483 | 203799379 | 215999248 | 184927823 | 243972654 | 209607117 | 9925051  |
| 106,5 | 206799012 | 205557739 | 219908268 | 183391959 | 246022896 | 212335975 | 10262813 |
| 107,5 | 214288318 | 207221482 | 223584581 | 181811512 | 247793063 | 214939791 | 10750696 |
| 108,5 | 221774653 | 208784298 | 227028108 | 180209970 | 249265130 | 217412432 | 11367833 |
| 109,5 | 229227317 | 210242565 | 230241349 | 178609443 | 250424117 | 219748958 | 12090753 |
| 110,5 | 236614815 | 211595311 | 233229151 | 177030515 | 251258363 | 221945631 | 12896193 |
| 111,5 | 243905035 | 212844097 | 235998456 | 175492155 | 251759748 | 223999898 | 13762707 |
| 112,5 | 251065442 | 213992818 | 238558010 | 174011680 | 251923827 | 225910355 | 14671303 |
| 113,5 | 258063276 | 215047450 | 240918064 | 172604750 | 251749890 | 227676686 | 15605470 |
| 114,5 | 264865782 | 216015742 | 243090063 | 171285404 | 251240938 | 229299586 | 16550922 |
| 115,5 | 271440438 | 216906877 | 245086337 | 170066111 | 250403582 | 230780669 | 17495238 |
| 116,5 | 277755208 | 217731110 | 246919792 | 168957845 | 249247861 | 232122363 | 18427517 |
| 117,5 | 283778797 | 218499411 | 248603619 | 167970166 | 247787001 | 233327799 | 19338076 |
| 118,5 | 289480919 | 219223102 | 250151015 | 167111311 | 246037104 | 234400690 | 20218222 |
| 119,5 | 294832569 | 219913519 | 251574923 | 166388278 | 244016792 | 235345216 | 21060082 |
| 120,5 | 299806295 | 220581705 | 252887797 | 165806918 | 241746821 | 236165907 | 21856489 |
| 121,5 | 304376465 | 221238120 | 254101392 | 165372019 | 239249658 | 236867531 | 22600911 |
| 122,5 | 308519530 | 221892406 | 255226571 | 165087373 | 236549060 | 237454988 | 23287427 |

|       |           |           |           |           |           |           |          |
|-------|-----------|-----------|-----------|-----------|-----------|-----------|----------|
| 123,5 | 312214269 | 222553174 | 256273148 | 164955851 | 233669643 | 237933217 | 23910717 |
| 124,5 | 315442013 | 223227835 | 257249748 | 164979458 | 230636474 | 238307106 | 24466083 |
| 125,5 | 318186854 | 223922473 | 258163697 | 165159376 | 227474672 | 238581415 | 24949481 |
| 126,5 | 320435816 | 224641742 | 259020928 | 165496007 | 224209049 | 238760709 | 25357555 |
| 127,5 | 322178997 | 225388804 | 259825923 | 165988994 | 220863785 | 238849300 | 25687687 |
| 128,5 | 323409671 | 226165292 | 260581660 | 166637242 | 217462136 | 238851200 | 25938030 |
| 129,5 | 324124359 | 226971298 | 261289594 | 167438924 | 214026200 | 238770075 | 26107553 |
| 130,5 | 324322847 | 227805385 | 261949650 | 168391482 | 210576711 | 238609215 | 26196065 |
| 131,5 | 324008168 | 228664620 | 262560241 | 169491618 | 207132890 | 238371508 | 26204243 |
| 132,5 | 323186544 | 229544617 | 263118295 | 170735283 | 203712329 | 238059414 | 26133636 |
| 133,5 | 321867280 | 230439604 | 263619310 | 172117656 | 200330920 | 237674954 | 25986673 |
| 134,5 | 320062623 | 231342499 | 264057416 | 173633124 | 197002816 | 237219695 | 25766650 |
| 135,5 | 317787586 | 232244991 | 264425462 | 175275258 | 193740426 | 236694745 | 25477705 |
| 136,5 | 315059737 | 233137643 | 264715115 | 177036794 | 190554436 | 236100745 | 25124790 |
| 137,5 | 311898965 | 234009997 | 264916970 | 178909605 | 187453856 | 235437879 | 24713625 |
| 138,5 | 308327214 | 234850688 | 265020687 | 180884690 | 184446078 | 234705871 | 24250647 |
| 139,5 | 304368215 | 235647567 | 265015129 | 182952153 | 181536960 | 233904005 | 23742942 |
| 140,5 | 300047187 | 236387837 | 264888524 | 185101208 | 178730909 | 233031133 | 23198173 |
| 141,5 | 295390551 | 237058188 | 264628632 | 187320173 | 176030980 | 232085705 | 22624496 |
| 142,5 | 290425633 | 237644947 | 264222929 | 189596487 | 173438978 | 231065795 | 22030461 |
| 143,5 | 285180367 | 238134227 | 263658796 | 191916737 | 170955556 | 229969136 | 21424903 |
| 144,5 | 279683022 | 238512090 | 262923715 | 194266692 | 168580321 | 228793168 | 20816812 |
| 145,5 | 273961926 | 238764709 | 262005476 | 196631360 | 166311933 | 227535081 | 20215190 |
| 146,5 | 268045218 | 238878532 | 260892377 | 198995054 | 164148206 | 226191877 | 19628885 |
| 147,5 | 261960616 | 238840456 | 259573432 | 201341470 | 162086197 | 224760434 | 19066401 |
| 148,5 | 255735204 | 238637993 | 258038566 | 203653791 | 160122301 | 223237571 | 18535695 |
| 149,5 | 249395246 | 238259434 | 256278812 | 205914797 | 158252332 | 221620124 | 18043951 |
| 150,5 | 242966028 | 237694016 | 254286488 | 208106989 | 156471605 | 219905025 | 17597351 |
| 151,5 | 236471715 | 236932070 | 252055365 | 210212732 | 154775010 | 218089378 | 17200867 |
| 152,5 | 229935241 | 235965169 | 249580815 | 212214400 | 153157087 | 216170542 | 16858065 |
| 153,5 | 223378223 | 234786259 | 246859936 | 214094540 | 151612084 | 214146208 | 16570982 |
| 154,5 | 216820893 | 233389776 | 243891655 | 215836033 | 150134028 | 212014477 | 16340064 |

|       |           |           |           |           |           |           |          |
|-------|-----------|-----------|-----------|-----------|-----------|-----------|----------|
| 155,5 | 210282055 | 231771738 | 240676806 | 217422263 | 148716775 | 209773927 | 16164193 |
| 156,5 | 203779063 | 229929827 | 237218169 | 218837289 | 147354073 | 207423684 | 16040807 |
| 157,5 | 197327817 | 227863442 | 233520496 | 220066008 | 146039606 | 204963474 | 15966096 |
| 158,5 | 190942770 | 225573730 | 229590489 | 221094319 | 144767046 | 202393671 | 15935255 |
| 159,5 | 184636959 | 223063585 | 225436755 | 221909273 | 143530101 | 199715335 | 15942774 |
| 160,5 | 178422039 | 220337636 | 221069735 | 222499214 | 142322554 | 196930236 | 15982720 |
| 161,5 | 172308333 | 217402191 | 216501594 | 222853903 | 141138306 | 194040866 | 16049004 |
| 162,5 | 166304888 | 214265172 | 211746094 | 222964628 | 139971415 | 191050439 | 16135610 |
| 163,5 | 160419539 | 210936015 | 206818432 | 222824292 | 138816131 | 187962882 | 16236769 |
| 164,5 | 154658975 | 207425552 | 201735074 | 222427480 | 137666929 | 184782802 | 16347088 |
| 165,5 | 149028811 | 203745879 | 196513552 | 221770506 | 136518545 | 181515459 | 16461634 |
| 166,5 | 143533664 | 199910197 | 191172266 | 220851435 | 135365997 | 178166712 | 16575974 |
| 167,5 | 138177222 | 195932648 | 185730266 | 219670083 | 134204617 | 174742967 | 16686193 |
| 168,5 | 132962321 | 191828140 | 180207033 | 218227994 | 133030074 | 171251112 | 16788879 |
| 169,5 | 127891018 | 187612163 | 174622260 | 216528399 | 131838390 | 167698446 | 16881106 |
| 170,5 | 122964659 | 183300605 | 168995643 | 214576149 | 130625959 | 164092603 | 16960394 |
| 171,5 | 118183949 | 178909571 | 163346666 | 212377633 | 129389565 | 160441477 | 17024680 |
| 172,5 | 113549016 | 174455201 | 157694411 | 209940683 | 128126384 | 156753139 | 17072275 |
| 173,5 | 109059474 | 169953505 | 152057379 | 207274457 | 126833998 | 153035762 | 17101827 |
| 174,5 | 104714478 | 165420200 | 146453322 | 204389315 | 125510395 | 149297542 | 17112293 |
| 175,5 | 100512780 | 160870567 | 140899102 | 201296691 | 124153969 | 145546622 | 17102902 |
| 176,5 | 96452783  | 156319315 | 135410566 | 198008951 | 122763517 | 141791026 | 17073135 |
| 177,5 | 92532579  | 151780472 | 130002443 | 194539249 | 121338233 | 138038595 | 17022694 |
| 178,5 | 88750000  | 147267281 | 124688266 | 190901387 | 119877695 | 134296926 | 16951487 |
| 179,5 | 85102651  | 142792129 | 119480308 | 187109669 | 118381855 | 130573322 | 16859606 |
| 180,5 | 81587951  | 138366473 | 114389548 | 183178765 | 116851020 | 126874752 | 16747315 |
| 181,5 | 78203160  | 134000808 | 109425651 | 179123572 | 115285835 | 123207805 | 16615031 |
| 182,5 | 74945409  | 129704629 | 104596968 | 174959092 | 113687261 | 119578672 | 16463314 |
| 183,5 | 71811727  | 125486423 | 99910553  | 170700306 | 112056553 | 115993113 | 16292851 |
| 184,5 | 68799065  | 121353669 | 95372197  | 166362067 | 110395234 | 112456447 | 16104446 |
| 185,5 | 65904313  | 117312852 | 90986471  | 161958997 | 108705071 | 108973541 | 15899006 |
| 186,5 | 63124320  | 113369490 | 86756784  | 157505394 | 106988046 | 105548807 | 15677530 |

|       |          |           |          |           |           |           |          |
|-------|----------|-----------|----------|-----------|-----------|-----------|----------|
| 187,5 | 60455909 | 109528168 | 82685449 | 153015154 | 105246329 | 102186202 | 15441094 |
| 188,5 | 57895894 | 105792579 | 78773754 | 148501695 | 103482250 | 98889234  | 15190844 |
| 189,5 | 55441086 | 102165577 | 75022043 | 143977902 | 101698274 | 95660976  | 14927976 |
| 190,5 | 53088310 | 98649228  | 71429796 | 139456069 | 99896969  | 92504074  | 14653729 |
| 191,5 | 50834410 | 95244870  | 67995712 | 134947864 | 98080982  | 89420768  | 14369370 |
| 192,5 | 48676257 | 91953169  | 64717793 | 130464294 | 96253015  | 86412906  | 14076185 |
| 193,5 | 46610759 | 88774184  | 61593427 | 126015676 | 94415796  | 83481969  | 13775461 |
| 194,5 | 44634862 | 85707424  | 58619471 | 121611629 | 92572061  | 80629090  | 13468482 |
| 195,5 | 42745560 | 82751911  | 55792325 | 117261054 | 90724527  | 77855075  | 13156512 |
| 196,5 | 40939894 | 79906231  | 53108006 | 112972141 | 88875875  | 75160430  | 12840787 |
| 197,5 | 39214961 | 77168599  | 50562221 | 108752362 | 87028735  | 72545376  | 12522506 |
| 198,5 | 37567913 | 74536903  | 48150432 | 104608484 | 85185662  | 70009879  | 12202824 |
| 199,5 | 35995960 | 72008761  | 45867910 | 100546579 | 83349128  | 67553668  | 11882840 |
| 200,5 | 34496375 | 69581559  | 43709796 | 96572038  | 81521507  | 65176255  | 11563592 |
| 201,5 | 33066492 | 67252502  | 41671148 | 92689590  | 79705064  | 62876959  | 11246052 |
| 202,5 | 31703709 | 65018647  | 39746985 | 88903327  | 77901947  | 60654923  | 10931123 |
| 203,5 | 30405491 | 62876943  | 37932327 | 85216724  | 76114180  | 58509133  | 10619629 |
| 204,5 | 29169368 | 60824260  | 36222226 | 81632663  | 74343657  | 56438435  | 10312319 |
| 205,5 | 27992939 | 58857419  | 34611801 | 78153468  | 72592137  | 54441553  | 10009862 |
| 206,5 | 26873868 | 56973215  | 33096258 | 74780924  | 70861246  | 52517102  | 9712844  |
| 207,5 | 25809890 | 55168444  | 31670917 | 71516314  | 69152472  | 50663607  | 9421774  |
| 208,5 | 24798806 | 53439920  | 30331221 | 68360444  | 67467164  | 48879511  | 9137079  |
| 209,5 | 23838488 | 51784489  | 29072758 | 65313679  | 65806539  | 47163190  | 8859110  |
| 210,5 | 22926875 | 50199048  | 27891268 | 62375966  | 64171680  | 45512967  | 8588142  |
| 211,5 | 22061975 | 48680554  | 26782652 | 59546873  | 62563541  | 43927119  | 8324378  |
| 212,5 | 21241865 | 47226036  | 25742978 | 56825612  | 60982951  | 42403889  | 8067955  |
| 213,5 | 20464690 | 45832601  | 24768482 | 54211075  | 59430618  | 40941493  | 7818946  |
| 214,5 | 19728664 | 44497440  | 23855573 | 51701861  | 57907135  | 39538135  | 7577364  |
| 215,5 | 19032065 | 43217837  | 23000832 | 49296304  | 56412985  | 38192005  | 7343172  |
| 216,5 | 18373241 | 41991169  | 22201009 | 46992505  | 54948546  | 36901294  | 7116283  |
| 217,5 | 17750607 | 40814907  | 21453022 | 44788354  | 53514103  | 35664199  | 6896569  |
| 218,5 | 17162640 | 39686624  | 20753955 | 42681562  | 52109844  | 34478925  | 6683866  |

|       |          |          |          |          |          |          |         |
|-------|----------|----------|----------|----------|----------|----------|---------|
| 219,5 | 16607885 | 38603989 | 20101048 | 40669680 | 50735877 | 33343696 | 6477977 |
| 220,5 | 16084951 | 37564770 | 19491699 | 38750132 | 49392230 | 32256756 | 6278684 |
| 221,5 | 15592507 | 36566833 | 18923454 | 36920228 | 48078858 | 31216376 | 6085745 |
| 222,5 | 15129289 | 35608140 | 18394002 | 35177192 | 46795653 | 30220855 | 5898906 |
| 223,5 | 14694090 | 34686748 | 17901170 | 33518181 | 45542445 | 29268527 | 5717902 |
| 224,5 | 14285766 | 33800808 | 17442916 | 31940304 | 44319012 | 28357761 | 5542462 |
| 225,5 | 13903232 | 32948558 | 17017324 | 30440638 | 43125082 | 27486967 | 5372314 |
| 226,5 | 13545459 | 32128328 | 16622594 | 29016248 | 41960344 | 26654595 | 5207185 |
| 227,5 | 13211478 | 31338530 | 16257039 | 27664196 | 40824447 | 25859138 | 5046811 |
| 228,5 | 12900373 | 30577658 | 15919079 | 26381561 | 39717007 | 25099136 | 4890931 |
| 229,5 | 12611286 | 29844286 | 15607232 | 25165447 | 38637613 | 24373173 | 4739297 |
| 230,5 | 12343409 | 29137066 | 15320109 | 24012996 | 37585833 | 23679883 | 4591670 |
| 231,5 | 12095990 | 28454718 | 15056410 | 22921396 | 36561210 | 23017945 | 4447825 |
| 232,5 | 11868326 | 27796036 | 14814917 | 21887889 | 35563276 | 22386089 | 4307551 |
| 233,5 | 11659764 | 27159879 | 14594486 | 20909782 | 34591546 | 21783091 | 4170652 |
| 234,5 | 11469700 | 26545170 | 14394047 | 19984448 | 33645529 | 21207779 | 4036948 |
| 235,5 | 11297580 | 25950892 | 14212594 | 19109337 | 32724726 | 20659026 | 3906275 |
| 236,5 | 11142894 | 25376088 | 14049182 | 18281973 | 31828633 | 20135754 | 3778485 |
| 237,5 | 11005179 | 24819853 | 13902923 | 17499964 | 30956743 | 19636932 | 3653447 |
| 238,5 | 10884014 | 24281337 | 13772980 | 16761001 | 30108552 | 19161577 | 3531048 |
| 239,5 | 10779025 | 23759735 | 13658564 | 16062860 | 29283554 | 18708748 | 3411192 |
| 240,5 | 10689877 | 23254294 | 13558930 | 15403402 | 28481250 | 18277551 | 3293800 |
| 241,5 | 10616276 | 22764303 | 13473370 | 14780576 | 27701142 | 17867133 | 3178812 |
| 242,5 | 10557970 | 22289091 | 13401214 | 14192419 | 26942739 | 17476687 | 3066186 |
| 243,5 | 10514744 | 21828029 | 13341823 | 13637051 | 26205556 | 17105441 | 2955899 |
| 244,5 | 10486421 | 21380525 | 13294586 | 13112678 | 25489117 | 16752665 | 2847949 |
| 245,5 | 10472859 | 20946020 | 13258920 | 12617589 | 24792950 | 16417668 | 2742356 |
| 246,5 | 10473953 | 20523991 | 13234262 | 12150156 | 24116596 | 16099791 | 2639163 |
| 247,5 | 10489630 | 20113943 | 13220069 | 11708827 | 23459601 | 15798414 | 2538438 |
| 248,5 | 10519852 | 19715413 | 13215817 | 11292131 | 22821520 | 15512946 | 2440277 |
| 249,5 | 10564607 | 19327963 | 13220993 | 10898670 | 22201919 | 15242831 | 2344809 |
| 250,5 | 10623917 | 18951182 | 13235100 | 10527119 | 21600372 | 14987538 | 2252195 |



|       |          |          |          |          |          |          |         |
|-------|----------|----------|----------|----------|----------|----------|---------|
| 251,5 | 10697829 | 18584683 | 13257648 | 10176221 | 21016461 | 14746568 | 2162636 |
| 252,5 | 10786417 | 18228100 | 13288156 | 9844787  | 20449777 | 14519448 | 2076378 |
| 253,5 | 10889779 | 17881090 | 13326150 | 9531694  | 19899921 | 14305727 | 1993714 |
| 254,5 | 11008032 | 17543328 | 13371158 | 9235876  | 19366501 | 14104979 | 1914988 |
| 255,5 | 11141316 | 17214508 | 13422713 | 8956331  | 18849134 | 13916800 | 1840604 |
| 256,5 | 11289784 | 16894342 | 13480348 | 8692108  | 18347444 | 13740805 | 1771025 |
| 257,5 | 11453606 | 16582556 | 13543598 | 8442312  | 17861063 | 13576627 | 1706773 |
| 258,5 | 11632960 | 16278893 | 13611995 | 8206097  | 17389631 | 13423915 | 1648428 |
| 259,5 | 11828032 | 15983107 | 13685071 | 7982667  | 16932793 | 13282334 | 1596617 |
| 260,5 | 12039011 | 15694967 | 13762355 | 7771269  | 16490204 | 13151561 | 1551996 |
| 261,5 | 12266086 | 15414254 | 13843374 | 7571194  | 16061521 | 13031286 | 1515231 |
| 262,5 | 12509440 | 15140759 | 13927651 | 7381775  | 15646411 | 12921207 | 1486959 |
| 263,5 | 12769245 | 14874283 | 14014705 | 7202382  | 15244545 | 12821032 | 1467754 |
| 264,5 | 13045657 | 14614637 | 14104055 | 7032421  | 14855599 | 12730474 | 1458083 |
| 265,5 | 13338813 | 14361642 | 14195212 | 6871333  | 14479255 | 12649251 | 1458270 |
| 266,5 | 13648820 | 14115124 | 14287688 | 6718591  | 14115200 | 12577085 | 1468470 |
| 267,5 | 13975752 | 13874921 | 14380992 | 6573699  | 13763125 | 12513698 | 1488657 |
| 268,5 | 14319642 | 13640875 | 14474629 | 6436189  | 13422727 | 12458812 | 1518628 |
| 269,5 | 14680474 | 13412834 | 14568106 | 6305621  | 13093705 | 12412148 | 1558028 |
| 270,5 | 15058177 | 13190653 | 14660929 | 6181579  | 12775763 | 12373420 | 1606382 |
| 271,5 | 15452616 | 12974195 | 14752604 | 6063671  | 12468611 | 12342339 | 1663130 |
| 272,5 | 15863584 | 12763323 | 14842640 | 5951530  | 12171960 | 12318608 | 1727665 |
| 273,5 | 16290794 | 12557910 | 14930551 | 5844807  | 11885527 | 12301918 | 1799362 |
| 274,5 | 16733870 | 12357830 | 15015854 | 5743175  | 11609031 | 12291952 | 1877598 |
| 275,5 | 17192340 | 12162963 | 15098072 | 5646325  | 11342194 | 12288379 | 1961773 |
| 276,5 | 17665627 | 11973192 | 15176738 | 5553966  | 11084743 | 12290853 | 2051314 |
| 277,5 | 18153041 | 11788403 | 15251392 | 5465825  | 10836408 | 12299014 | 2145677 |
| 278,5 | 18653773 | 11608488 | 15321588 | 5381641  | 10596923 | 12312483 | 2244348 |
| 279,5 | 19166886 | 11433339 | 15386890 | 5301173  | 10366021 | 12330862 | 2346841 |
| 280,5 | 19691311 | 11262853 | 15446878 | 5224190  | 10143444 | 12353735 | 2452686 |
| 281,5 | 20225841 | 11096929 | 15501147 | 5150475  | 9928934  | 12380665 | 2561433 |
| 282,5 | 20769127 | 10935469 | 15549310 | 5079826  | 9722235  | 12411193 | 2672639 |

|       |          |          |          |         |         |          |         |
|-------|----------|----------|----------|---------|---------|----------|---------|
| 283,5 | 21319675 | 10778378 | 15591000 | 5012049 | 9523096 | 12444840 | 2785867 |
| 284,5 | 21875846 | 10625562 | 15625869 | 4946966 | 9331269 | 12481102 | 2900676 |
| 285,5 | 22435856 | 10476931 | 15653593 | 4884404 | 9146507 | 12519458 | 3016625 |
| 286,5 | 22997779 | 10332395 | 15673870 | 4824204 | 8968567 | 12559363 | 3133262 |
| 287,5 | 23559548 | 10191869 | 15686423 | 4766216 | 8797209 | 12600253 | 3250124 |
| 288,5 | 24118965 | 10055268 | 15691002 | 4710298 | 8632195 | 12641546 | 3366740 |
| 289,5 | 24673711 | 9922508  | 15687383 | 4656317 | 8473291 | 12682642 | 3482622 |
| 290,5 | 25221350 | 9793511  | 15675370 | 4604149 | 8320263 | 12722929 | 3597270 |
| 291,5 | 25759351 | 9668196  | 15654795 | 4553675 | 8172883 | 12761780 | 3710173 |
| 292,5 | 26285096 | 9546486  | 15625521 | 4504788 | 8030922 | 12798563 | 3820807 |
| 293,5 | 26795903 | 9428306  | 15587438 | 4457383 | 7894156 | 12832637 | 3928643 |
| 294,5 | 27289041 | 9313583  | 15540469 | 4411366 | 7762362 | 12863364 | 4033141 |
| 295,5 | 27761758 | 9202245  | 15484565 | 4366645 | 7635319 | 12890106 | 4133762 |
| 296,5 | 28211299 | 9094220  | 15419708 | 4323139 | 7512809 | 12912235 | 4229967 |
| 297,5 | 28634932 | 8989441  | 15345910 | 4280768 | 7394616 | 12929134 | 4321222 |
| 298,5 | 29029978 | 8887840  | 15263213 | 4239461 | 7280526 | 12940204 | 4407004 |
| 299,5 | 29393833 | 8789351  | 15171689 | 4199150 | 7170328 | 12944870 | 4486805 |
| 300,5 | 29723998 | 8693911  | 15071437 | 4159772 | 7063810 | 12942586 | 4560136 |
| 301,5 | 30018108 | 8601456  | 14962585 | 4121271 | 6960765 | 12932837 | 4626535 |
| 302,5 | 30273954 | 8511925  | 14845289 | 4083593 | 6860987 | 12915150 | 4685569 |
| 303,5 | 30489515 | 8425259  | 14719729 | 4046689 | 6764272 | 12889093 | 4736842 |
| 304,5 | 30662977 | 8341398  | 14586114 | 4010515 | 6670417 | 12854284 | 4779997 |
| 305,5 | 30792762 | 8260286  | 14444672 | 3975028 | 6579222 | 12810394 | 4814723 |
| 306,5 | 30877541 | 8181867  | 14295659 | 3940192 | 6490489 | 12757150 | 4840757 |
| 307,5 | 30916260 | 8106087  | 14139347 | 3905973 | 6404021 | 12694338 | 4857890 |
| 308,5 | 30908148 | 8032892  | 13976031 | 3872339 | 6319626 | 12621807 | 4865969 |
| 309,5 | 30852733 | 7962230  | 13806024 | 3839263 | 6237111 | 12539472 | 4864896 |
| 310,5 | 30749846 | 7894050  | 13629655 | 3806719 | 6156287 | 12447312 | 4854636 |
| 311,5 | 30599630 | 7828304  | 13447268 | 3774686 | 6076968 | 12345371 | 4835212 |
| 312,5 | 30402534 | 7764941  | 13259221 | 3743144 | 5998970 | 12233762 | 4806711 |
| 313,5 | 30159316 | 7703915  | 13065883 | 3712075 | 5922114 | 12112661 | 4769277 |
| 314,5 | 29871029 | 7645179  | 12867634 | 3681464 | 5846222 | 11982306 | 4723116 |

|       |          |         |          |         |         |          |         |
|-------|----------|---------|----------|---------|---------|----------|---------|
| 315,5 | 29539015 | 7588687 | 12664860 | 3651298 | 5771120 | 11842996 | 4668486 |
| 316,5 | 29164885 | 7534395 | 12457956 | 3621566 | 5696641 | 11695089 | 4605704 |
| 317,5 | 28750505 | 7482259 | 12247320 | 3592258 | 5622619 | 11538992 | 4535135 |
| 318,5 | 28297973 | 7432236 | 12033355 | 3563367 | 5548894 | 11375165 | 4457191 |
| 319,5 | 27809596 | 7384283 | 11816464 | 3534886 | 5475313 | 11204109 | 4372324 |
| 320,5 | 27287864 | 7338359 | 11597050 | 3506811 | 5401726 | 11026362 | 4281026 |
| 321,5 | 26735421 | 7294423 | 11375515 | 3479138 | 5327991 | 10842498 | 4183819 |
| 322,5 | 26155039 | 7252433 | 11152257 | 3451865 | 5253972 | 10653113 | 4081251 |
| 323,5 | 25549586 | 7212351 | 10927671 | 3424991 | 5179541 | 10458828 | 3973891 |
| 324,5 | 24922002 | 7174135 | 10702144 | 3398516 | 5104578 | 10260275 | 3862322 |
| 325,5 | 24275261 | 7137746 | 10476056 | 3372440 | 5028969 | 10058094 | 3747139 |
| 326,5 | 23612349 | 7103145 | 10249780 | 3346765 | 4952611 | 9852930  | 3628937 |
| 327,5 | 22936238 | 7070293 | 10023678 | 3321494 | 4875411 | 9645423  | 3508313 |
| 328,5 | 22249853 | 7039149 | 9798102  | 3296630 | 4797284 | 9436203  | 3385856 |
| 329,5 | 21556053 | 7009675 | 9573391  | 3272176 | 4718155 | 9225890  | 3262144 |
| 330,5 | 20857611 | 6981831 | 9349874  | 3248136 | 4637963 | 9015083  | 3137742 |
| 331,5 | 20157189 | 6955576 | 9127864  | 3224516 | 4556655 | 8804360  | 3013196 |
| 332,5 | 19457324 | 6930870 | 8907662  | 3201321 | 4474190 | 8594274  | 2889031 |
| 333,5 | 18760412 | 6907673 | 8689553  | 3178555 | 4390541 | 8385347  | 2765748 |
| 334,5 | 18068699 | 6885941 | 8473808  | 3156226 | 4305691 | 8178073  | 2643821 |
| 335,5 | 17384267 | 6865633 | 8260680  | 3134339 | 4219637 | 7972911  | 2523701 |
| 336,5 | 16709030 | 6846706 | 8050411  | 3112901 | 4132387 | 7770287  | 2405807 |
| 337,5 | 16044728 | 6829114 | 7843222  | 3091919 | 4043961 | 7570589  | 2290532 |
| 338,5 | 15392928 | 6812812 | 7639320  | 3071399 | 3954395 | 7374171  | 2178240 |
| 339,5 | 14755019 | 6797754 | 7438897  | 3051349 | 3863733 | 7181350  | 2069268 |
| 340,5 | 14132217 | 6783890 | 7242127  | 3031776 | 3772033 | 6992409  | 1963926 |
| 341,5 | 13525569 | 6771171 | 7049169  | 3012688 | 3679367 | 6807593  | 1862498 |
| 342,5 | 12935957 | 6759546 | 6860165  | 2994091 | 3585814 | 6627115  | 1765244 |
| 343,5 | 12364105 | 6748960 | 6675243  | 2975995 | 3491466 | 6451154  | 1672399 |
| 344,5 | 11810585 | 6739359 | 6494514  | 2958406 | 3396427 | 6279858  | 1584178 |
| 345,5 | 11275828 | 6730684 | 6318076  | 2941332 | 3300807 | 6113346  | 1500771 |
| 346,5 | 10760133 | 6722877 | 6146012  | 2924782 | 3204727 | 5951706  | 1422350 |

|       |          |         |         |         |         |         |         |
|-------|----------|---------|---------|---------|---------|---------|---------|
| 347,5 | 10263676 | 6715874 | 5978390 | 2908764 | 3108316 | 5795004 | 1349061 |
| 348,5 | 9786517  | 6709613 | 5815265 | 2893285 | 3011709 | 5643278 | 1281029 |
| 349,5 | 9328616  | 6704024 | 5656682 | 2878354 | 2915047 | 5496545 | 1218349 |
| 350,5 | 8889841  | 6699038 | 5502669 | 2863980 | 2818476 | 5354801 | 1161087 |
| 351,5 | 8469973  | 6694583 | 5353245 | 2850170 | 2722146 | 5218023 | 1109275 |
| 352,5 | 8068724  | 6690582 | 5208420 | 2836933 | 2626210 | 5086174 | 1062901 |
| 353,5 | 7685740  | 6686957 | 5068191 | 2824278 | 2530821 | 4959198 | 1021909 |
| 354,5 | 7320613  | 6683626 | 4932545 | 2812214 | 2436134 | 4837027 | 986190  |
| 355,5 | 6972890  | 6680503 | 4801463 | 2800749 | 2342303 | 4719582 | 955581  |
| 356,5 | 6642078  | 6677500 | 4674915 | 2789893 | 2249479 | 4606773 | 929863  |
| 357,5 | 6327654  | 6674524 | 4552866 | 2779654 | 2157809 | 4498502 | 908766  |
| 358,5 | 6029071  | 6671482 | 4435272 | 2770042 | 2067439 | 4394661 | 891970  |
| 359,5 | 5745764  | 6668272 | 4322084 | 2761066 | 1978507 | 4295139 | 879118  |
| 360,5 | 5477156  | 6664795 | 4213248 | 2752736 | 1891147 | 4199816 | 869825  |
| 361,5 | 5222663  | 6660943 | 4108703 | 2745060 | 1805483 | 4108571 | 863689  |
| 362,5 | 4981699  | 6656609 | 4008386 | 2738051 | 1721634 | 4021276 | 860307  |
| 363,5 | 4753677  | 6651680 | 3912231 | 2731716 | 1639710 | 3937803 | 859282  |
| 364,5 | 4538019  | 6646040 | 3820165 | 2726067 | 1559811 | 3858020 | 860232  |
| 365,5 | 4334151  | 6639571 | 3732117 | 2721115 | 1482027 | 3781796 | 862798  |
| 366,5 | 4141513  | 6632152 | 3648012 | 2716869 | 1406439 | 3708997 | 866652  |
| 367,5 | 3959553  | 6623659 | 3567772 | 2713341 | 1333117 | 3639488 | 871492  |
| 368,5 | 3787738  | 6613965 | 3491320 | 2710542 | 1262122 | 3573138 | 877047  |
| 369,5 | 3625549  | 6602942 | 3418579 | 2708484 | 1193503 | 3509811 | 883079  |
| 370,5 | 3472482  | 6590459 | 3349469 | 2707178 | 1127297 | 3449377 | 889377  |
| 371,5 | 3328052  | 6576384 | 3283913 | 2706636 | 1063533 | 3391704 | 895755  |
| 372,5 | 3191793  | 6560584 | 3221832 | 2706871 | 1002230 | 3336662 | 902055  |
| 373,5 | 3063257  | 6542925 | 3163149 | 2707894 | 943394  | 3284124 | 908137  |
| 374,5 | 2942014  | 6523272 | 3107789 | 2709720 | 887024  | 3233964 | 913883  |
| 375,5 | 2827653  | 6501492 | 3055676 | 2712360 | 833109  | 3186058 | 919193  |
| 376,5 | 2719782  | 6477451 | 3006738 | 2715828 | 781630  | 3140286 | 923979  |
| 377,5 | 2618026  | 6451018 | 2960902 | 2720139 | 732557  | 3096528 | 928170  |
| 378,5 | 2522029  | 6422063 | 2918099 | 2725306 | 685856  | 3054671 | 931704  |

|       |         |         |         |         |        |         |        |
|-------|---------|---------|---------|---------|--------|---------|--------|
| 379,5 | 2431452 | 6390460 | 2878260 | 2731342 | 641485 | 3014600 | 934532 |
| 380,5 | 2345973 | 6356084 | 2841321 | 2738264 | 599394 | 2976207 | 936611 |
| 381,5 | 2265285 | 6318816 | 2807216 | 2746085 | 559530 | 2939387 | 937910 |
| 382,5 | 2189099 | 6278544 | 2775886 | 2754821 | 521832 | 2904036 | 938403 |
| 383,5 | 2117140 | 6235157 | 2747270 | 2764486 | 486237 | 2870058 | 938073 |
| 384,5 | 2049146 | 6188555 | 2721311 | 2775097 | 452678 | 2837358 | 936906 |
| 385,5 | 1984870 | 6138644 | 2697954 | 2786670 | 421084 | 2805845 | 934897 |
| 386,5 | 1924079 | 6085338 | 2677147 | 2799220 | 391383 | 2775433 | 932046 |
| 387,5 | 1866550 | 6028560 | 2658838 | 2812763 | 363499 | 2746042 | 928359 |
| 388,5 | 1812074 | 5968245 | 2642979 | 2827316 | 337358 | 2717594 | 923846 |
| 389,5 | 1760451 | 5904338 | 2629522 | 2842895 | 312881 | 2690017 | 918525 |
| 390,5 | 1711492 | 5836794 | 2618423 | 2859517 | 289994 | 2663244 | 912417 |
| 391,5 | 1665020 | 5765584 | 2609637 | 2877198 | 268618 | 2637211 | 905551 |
| 392,5 | 1620864 | 5690689 | 2603122 | 2895956 | 248679 | 2611862 | 897961 |
| 393,5 | 1578863 | 5612108 | 2598836 | 2915805 | 230100 | 2587143 | 889687 |
| 394,5 | 1538866 | 5529852 | 2596739 | 2936764 | 212810 | 2563006 | 880775 |
| 395,5 | 1500726 | 5443948 | 2596791 | 2958848 | 196735 | 2539410 | 871279 |
| 396,5 | 1464307 | 5354440 | 2598953 | 2982073 | 181806 | 2516316 | 861260 |
| 397,5 | 1429477 | 5261385 | 2603184 | 3006455 | 167954 | 2493691 | 850784 |
| 398,5 | 1396111 | 5164862 | 2609445 | 3032009 | 155115 | 2471509 | 839926 |
| 399,5 | 1364092 | 5064963 | 2617696 | 3058751 | 143225 | 2449745 | 828768 |
| 400,5 | 1333306 | 4961798 | 2627894 | 3086694 | 132223 | 2428383 | 817402 |
| 401,5 | 1303646 | 4855494 | 2639999 | 3115852 | 122052 | 2407408 | 805924 |
| 402,5 | 1275009 | 4746196 | 2653963 | 3146238 | 112655 | 2386812 | 794440 |
| 403,5 | 1247298 | 4634062 | 2669742 | 3177863 | 103980 | 2366589 | 783062 |
| 404,5 | 1220421 | 4519271 | 2687285 | 3210740 | 95977  | 2346739 | 771910 |
| 405,5 | 1194289 | 4402014 | 2706540 | 3244877 | 88599  | 2327264 | 761108 |
| 406,5 | 1168817 | 4282498 | 2727451 | 3280282 | 81800  | 2308170 | 750787 |
| 407,5 | 1143928 | 4160944 | 2749956 | 3316964 | 75539  | 2289466 | 741079 |
| 408,5 | 1119545 | 4037586 | 2773993 | 3354926 | 69776  | 2271165 | 732119 |
| 409,5 | 1095597 | 3912669 | 2799489 | 3394173 | 64474  | 2253281 | 724039 |
| 410,5 | 1072017 | 3786450 | 2826371 | 3434706 | 59597  | 2235828 | 716970 |

|       |         |         |         |         |       |         |         |
|-------|---------|---------|---------|---------|-------|---------|---------|
| 411,5 | 1048743 | 3659193 | 2854557 | 3476523 | 55114 | 2218826 | 711033  |
| 412,5 | 1025715 | 3531173 | 2883958 | 3519622 | 50994 | 2202292 | 706342  |
| 413,5 | 1002878 | 3402667 | 2914479 | 3563997 | 47208 | 2186246 | 702995  |
| 414,5 | 980183  | 3273959 | 2946019 | 3609638 | 43730 | 2170706 | 701077  |
| 415,5 | 957583  | 3145336 | 2978466 | 3656534 | 40536 | 2155691 | 700651  |
| 416,5 | 935036  | 3017083 | 3011703 | 3704669 | 37603 | 2141219 | 701760  |
| 417,5 | 912506  | 2889487 | 3045601 | 3754024 | 34909 | 2127306 | 704424  |
| 418,5 | 889959  | 2762831 | 3080026 | 3804577 | 32437 | 2113966 | 708640  |
| 419,5 | 867368  | 2637393 | 3114833 | 3856300 | 30167 | 2101212 | 714383  |
| 420,5 | 844709  | 2513444 | 3149867 | 3909162 | 28083 | 2089053 | 721603  |
| 421,5 | 821964  | 2391247 | 3184966 | 3963125 | 26169 | 2077494 | 730234  |
| 422,5 | 799119  | 2271057 | 3219956 | 4018150 | 24413 | 2066539 | 740190  |
| 423,5 | 776165  | 2153114 | 3254659 | 4074188 | 22800 | 2056185 | 751371  |
| 424,5 | 753098  | 2037647 | 3288882 | 4131188 | 21319 | 2046427 | 763668  |
| 425,5 | 729919  | 1924869 | 3322429 | 4189091 | 19959 | 2037254 | 776959  |
| 426,5 | 706635  | 1814980 | 3355093 | 4247834 | 18710 | 2028650 | 791122  |
| 427,5 | 683254  | 1708159 | 3386662 | 4307344 | 17563 | 2020596 | 806027  |
| 428,5 | 659794  | 1604570 | 3416916 | 4367545 | 16509 | 2013067 | 821548  |
| 429,5 | 636273  | 1504357 | 3445631 | 4428352 | 15541 | 2006031 | 837558  |
| 430,5 | 612714  | 1407646 | 3472578 | 4489674 | 14652 | 1999453 | 853932  |
| 431,5 | 589148  | 1314543 | 3497525 | 4551410 | 13835 | 1993292 | 870553  |
| 432,5 | 565603  | 1225132 | 3520238 | 4613455 | 13084 | 1987503 | 887306  |
| 433,5 | 542117  | 1139481 | 3540485 | 4675694 | 12394 | 1982034 | 904083  |
| 434,5 | 518727  | 1057636 | 3558033 | 4738005 | 11760 | 1976832 | 920781  |
| 435,5 | 495474  | 979623  | 3572653 | 4800257 | 11178 | 1971837 | 937307  |
| 436,5 | 472400  | 905450  | 3584121 | 4862313 | 10643 | 1966986 | 953571  |
| 437,5 | 449551  | 835108  | 3592223 | 4924027 | 10152 | 1962212 | 969493  |
| 438,5 | 426972  | 768568  | 3596751 | 4985243 | 9702  | 1957447 | 984997  |
| 439,5 | 404710  | 705787  | 3597509 | 5045801 | 9288  | 1952619 | 1000015 |
| 440,5 | 382812  | 646706  | 3594314 | 5105531 | 8909  | 1947654 | 1014485 |
| 441,5 | 361323  | 591250  | 3587002 | 5164255 | 8562  | 1942478 | 1028353 |
| 442,5 | 340289  | 539333  | 3575422 | 5221790 | 8245  | 1937016 | 1041569 |

|       |        |        |         |         |      |         |         |
|-------|--------|--------|---------|---------|------|---------|---------|
| 443,5 | 319754 | 490857 | 3559445 | 5277946 | 7955 | 1931191 | 1054090 |
| 444,5 | 299760 | 445714 | 3538965 | 5332524 | 7690 | 1924930 | 1065877 |
| 445,5 | 280346 | 403785 | 3513896 | 5385322 | 7449 | 1918160 | 1076898 |
| 446,5 | 261549 | 364946 | 3484180 | 5436132 | 7231 | 1910808 | 1087124 |
| 447,5 | 243401 | 329066 | 3449784 | 5484741 | 7033 | 1902805 | 1096532 |
| 448,5 | 225934 | 296009 | 3410703 | 5530934 | 6855 | 1894087 | 1105102 |
| 449,5 | 209171 | 265635 | 3366960 | 5574489 | 6696 | 1884590 | 1112819 |
| 450,5 | 193134 | 237802 | 3318610 | 5615188 | 6554 | 1874257 | 1119669 |
| 451,5 | 177841 | 212367 | 3265733 | 5652807 | 6428 | 1863035 | 1125644 |
| 452,5 | 163304 | 189188 | 3208443 | 5687124 | 6318 | 1850875 | 1130736 |
| 453,5 | 149529 | 168122 | 3146882 | 5717920 | 6223 | 1837735 | 1134940 |
| 454,5 | 136522 | 149031 | 3081219 | 5744975 | 6143 | 1823578 | 1138252 |
| 455,5 | 124280 | 131777 | 3011653 | 5768075 | 6076 | 1808372 | 1140670 |
| 456,5 | 112797 | 116227 | 2938410 | 5787013 | 6023 | 1792094 | 1142192 |
| 457,5 | 102064 | 102252 | 2861737 | 5801584 | 5983 | 1774724 | 1142817 |
| 458,5 | 92068  | 89728  | 2781910 | 5811595 | 5956 | 1756251 | 1142544 |
| 459,5 | 82790  | 78536  | 2699219 | 5816861 | 5941 | 1736669 | 1141372 |
| 460,5 | 74210  | 68562  | 2613978 | 5817208 | 5939 | 1715979 | 1139300 |
| 461,5 | 66305  | 59699  | 2526512 | 5812474 | 5949 | 1694188 | 1136326 |
| 462,5 | 59048  | 51847  | 2437162 | 5802514 | 5971 | 1671308 | 1132448 |
| 463,5 | 52411  | 44909  | 2346276 | 5787194 | 6006 | 1647359 | 1127663 |
| 464,5 | 46363  | 38797  | 2254209 | 5766399 | 6053 | 1622364 | 1121967 |
| 465,5 | 40874  | 33428  | 2161319 | 5740034 | 6112 | 1596353 | 1115356 |
| 466,5 | 35911  | 28726  | 2067964 | 5708020 | 6185 | 1569361 | 1107828 |
| 467,5 | 31440  | 24619  | 1974498 | 5670302 | 6270 | 1541426 | 1099378 |
| 468,5 | 27429  | 21042  | 1881270 | 5626843 | 6370 | 1512591 | 1090003 |
| 469,5 | 23844  | 17937  | 1788617 | 5577634 | 6483 | 1482903 | 1079701 |
| 470,5 | 20654  | 15248  | 1696864 | 5522684 | 6610 | 1452412 | 1068471 |
| 471,5 | 17825  | 12928  | 1606323 | 5462031 | 6753 | 1421172 | 1056313 |
| 472,5 | 15327  | 10930  | 1517287 | 5395734 | 6911 | 1389238 | 1043231 |
| 473,5 | 13130  | 9216   | 1430028 | 5323880 | 7085 | 1356668 | 1029229 |
| 474,5 | 11207  | 7750   | 1344800 | 5246580 | 7277 | 1323522 | 1014317 |

|       |      |      |         |         |       |         |        |
|-------|------|------|---------|---------|-------|---------|--------|
| 475,5 | 9528 | 6498 | 1261831 | 5163969 | 7487  | 1289863 | 998505 |
| 476,5 | 8071 | 5434 | 1181327 | 5076210 | 7716  | 1255752 | 981811 |
| 477,5 | 6810 | 4532 | 1103468 | 4983489 | 7964  | 1221253 | 964252 |
| 478,5 | 5724 | 3768 | 1028410 | 4886014 | 8235  | 1186430 | 945854 |
| 479,5 | 4792 | 3125 | 956281  | 4784020 | 8527  | 1151349 | 926644 |
| 480,5 | 3996 | 2584 | 887185  | 4677759 | 8844  | 1116074 | 906657 |
| 481,5 | 3320 | 2131 | 821203  | 4567508 | 9186  | 1080670 | 885928 |
| 482,5 | 2747 | 1753 | 758388  | 4453561 | 9556  | 1045201 | 864501 |
| 483,5 | 2263 | 1437 | 698772  | 4336229 | 9954  | 1009731 | 842422 |
| 484,5 | 1857 | 1175 | 642364  | 4215839 | 10383 | 974324  | 819741 |
| 485,5 | 1518 | 958  | 589153  | 4092733 | 10845 | 939041  | 796514 |
| 486,5 | 1236 | 779  | 539108  | 3967263 | 11342 | 903945  | 772799 |
| 487,5 | 1002 | 632  | 492179  | 3839790 | 11876 | 869096  | 748657 |
| 488,5 | 809  | 511  | 448303  | 3710684 | 12451 | 834551  | 724152 |
| 489,5 | 650  | 412  | 407402  | 3580316 | 13068 | 800370  | 699352 |
| 490,5 | 521  | 331  | 369383  | 3449063 | 13732 | 766606  | 674324 |
| 491,5 | 415  | 265  | 334145  | 3317300 | 14444 | 733314  | 649138 |
| 492,5 | 330  | 212  | 301579  | 3185398 | 15209 | 700546  | 623864 |
| 493,5 | 261  | 169  | 271567  | 3053725 | 16030 | 668350  | 598572 |
| 494,5 | 205  | 134  | 243986  | 2922640 | 16911 | 636775  | 573333 |
| 495,5 | 161  | 107  | 218710  | 2792492 | 17856 | 605865  | 548215 |
| 496,5 | 126  | 84   | 195610  | 2663621 | 18870 | 575662  | 523286 |
| 497,5 | 98   | 66   | 174557  | 2536349 | 19958 | 546206  | 498610 |
| 498,5 | 76   | 52   | 155422  | 2410985 | 21125 | 517532  | 474250 |
| 499,5 | 58   | 41   | 138076  | 2287819 | 22375 | 489674  | 450265 |
| 500,5 | 45   | 32   | 122395  | 2167124 | 23716 | 462662  | 426713 |
| 501,5 | 34   | 25   | 108256  | 2049150 | 25153 | 436523  | 403646 |
| 502,5 | 26   | 19   | 95540   | 1934128 | 26692 | 411281  | 381112 |
| 503,5 | 20   | 15   | 84135   | 1822266 | 28341 | 386955  | 359156 |
| 504,5 | 15   | 12   | 73932   | 1713749 | 30107 | 363563  | 337818 |
| 505,5 | 11   | 9    | 64826   | 1608738 | 31998 | 341116  | 317133 |
| 506,5 | 8    | 7    | 56721   | 1507371 | 34023 | 319626  | 297131 |



|       |   |   |       |         |        |        |        |
|-------|---|---|-------|---------|--------|--------|--------|
| 507,5 | 6 | 5 | 49525 | 1409764 | 36189  | 299098 | 277840 |
| 508,5 | 5 | 4 | 43151 | 1316007 | 38506  | 279535 | 259280 |
| 509,5 | 3 | 3 | 37519 | 1226169 | 40984  | 260936 | 241469 |
| 510,5 | 2 | 2 | 32556 | 1140297 | 43633  | 243298 | 224418 |
| 511,5 | 2 | 2 | 28191 | 1058414 | 46465  | 226615 | 208137 |
| 512,5 | 1 | 1 | 24362 | 980525  | 49489  | 210876 | 192630 |
| 513,5 | 0 | 0 | 21012 | 906615  | 52719  | 196070 | 177898 |
| 514,5 | 0 | 0 | 18086 | 836649  | 56167  | 182181 | 163938 |
| 515,5 | 0 | 0 | 15537 | 770576  | 59845  | 169192 | 150745 |
| 516,5 | 0 | 0 | 13322 | 708331  | 63768  | 157084 | 138311 |
| 517,5 | 0 | 0 | 11400 | 649832  | 67950  | 145836 | 126627 |
| 518,5 | 0 | 0 | 9738  | 594985  | 72405  | 135426 | 115681 |
| 519,5 | 0 | 0 | 8302  | 543685  | 77149  | 125827 | 105464 |
| 520,5 | 0 | 0 | 7065  | 495818  | 82198  | 117016 | 95963  |
| 521,5 | 0 | 0 | 6001  | 451261  | 87569  | 108966 | 87170  |
| 522,5 | 0 | 0 | 5089  | 409883  | 93278  | 101650 | 79078  |
| 523,5 | 0 | 0 | 4307  | 371549  | 99345  | 95040  | 71684  |
| 524,5 | 0 | 0 | 3639  | 336119  | 105786 | 89109  | 64992  |
| 525,5 | 0 | 0 | 3070  | 303452  | 112620 | 83828  | 59008  |
| 526,5 | 0 | 0 | 2585  | 273402  | 119868 | 79171  | 53751  |
| 527,5 | 0 | 0 | 2173  | 245826  | 127549 | 75110  | 49243  |
| 528,5 | 0 | 0 | 1824  | 220580  | 135684 | 71618  | 45510  |
| 529,5 | 0 | 0 | 1528  | 197521  | 144292 | 68668  | 42580  |
| 530,5 | 0 | 0 | 1278  | 176510  | 153396 | 66237  | 40467  |
| 531,5 | 0 | 0 | 1068  | 157410  | 163016 | 64299  | 39167  |
| 532,5 | 0 | 0 | 891   | 140087  | 173175 | 62831  | 38650  |
| 533,5 | 0 | 0 | 742   | 124414  | 183894 | 61810  | 38855  |
| 534,5 | 0 | 0 | 617   | 110266  | 195196 | 61216  | 39701  |
| 535,5 | 0 | 0 | 512   | 97525   | 207102 | 61028  | 41098  |
| 536,5 | 0 | 0 | 425   | 86077   | 219637 | 61228  | 42957  |
| 537,5 | 0 | 0 | 352   | 75816   | 232820 | 61798  | 45199  |
| 538,5 | 0 | 0 | 291   | 66639   | 246676 | 62721  | 47760  |

|       |   |   |     |       |         |        |        |
|-------|---|---|-----|-------|---------|--------|--------|
| 539,5 | 0 | 0 | 240 | 58452 | 261226  | 63984  | 50590  |
| 540,5 | 0 | 0 | 198 | 51164 | 276492  | 65571  | 53651  |
| 541,5 | 0 | 0 | 163 | 44692 | 292496  | 67470  | 56917  |
| 542,5 | 0 | 0 | 134 | 38957 | 309258  | 69670  | 60369  |
| 543,5 | 0 | 0 | 110 | 33888 | 326800  | 72160  | 63997  |
| 544,5 | 0 | 0 | 90  | 29417 | 345141  | 74930  | 67792  |
| 545,5 | 0 | 0 | 74  | 25483 | 364301  | 77972  | 71752  |
| 546,5 | 0 | 0 | 61  | 22029 | 384299  | 81278  | 75875  |
| 547,5 | 0 | 0 | 50  | 19004 | 405151  | 84841  | 80162  |
| 548,5 | 0 | 0 | 41  | 16360 | 426876  | 88655  | 84614  |
| 549,5 | 0 | 0 | 33  | 14055 | 449488  | 92715  | 89235  |
| 550,5 | 0 | 0 | 27  | 12050 | 473002  | 97016  | 94025  |
| 551,5 | 0 | 0 | 22  | 10309 | 497432  | 101552 | 98990  |
| 552,5 | 0 | 0 | 18  | 8802  | 522788  | 106322 | 104131 |
| 553,5 | 0 | 0 | 15  | 7499  | 549083  | 111319 | 109451 |
| 554,5 | 0 | 0 | 12  | 6376  | 576325  | 116543 | 114952 |
| 555,5 | 0 | 0 | 10  | 5410  | 604521  | 121988 | 120638 |
| 556,5 | 0 | 0 | 8   | 4581  | 633676  | 127653 | 126509 |
| 557,5 | 0 | 0 | 6   | 3871  | 663796  | 133535 | 132567 |
| 558,5 | 0 | 0 | 5   | 3265  | 694881  | 139630 | 138814 |
| 559,5 | 0 | 0 | 4   | 2747  | 726933  | 145937 | 145250 |
| 560,5 | 0 | 0 | 3   | 2307  | 759950  | 152452 | 151875 |
| 561,5 | 0 | 0 | 3   | 1934  | 793927  | 159173 | 158689 |
| 562,5 | 0 | 0 | 2   | 1618  | 828859  | 166096 | 165691 |
| 563,5 | 0 | 0 | 2   | 1350  | 864739  | 173218 | 172880 |
| 564,5 | 0 | 0 | 1   | 1125  | 901556  | 180536 | 180255 |
| 565,5 | 0 | 0 | 1   | 935   | 939298  | 188047 | 187813 |
| 566,5 | 0 | 0 | 0   | 776   | 977952  | 195746 | 195552 |
| 567,5 | 0 | 0 | 0   | 642   | 1017501 | 203629 | 203468 |
| 568,5 | 0 | 0 | 0   | 531   | 1057926 | 211691 | 211559 |
| 569,5 | 0 | 0 | 0   | 438   | 1099207 | 219929 | 219819 |
| 570,5 | 0 | 0 | 0   | 360   | 1141321 | 228336 | 228246 |

|       |   |   |   |     |         |        |        |
|-------|---|---|---|-----|---------|--------|--------|
| 571,5 | 0 | 0 | 0 | 296 | 1184243 | 236908 | 236834 |
| 572,5 | 0 | 0 | 0 | 243 | 1227948 | 245638 | 245577 |
| 573,5 | 0 | 0 | 0 | 199 | 1272404 | 254521 | 254471 |
| 574,5 | 0 | 0 | 0 | 162 | 1317583 | 263549 | 263509 |
| 575,5 | 0 | 0 | 0 | 132 | 1363451 | 272717 | 272684 |
| 576,5 | 0 | 0 | 0 | 108 | 1409974 | 282016 | 281989 |
| 577,5 | 0 | 0 | 0 | 87  | 1457115 | 291440 | 291419 |
| 578,5 | 0 | 0 | 0 | 71  | 1504836 | 300981 | 300964 |
| 579,5 | 0 | 0 | 0 | 57  | 1553098 | 310631 | 310617 |
| 580,5 | 0 | 0 | 0 | 46  | 1601860 | 320381 | 320370 |
| 581,5 | 0 | 0 | 0 | 37  | 1651079 | 330223 | 330214 |
| 582,5 | 0 | 0 | 0 | 30  | 1700710 | 340148 | 340141 |
| 583,5 | 0 | 0 | 0 | 24  | 1750709 | 350147 | 350141 |
| 584,5 | 0 | 0 | 0 | 19  | 1801030 | 360210 | 360205 |
| 585,5 | 0 | 0 | 0 | 15  | 1851625 | 370328 | 370324 |
| 586,5 | 0 | 0 | 0 | 12  | 1902446 | 380492 | 380489 |
| 587,5 | 0 | 0 | 0 | 10  | 1953443 | 390691 | 390688 |
| 588,5 | 0 | 0 | 0 | 8   | 2004567 | 400915 | 400913 |
| 589,5 | 0 | 0 | 0 | 6   | 2055768 | 411155 | 411153 |
| 590,5 | 0 | 0 | 0 | 5   | 2106994 | 421400 | 421399 |
| 591,5 | 0 | 0 | 0 | 4   | 2158194 | 431640 | 431639 |
| 592,5 | 0 | 0 | 0 | 3   | 2209317 | 441864 | 441863 |
| 593,5 | 0 | 0 | 0 | 2   | 2260310 | 452063 | 452062 |
| 594,5 | 0 | 0 | 0 | 2   | 2311123 | 462225 | 462224 |
| 595,5 | 0 | 0 | 0 | 1   | 2361702 | 472341 | 472340 |
| 596,5 | 0 | 0 | 0 | 1   | 2411997 | 482400 | 482399 |
| 597,5 | 0 | 0 | 0 | 0   | 2461956 | 492391 | 492391 |
| 598,5 | 0 | 0 | 0 | 0   | 2511527 | 502306 | 502305 |
| 599,5 | 0 | 0 | 0 | 0   | 2560660 | 512132 | 512132 |
| 600,5 | 0 | 0 | 0 | 0   | 2609305 | 521861 | 521861 |
| 601,5 | 0 | 0 | 0 | 0   | 2657412 | 531483 | 531482 |
| 602,5 | 0 | 0 | 0 | 0   | 2704932 | 540986 | 540986 |

|       |   |   |   |   |         |        |        |
|-------|---|---|---|---|---------|--------|--------|
| 603,5 | 0 | 0 | 0 | 0 | 2751816 | 550363 | 550363 |
| 604,5 | 0 | 0 | 0 | 0 | 2798017 | 559604 | 559603 |
| 605,5 | 0 | 0 | 0 | 0 | 2843489 | 568698 | 568698 |
| 606,5 | 0 | 0 | 0 | 0 | 2888185 | 577637 | 577637 |
| 607,5 | 0 | 0 | 0 | 0 | 2932060 | 586412 | 586412 |
| 608,5 | 0 | 0 | 0 | 0 | 2975071 | 595014 | 595014 |
| 609,5 | 0 | 0 | 0 | 0 | 3017175 | 603435 | 603435 |
| 610,5 | 0 | 0 | 0 | 0 | 3058330 | 611666 | 611666 |
| 611,5 | 0 | 0 | 0 | 0 | 3098495 | 619699 | 619699 |
| 612,5 | 0 | 0 | 0 | 0 | 3137632 | 627526 | 627526 |
| 613,5 | 0 | 0 | 0 | 0 | 3175701 | 635140 | 635140 |
| 614,5 | 0 | 0 | 0 | 0 | 3212666 | 642533 | 642533 |
| 615,5 | 0 | 0 | 0 | 0 | 3248492 | 649698 | 649698 |
| 616,5 | 0 | 0 | 0 | 0 | 3283143 | 656629 | 656629 |
| 617,5 | 0 | 0 | 0 | 0 | 3316586 | 663317 | 663317 |
| 618,5 | 0 | 0 | 0 | 0 | 3348790 | 669758 | 669758 |
| 619,5 | 0 | 0 | 0 | 0 | 3379724 | 675945 | 675945 |
| 620,5 | 0 | 0 | 0 | 0 | 3409358 | 681872 | 681872 |
| 621,5 | 0 | 0 | 0 | 0 | 3437665 | 687533 | 687533 |
| 622,5 | 0 | 0 | 0 | 0 | 3464617 | 692923 | 692923 |
| 623,5 | 0 | 0 | 0 | 0 | 3490190 | 698038 | 698038 |
| 624,5 | 0 | 0 | 0 | 0 | 3514360 | 702872 | 702872 |
| 625,5 | 0 | 0 | 0 | 0 | 3537103 | 707421 | 707421 |
| 626,5 | 0 | 0 | 0 | 0 | 3558398 | 711680 | 711680 |
| 627,5 | 0 | 0 | 0 | 0 | 3578226 | 715645 | 715645 |
| 628,5 | 0 | 0 | 0 | 0 | 3596568 | 719314 | 719314 |
| 629,5 | 0 | 0 | 0 | 0 | 3613406 | 722681 | 722681 |
| 630,5 | 0 | 0 | 0 | 0 | 3628725 | 725745 | 725745 |
| 631,5 | 0 | 0 | 0 | 0 | 3642509 | 728502 | 728502 |
| 632,5 | 0 | 0 | 0 | 0 | 3654745 | 730949 | 730949 |
| 633,5 | 0 | 0 | 0 | 0 | 3665422 | 733084 | 733084 |
| 634,5 | 0 | 0 | 0 | 0 | 3674528 | 734906 | 734906 |

|       |   |   |   |   |         |        |        |
|-------|---|---|---|---|---------|--------|--------|
| 635,5 | 0 | 0 | 0 | 0 | 3682055 | 736411 | 736411 |
| 636,5 | 0 | 0 | 0 | 0 | 3687994 | 737599 | 737599 |
| 637,5 | 0 | 0 | 0 | 0 | 3692339 | 738468 | 738468 |
| 638,5 | 0 | 0 | 0 | 0 | 3695084 | 739017 | 739017 |
| 639,5 | 0 | 0 | 0 | 0 | 3696226 | 739245 | 739245 |
| 640,5 | 0 | 0 | 0 | 0 | 3695761 | 739152 | 739152 |
| 641,5 | 0 | 0 | 0 | 0 | 3693690 | 738738 | 738738 |
| 642,5 | 0 | 0 | 0 | 0 | 3690011 | 738002 | 738002 |
| 643,5 | 0 | 0 | 0 | 0 | 3684727 | 736945 | 736945 |
| 644,5 | 0 | 0 | 0 | 0 | 3677840 | 735568 | 735568 |
| 645,5 | 0 | 0 | 0 | 0 | 3669355 | 733871 | 733871 |
| 646,5 | 0 | 0 | 0 | 0 | 3659278 | 731856 | 731856 |
| 647,5 | 0 | 0 | 0 | 0 | 3647616 | 729523 | 729523 |
| 648,5 | 0 | 0 | 0 | 0 | 3634378 | 726876 | 726876 |
| 649,5 | 0 | 0 | 0 | 0 | 3619573 | 723915 | 723915 |
| 650,5 | 0 | 0 | 0 | 0 | 3603214 | 720643 | 720643 |
| 651,5 | 0 | 0 | 0 | 0 | 3585314 | 717063 | 717063 |
| 652,5 | 0 | 0 | 0 | 0 | 3565886 | 713177 | 713177 |
| 653,5 | 0 | 0 | 0 | 0 | 3544948 | 708990 | 708990 |
| 654,5 | 0 | 0 | 0 | 0 | 3522517 | 704503 | 704503 |
| 655,5 | 0 | 0 | 0 | 0 | 3498612 | 699722 | 699722 |
| 656,5 | 0 | 0 | 0 | 0 | 3473253 | 694651 | 694651 |
| 657,5 | 0 | 0 | 0 | 0 | 3446463 | 689293 | 689293 |
| 658,5 | 0 | 0 | 0 | 0 | 3418267 | 683653 | 683653 |
| 659,5 | 0 | 0 | 0 | 0 | 3388688 | 677738 | 677738 |
| 660,5 | 0 | 0 | 0 | 0 | 3357753 | 671551 | 671551 |
| 661,5 | 0 | 0 | 0 | 0 | 3325492 | 665098 | 665098 |
| 662,5 | 0 | 0 | 0 | 0 | 3291935 | 658387 | 658387 |
| 663,5 | 0 | 0 | 0 | 0 | 3257111 | 651422 | 651422 |
| 664,5 | 0 | 0 | 0 | 0 | 3221055 | 644211 | 644211 |
| 665,5 | 0 | 0 | 0 | 0 | 3183801 | 636760 | 636760 |
| 666,5 | 0 | 0 | 0 | 0 | 3145385 | 629077 | 629077 |

|       |   |   |   |   |         |        |        |
|-------|---|---|---|---|---------|--------|--------|
| 667,5 | 0 | 0 | 0 | 0 | 3105844 | 621169 | 621169 |
| 668,5 | 0 | 0 | 0 | 0 | 3065217 | 613043 | 613043 |
| 669,5 | 0 | 0 | 0 | 0 | 3023544 | 604709 | 604709 |
| 670,5 | 0 | 0 | 0 | 0 | 2980866 | 596173 | 596173 |
| 671,5 | 0 | 0 | 0 | 0 | 2937228 | 587446 | 587446 |
| 672,5 | 0 | 0 | 0 | 0 | 2892671 | 578534 | 578534 |
| 673,5 | 0 | 0 | 0 | 0 | 2847243 | 569449 | 569449 |
| 674,5 | 0 | 0 | 0 | 0 | 2800990 | 560198 | 560198 |
| 675,5 | 0 | 0 | 0 | 0 | 2753958 | 550792 | 550792 |
| 676,5 | 0 | 0 | 0 | 0 | 2706198 | 541240 | 541240 |
| 677,5 | 0 | 0 | 0 | 0 | 2657757 | 531551 | 531551 |
| 678,5 | 0 | 0 | 0 | 0 | 2608688 | 521738 | 521738 |
| 679,5 | 0 | 0 | 0 | 0 | 2559042 | 511808 | 511808 |
| 680,5 | 0 | 0 | 0 | 0 | 2508869 | 501774 | 501774 |
| 681,5 | 0 | 0 | 0 | 0 | 2458224 | 491645 | 491645 |
| 682,5 | 0 | 0 | 0 | 0 | 2407159 | 481432 | 481432 |
| 683,5 | 0 | 0 | 0 | 0 | 2355729 | 471146 | 471146 |
| 684,5 | 0 | 0 | 0 | 0 | 2303987 | 460797 | 460797 |
| 685,5 | 0 | 0 | 0 | 0 | 2251988 | 450398 | 450398 |
| 686,5 | 0 | 0 | 0 | 0 | 2199786 | 439957 | 439957 |
| 687,5 | 0 | 0 | 0 | 0 | 2147437 | 429487 | 429487 |
| 688,5 | 0 | 0 | 0 | 0 | 2094994 | 418999 | 418999 |
| 689,5 | 0 | 0 | 0 | 0 | 2042511 | 408502 | 408502 |
| 690,5 | 0 | 0 | 0 | 0 | 1990044 | 398009 | 398009 |
| 691,5 | 0 | 0 | 0 | 0 | 1937646 | 387529 | 387529 |
| 692,5 | 0 | 0 | 0 | 0 | 1885369 | 377074 | 377074 |
| 693,5 | 0 | 0 | 0 | 0 | 1833267 | 366653 | 366653 |
| 694,5 | 0 | 0 | 0 | 0 | 1781391 | 356278 | 356278 |
| 695,5 | 0 | 0 | 0 | 0 | 1729792 | 345958 | 345958 |
| 696,5 | 0 | 0 | 0 | 0 | 1678521 | 335704 | 335704 |
| 697,5 | 0 | 0 | 0 | 0 | 1627625 | 325525 | 325525 |
| 698,5 | 0 | 0 | 0 | 0 | 1577154 | 315431 | 315431 |

|       |   |   |   |   |         |        |        |
|-------|---|---|---|---|---------|--------|--------|
| 699,5 | 0 | 0 | 0 | 0 | 1527152 | 305430 | 305430 |
| 700,5 | 0 | 0 | 0 | 0 | 1477666 | 295533 | 295533 |
| 701,5 | 0 | 0 | 0 | 0 | 1428738 | 285748 | 285748 |
| 702,5 | 0 | 0 | 0 | 0 | 1380411 | 276082 | 276082 |
| 703,5 | 0 | 0 | 0 | 0 | 1332724 | 266545 | 266545 |
| 704,5 | 0 | 0 | 0 | 0 | 1285717 | 257143 | 257143 |
| 705,5 | 0 | 0 | 0 | 0 | 1239426 | 247885 | 247885 |
| 706,5 | 0 | 0 | 0 | 0 | 1193885 | 238777 | 238777 |
| 707,5 | 0 | 0 | 0 | 0 | 1149128 | 229826 | 229826 |
| 708,5 | 0 | 0 | 0 | 0 | 1105185 | 221037 | 221037 |
| 709,5 | 0 | 0 | 0 | 0 | 1062085 | 212417 | 212417 |
| 710,5 | 0 | 0 | 0 | 0 | 1019854 | 203971 | 203971 |
| 711,5 | 0 | 0 | 0 | 0 | 978516  | 195703 | 195703 |
| 712,5 | 0 | 0 | 0 | 0 | 938095  | 187619 | 187619 |
| 713,5 | 0 | 0 | 0 | 0 | 898609  | 179722 | 179722 |
| 714,5 | 0 | 0 | 0 | 0 | 860077  | 172015 | 172015 |
| 715,5 | 0 | 0 | 0 | 0 | 822513  | 164503 | 164503 |
| 716,5 | 0 | 0 | 0 | 0 | 785932  | 157186 | 157186 |
| 717,5 | 0 | 0 | 0 | 0 | 750344  | 150069 | 150069 |
| 718,5 | 0 | 0 | 0 | 0 | 715758  | 143152 | 143152 |
| 719,5 | 0 | 0 | 0 | 0 | 682181  | 136436 | 136436 |
| 720,5 | 0 | 0 | 0 | 0 | 649617  | 129923 | 129923 |
| 721,5 | 0 | 0 | 0 | 0 | 618069  | 123614 | 123614 |
| 722,5 | 0 | 0 | 0 | 0 | 587537  | 117507 | 117507 |
| 723,5 | 0 | 0 | 0 | 0 | 558020  | 111604 | 111604 |
| 724,5 | 0 | 0 | 0 | 0 | 529513  | 105903 | 105903 |
| 725,5 | 0 | 0 | 0 | 0 | 502012  | 100402 | 100402 |
| 726,5 | 0 | 0 | 0 | 0 | 475510  | 95102  | 95102  |
| 727,5 | 0 | 0 | 0 | 0 | 449996  | 89999  | 89999  |
| 728,5 | 0 | 0 | 0 | 0 | 425462  | 85092  | 85092  |
| 729,5 | 0 | 0 | 0 | 0 | 401894  | 80379  | 80379  |
| 730,5 | 0 | 0 | 0 | 0 | 379279  | 75856  | 75856  |

|       |   |   |   |   |        |       |       |
|-------|---|---|---|---|--------|-------|-------|
| 731,5 | 0 | 0 | 0 | 0 | 357602 | 71520 | 71520 |
| 732,5 | 0 | 0 | 0 | 0 | 336847 | 67369 | 67369 |
| 733,5 | 0 | 0 | 0 | 0 | 316996 | 63399 | 63399 |
| 734,5 | 0 | 0 | 0 | 0 | 298031 | 59606 | 59606 |
| 735,5 | 0 | 0 | 0 | 0 | 279932 | 55986 | 55986 |
| 736,5 | 0 | 0 | 0 | 0 | 262678 | 52536 | 52536 |
| 737,5 | 0 | 0 | 0 | 0 | 246249 | 49250 | 49250 |
| 738,5 | 0 | 0 | 0 | 0 | 230622 | 46124 | 46124 |
| 739,5 | 0 | 0 | 0 | 0 | 215775 | 43155 | 43155 |
| 740,5 | 0 | 0 | 0 | 0 | 201685 | 40337 | 40337 |
| 741,5 | 0 | 0 | 0 | 0 | 188328 | 37666 | 37666 |
| 742,5 | 0 | 0 | 0 | 0 | 175679 | 35136 | 35136 |
| 743,5 | 0 | 0 | 0 | 0 | 163716 | 32743 | 32743 |
| 744,5 | 0 | 0 | 0 | 0 | 152414 | 30483 | 30483 |
| 745,5 | 0 | 0 | 0 | 0 | 141749 | 28350 | 28350 |
| 746,5 | 0 | 0 | 0 | 0 | 131695 | 26339 | 26339 |
| 747,5 | 0 | 0 | 0 | 0 | 122229 | 24446 | 24446 |
| 748,5 | 0 | 0 | 0 | 0 | 113327 | 22665 | 22665 |
| 749,5 | 0 | 0 | 0 | 0 | 104965 | 20993 | 20993 |
| 750,5 | 0 | 0 | 0 | 0 | 97119  | 19424 | 19424 |
| 751,5 | 0 | 0 | 0 | 0 | 89766  | 17953 | 17953 |
| 752,5 | 0 | 0 | 0 | 0 | 82883  | 16577 | 16577 |
| 753,5 | 0 | 0 | 0 | 0 | 76447  | 15289 | 15289 |
| 754,5 | 0 | 0 | 0 | 0 | 70436  | 14087 | 14087 |
| 755,5 | 0 | 0 | 0 | 0 | 64829  | 12966 | 12966 |
| 756,5 | 0 | 0 | 0 | 0 | 59605  | 11921 | 11921 |
| 757,5 | 0 | 0 | 0 | 0 | 54743  | 10949 | 10949 |
| 758,5 | 0 | 0 | 0 | 0 | 50224  | 10045 | 10045 |
| 759,5 | 0 | 0 | 0 | 0 | 46028  | 9206  | 9206  |
| 760,5 | 0 | 0 | 0 | 0 | 42138  | 8428  | 8428  |
| 761,5 | 0 | 0 | 0 | 0 | 38534  | 7707  | 7707  |
| 762,5 | 0 | 0 | 0 | 0 | 35200  | 7040  | 7040  |



|       |   |   |   |   |       |      |      |
|-------|---|---|---|---|-------|------|------|
| 763,5 | 0 | 0 | 0 | 0 | 32119 | 6424 | 6424 |
| 764,5 | 0 | 0 | 0 | 0 | 29276 | 5855 | 5855 |
| 765,5 | 0 | 0 | 0 | 0 | 26655 | 5331 | 5331 |
| 766,5 | 0 | 0 | 0 | 0 | 24242 | 4848 | 4848 |
| 767,5 | 0 | 0 | 0 | 0 | 22023 | 4405 | 4405 |
| 768,5 | 0 | 0 | 0 | 0 | 19985 | 3997 | 3997 |
| 769,5 | 0 | 0 | 0 | 0 | 18116 | 3623 | 3623 |
| 770,5 | 0 | 0 | 0 | 0 | 16403 | 3281 | 3281 |
| 771,5 | 0 | 0 | 0 | 0 | 14835 | 2967 | 2967 |
| 772,5 | 0 | 0 | 0 | 0 | 13402 | 2680 | 2680 |
| 773,5 | 0 | 0 | 0 | 0 | 12094 | 2419 | 2419 |
| 774,5 | 0 | 0 | 0 | 0 | 10901 | 2180 | 2180 |
| 775,5 | 0 | 0 | 0 | 0 | 9815  | 1963 | 1963 |
| 776,5 | 0 | 0 | 0 | 0 | 8826  | 1765 | 1765 |
| 777,5 | 0 | 0 | 0 | 0 | 7929  | 1586 | 1586 |
| 778,5 | 0 | 0 | 0 | 0 | 7114  | 1423 | 1423 |
| 779,5 | 0 | 0 | 0 | 0 | 6376  | 1275 | 1275 |
| 780,5 | 0 | 0 | 0 | 0 | 5708  | 1142 | 1142 |
| 781,5 | 0 | 0 | 0 | 0 | 5104  | 1021 | 1021 |
| 782,5 | 0 | 0 | 0 | 0 | 4559  | 912  | 912  |
| 783,5 | 0 | 0 | 0 | 0 | 4067  | 813  | 813  |
| 784,5 | 0 | 0 | 0 | 0 | 3624  | 725  | 725  |
| 785,5 | 0 | 0 | 0 | 0 | 3226  | 645  | 645  |
| 786,5 | 0 | 0 | 0 | 0 | 2868  | 574  | 574  |
| 787,5 | 0 | 0 | 0 | 0 | 2547  | 509  | 509  |
| 788,5 | 0 | 0 | 0 | 0 | 2259  | 452  | 452  |
| 789,5 | 0 | 0 | 0 | 0 | 2001  | 400  | 400  |
| 790,5 | 0 | 0 | 0 | 0 | 1771  | 354  | 354  |
| 791,5 | 0 | 0 | 0 | 0 | 1565  | 313  | 313  |
| 792,5 | 0 | 0 | 0 | 0 | 1382  | 276  | 276  |
| 793,5 | 0 | 0 | 0 | 0 | 1219  | 244  | 244  |
| 794,5 | 0 | 0 | 0 | 0 | 1073  | 215  | 215  |

|       |   |   |   |   |     |     |     |
|-------|---|---|---|---|-----|-----|-----|
| 795,5 | 0 | 0 | 0 | 0 | 944 | 189 | 189 |
| 796,5 | 0 | 0 | 0 | 0 | 830 | 166 | 166 |
| 797,5 | 0 | 0 | 0 | 0 | 728 | 146 | 146 |
| 798,5 | 0 | 0 | 0 | 0 | 638 | 128 | 128 |
| 799,5 | 0 | 0 | 0 | 0 | 559 | 112 | 112 |
| 800,5 | 0 | 0 | 0 | 0 | 489 | 98  | 98  |
| 801,5 | 0 | 0 | 0 | 0 | 427 | 85  | 85  |
| 802,5 | 0 | 0 | 0 | 0 | 373 | 75  | 75  |
| 803,5 | 0 | 0 | 0 | 0 | 325 | 65  | 65  |
| 804,5 | 0 | 0 | 0 | 0 | 283 | 57  | 57  |
| 805,5 | 0 | 0 | 0 | 0 | 246 | 49  | 49  |
| 806,5 | 0 | 0 | 0 | 0 | 213 | 43  | 43  |
| 807,5 | 0 | 0 | 0 | 0 | 185 | 37  | 37  |
| 808,5 | 0 | 0 | 0 | 0 | 160 | 32  | 32  |
| 809,5 | 0 | 0 | 0 | 0 | 139 | 28  | 28  |
| 810,5 | 0 | 0 | 0 | 0 | 120 | 24  | 24  |
| 811,5 | 0 | 0 | 0 | 0 | 103 | 21  | 21  |
| 812,5 | 0 | 0 | 0 | 0 | 89  | 18  | 18  |
| 813,5 | 0 | 0 | 0 | 0 | 77  | 15  | 15  |
| 814,5 | 0 | 0 | 0 | 0 | 66  | 13  | 13  |
| 815,5 | 0 | 0 | 0 | 0 | 57  | 11  | 11  |
| 816,5 | 0 | 0 | 0 | 0 | 49  | 10  | 10  |
| 817,5 | 0 | 0 | 0 | 0 | 42  | 8   | 8   |
| 818,5 | 0 | 0 | 0 | 0 | 36  | 7   | 7   |
| 819,5 | 0 | 0 | 0 | 0 | 31  | 6   | 6   |
| 820,5 | 0 | 0 | 0 | 0 | 26  | 5   | 5   |
| 821,5 | 0 | 0 | 0 | 0 | 22  | 4   | 4   |
| 822,5 | 0 | 0 | 0 | 0 | 19  | 4   | 4   |
| 823,5 | 0 | 0 | 0 | 0 | 16  | 3   | 3   |
| 824,5 | 0 | 0 | 0 | 0 | 14  | 3   | 3   |
| 825,5 | 0 | 0 | 0 | 0 | 12  | 2   | 2   |
| 826,5 | 0 | 0 | 0 | 0 | 10  | 2   | 2   |

|       |   |   |   |   |   |   |   |
|-------|---|---|---|---|---|---|---|
| 827,5 | 0 | 0 | 0 | 0 | 8 | 2 | 2 |
| 828,5 | 0 | 0 | 0 | 0 | 7 | 1 | 1 |
| 829,5 | 0 | 0 | 0 | 0 | 6 | 1 | 1 |
| 830,5 | 0 | 0 | 0 | 0 | 5 | 1 | 1 |
| 831,5 | 0 | 0 | 0 | 0 | 4 | 0 | 0 |
| 832,5 | 0 | 0 | 0 | 0 | 4 | 0 | 0 |
| 833,5 | 0 | 0 | 0 | 0 | 3 | 0 | 0 |
| 834,5 | 0 | 0 | 0 | 0 | 3 | 0 | 0 |
| 835,5 | 0 | 0 | 0 | 0 | 2 | 0 | 0 |
| 836,5 | 0 | 0 | 0 | 0 | 2 | 0 | 0 |
| 837,5 | 0 | 0 | 0 | 0 | 1 | 0 | 0 |
| 838,5 | 0 | 0 | 0 | 0 | 1 | 0 | 0 |
| 839,5 | 0 | 0 | 0 | 0 | 1 | 0 | 0 |
| 840,5 | 0 | 0 | 0 | 0 | 0 | 0 | 0 |
| 841,5 | 0 | 0 | 0 | 0 | 0 | 0 | 0 |
| 842,5 | 0 | 0 | 0 | 0 | 0 | 0 | 0 |
| 843,5 | 0 | 0 | 0 | 0 | 0 | 0 | 0 |
| 844,5 | 0 | 0 | 0 | 0 | 0 | 0 | 0 |
| 845,5 | 0 | 0 | 0 | 0 | 0 | 0 | 0 |
| 846,5 | 0 | 0 | 0 | 0 | 0 | 0 | 0 |
| 847,5 | 0 | 0 | 0 | 0 | 0 | 0 | 0 |
| 848,5 | 0 | 0 | 0 | 0 | 0 | 0 | 0 |
| 849,5 | 0 | 0 | 0 | 0 | 0 | 0 | 0 |
| 850,5 | 0 | 0 | 0 | 0 | 0 | 0 | 0 |
| 851,5 | 0 | 0 | 0 | 0 | 0 | 0 | 0 |
| 852,5 | 0 | 0 | 0 | 0 | 0 | 0 | 0 |
| 853,5 | 0 | 0 | 0 | 0 | 0 | 0 | 0 |
| 854,5 | 0 | 0 | 0 | 0 | 0 | 0 | 0 |
| 855,5 | 0 | 0 | 0 | 0 | 0 | 0 | 0 |
| 856,5 | 0 | 0 | 0 | 0 | 0 | 0 | 0 |
| 857,5 | 0 | 0 | 0 | 0 | 0 | 0 | 0 |
| 858,5 | 0 | 0 | 0 | 0 | 0 | 0 | 0 |

|       |   |   |   |   |   |   |   |
|-------|---|---|---|---|---|---|---|
| 859,5 | 0 | 0 | 0 | 0 | 0 | 0 | 0 |
| 860,5 | 0 | 0 | 0 | 0 | 0 | 0 | 0 |
| 861,5 | 0 | 0 | 0 | 0 | 0 | 0 | 0 |
| 862,5 | 0 | 0 | 0 | 0 | 0 | 0 | 0 |
| 863,5 | 0 | 0 | 0 | 0 | 0 | 0 | 0 |
| 864,5 | 0 | 0 | 0 | 0 | 0 | 0 | 0 |
| 865,5 | 0 | 0 | 0 | 0 | 0 | 0 | 0 |
| 866,5 | 0 | 0 | 0 | 0 | 0 | 0 | 0 |
| 867,5 | 0 | 0 | 0 | 0 | 0 | 0 | 0 |
| 868,5 | 0 | 0 | 0 | 0 | 0 | 0 | 0 |
| 869,5 | 0 | 0 | 0 | 0 | 0 | 0 | 0 |
| 870,5 | 0 | 0 | 0 | 0 | 0 | 0 | 0 |
| 871,5 | 0 | 0 | 0 | 0 | 0 | 0 | 0 |
| 872,5 | 0 | 0 | 0 | 0 | 0 | 0 | 0 |
| 873,5 | 0 | 0 | 0 | 0 | 0 | 0 | 0 |
| 874,5 | 0 | 0 | 0 | 0 | 0 | 0 | 0 |
| 875,5 | 0 | 0 | 0 | 0 | 0 | 0 | 0 |
| 876,5 | 0 | 0 | 0 | 0 | 0 | 0 | 0 |
| 877,5 | 0 | 0 | 0 | 0 | 0 | 0 | 0 |
| 878,5 | 0 | 0 | 0 | 0 | 0 | 0 | 0 |
| 879,5 | 0 | 0 | 0 | 0 | 0 | 0 | 0 |
| 880,5 | 0 | 0 | 0 | 0 | 0 | 0 | 0 |
| 881,5 | 0 | 0 | 0 | 0 | 0 | 0 | 0 |
| 882,5 | 0 | 0 | 0 | 0 | 0 | 0 | 0 |
| 883,5 | 0 | 0 | 0 | 0 | 0 | 0 | 0 |
| 884,5 | 0 | 0 | 0 | 0 | 0 | 0 | 0 |
| 885,5 | 0 | 0 | 0 | 0 | 0 | 0 | 0 |
| 886,5 | 0 | 0 | 0 | 0 | 0 | 0 | 0 |
| 887,5 | 0 | 0 | 0 | 0 | 0 | 0 | 0 |
| 888,5 | 0 | 0 | 0 | 0 | 0 | 0 | 0 |
| 889,5 | 0 | 0 | 0 | 0 | 0 | 0 | 0 |
| 890,5 | 0 | 0 | 0 | 0 | 0 | 0 | 0 |

|       |   |   |   |   |   |   |   |
|-------|---|---|---|---|---|---|---|
| 891,5 | 0 | 0 | 0 | 0 | 0 | 0 | 0 |
| 892,5 | 0 | 0 | 0 | 0 | 0 | 0 | 0 |
| 893,5 | 0 | 0 | 0 | 0 | 0 | 0 | 0 |
| 894,5 | 0 | 0 | 0 | 0 | 0 | 0 | 0 |
| 895,5 | 0 | 0 | 0 | 0 | 0 | 0 | 0 |
| 896,5 | 0 | 0 | 0 | 0 | 0 | 0 | 0 |
| 897,5 | 0 | 0 | 0 | 0 | 0 | 0 | 0 |
| 898,5 | 0 | 0 | 0 | 0 | 0 | 0 | 0 |
| 899,5 | 0 | 0 | 0 | 0 | 0 | 0 | 0 |
| 900,5 | 0 | 0 | 0 | 0 | 0 | 0 | 0 |
| 901,5 | 0 | 0 | 0 | 0 | 0 | 0 | 0 |
| 902,5 | 0 | 0 | 0 | 0 | 0 | 0 | 0 |
| 903,5 | 0 | 0 | 0 | 0 | 0 | 0 | 0 |
| 904,5 | 0 | 0 | 0 | 0 | 0 | 0 | 0 |
| 905,5 | 0 | 0 | 0 | 0 | 0 | 0 | 0 |
| 906,5 | 0 | 0 | 0 | 0 | 0 | 0 | 0 |
| 907,5 | 0 | 0 | 0 | 0 | 0 | 0 | 0 |
| 908,5 | 0 | 0 | 0 | 0 | 0 | 0 | 0 |
| 909,5 | 0 | 0 | 0 | 0 | 0 | 0 | 0 |
| 910,5 | 0 | 0 | 0 | 0 | 0 | 0 | 0 |
| 911,5 | 0 | 0 | 0 | 0 | 0 | 0 | 0 |
| 912,5 | 0 | 0 | 0 | 0 | 0 | 0 | 0 |
| 913,5 | 0 | 0 | 0 | 0 | 0 | 0 | 0 |
| 914,5 | 0 | 0 | 0 | 0 | 0 | 0 | 0 |
| 915,5 | 0 | 0 | 0 | 0 | 0 | 0 | 0 |
| 916,5 | 0 | 0 | 0 | 0 | 0 | 0 | 0 |
| 917,5 | 0 | 0 | 0 | 0 | 0 | 0 | 0 |
| 918,5 | 0 | 0 | 0 | 0 | 0 | 0 | 0 |
| 919,5 | 0 | 0 | 0 | 0 | 0 | 0 | 0 |
| 920,5 | 0 | 0 | 0 | 0 | 0 | 0 | 0 |
| 921,5 | 0 | 0 | 0 | 0 | 0 | 0 | 0 |
| 922,5 | 0 | 0 | 0 | 0 | 0 | 0 | 0 |

|       |   |   |   |   |   |   |   |
|-------|---|---|---|---|---|---|---|
| 923,5 | 0 | 0 | 0 | 0 | 0 | 0 | 0 |
| 924,5 | 0 | 0 | 0 | 0 | 0 | 0 | 0 |
| 925,5 | 0 | 0 | 0 | 0 | 0 | 0 | 0 |
| 926,5 | 0 | 0 | 0 | 0 | 0 | 0 | 0 |
| 927,5 | 0 | 0 | 0 | 0 | 0 | 0 | 0 |
| 928,5 | 0 | 0 | 0 | 0 | 0 | 0 | 0 |
| 929,5 | 0 | 0 | 0 | 0 | 0 | 0 | 0 |
| 930,5 | 0 | 0 | 0 | 0 | 0 | 0 | 0 |
| 931,5 | 0 | 0 | 0 | 0 | 0 | 0 | 0 |
| 932,5 | 0 | 0 | 0 | 0 | 0 | 0 | 0 |
| 933,5 | 0 | 0 | 0 | 0 | 0 | 0 | 0 |
| 934,5 | 0 | 0 | 0 | 0 | 0 | 0 | 0 |
| 935,5 | 0 | 0 | 0 | 0 | 0 | 0 | 0 |
| 936,5 | 0 | 0 | 0 | 0 | 0 | 0 | 0 |
| 937,5 | 0 | 0 | 0 | 0 | 0 | 0 | 0 |
| 938,5 | 0 | 0 | 0 | 0 | 0 | 0 | 0 |
| 939,5 | 0 | 0 | 0 | 0 | 0 | 0 | 0 |
| 940,5 | 0 | 0 | 0 | 0 | 0 | 0 | 0 |
| 941,5 | 0 | 0 | 0 | 0 | 0 | 0 | 0 |
| 942,5 | 0 | 0 | 0 | 0 | 0 | 0 | 0 |
| 943,5 | 0 | 0 | 0 | 0 | 0 | 0 | 0 |
| 944,5 | 0 | 0 | 0 | 0 | 0 | 0 | 0 |
| 945,5 | 0 | 0 | 0 | 0 | 0 | 0 | 0 |
| 946,5 | 0 | 0 | 0 | 0 | 0 | 0 | 0 |
| 947,5 | 0 | 0 | 0 | 0 | 0 | 0 | 0 |
| 948,5 | 0 | 0 | 0 | 0 | 0 | 0 | 0 |
| 949,5 | 0 | 0 | 0 | 0 | 0 | 0 | 0 |
| 950,5 | 0 | 0 | 0 | 0 | 0 | 0 | 0 |
| 951,5 | 0 | 0 | 0 | 0 | 0 | 0 | 0 |
| 952,5 | 0 | 0 | 0 | 0 | 0 | 0 | 0 |
| 953,5 | 0 | 0 | 0 | 0 | 0 | 0 | 0 |
| 954,5 | 0 | 0 | 0 | 0 | 0 | 0 | 0 |

|       |   |   |   |   |   |   |   |
|-------|---|---|---|---|---|---|---|
| 955,5 | 0 | 0 | 0 | 0 | 0 | 0 | 0 |
| 956,5 | 0 | 0 | 0 | 0 | 0 | 0 | 0 |
| 957,5 | 0 | 0 | 0 | 0 | 0 | 0 | 0 |
| 958,5 | 0 | 0 | 0 | 0 | 0 | 0 | 0 |
| 959,5 | 0 | 0 | 0 | 0 | 0 | 0 | 0 |
| 960,5 | 0 | 0 | 0 | 0 | 0 | 0 | 0 |
| 961,5 | 0 | 0 | 0 | 0 | 0 | 0 | 0 |
| 962,5 | 0 | 0 | 0 | 0 | 0 | 0 | 0 |
| 963,5 | 0 | 0 | 0 | 0 | 0 | 0 | 0 |
| 964,5 | 0 | 0 | 0 | 0 | 0 | 0 | 0 |
| 965,5 | 0 | 0 | 0 | 0 | 0 | 0 | 0 |
| 966,5 | 0 | 0 | 0 | 0 | 0 | 0 | 0 |
| 967,5 | 0 | 0 | 0 | 0 | 0 | 0 | 0 |
| 968,5 | 0 | 0 | 0 | 0 | 0 | 0 | 0 |
| 969,5 | 0 | 0 | 0 | 0 | 0 | 0 | 0 |
| 970,5 | 0 | 0 | 0 | 0 | 0 | 0 | 0 |
| 971,5 | 0 | 0 | 0 | 0 | 0 | 0 | 0 |
| 972,5 | 0 | 0 | 0 | 0 | 0 | 0 | 0 |
| 973,5 | 0 | 0 | 0 | 0 | 0 | 0 | 0 |
| 974,5 | 0 | 0 | 0 | 0 | 0 | 0 | 0 |
| 975,5 | 0 | 0 | 0 | 0 | 0 | 0 | 0 |
| 976,5 | 0 | 0 | 0 | 0 | 0 | 0 | 0 |
| 977,5 | 0 | 0 | 0 | 0 | 0 | 0 | 0 |
| 978,5 | 0 | 0 | 0 | 0 | 0 | 0 | 0 |
| 979,5 | 0 | 0 | 0 | 0 | 0 | 0 | 0 |
| 980,5 | 0 | 0 | 0 | 0 | 0 | 0 | 0 |
| 981,5 | 0 | 0 | 0 | 0 | 0 | 0 | 0 |
| 982,5 | 0 | 0 | 0 | 0 | 0 | 0 | 0 |
| 983,5 | 0 | 0 | 0 | 0 | 0 | 0 | 0 |
| 984,5 | 0 | 0 | 0 | 0 | 0 | 0 | 0 |
| 985,5 | 0 | 0 | 0 | 0 | 0 | 0 | 0 |
| 986,5 | 0 | 0 | 0 | 0 | 0 | 0 | 0 |

|       |   |   |   |   |   |   |   |
|-------|---|---|---|---|---|---|---|
| 987,5 | 0 | 0 | 0 | 0 | 0 | 0 | 0 |
| 988,5 | 0 | 0 | 0 | 0 | 0 | 0 | 0 |
| 989,5 | 0 | 0 | 0 | 0 | 0 | 0 | 0 |
| 990,5 | 0 | 0 | 0 | 0 | 0 | 0 | 0 |
| 991,5 | 0 | 0 | 0 | 0 | 0 | 0 | 0 |
| 992,5 | 0 | 0 | 0 | 0 | 0 | 0 | 0 |
| 993,5 | 0 | 0 | 0 | 0 | 0 | 0 | 0 |
| 994,5 | 0 | 0 | 0 | 0 | 0 | 0 | 0 |
| 995,5 | 0 | 0 | 0 | 0 | 0 | 0 | 0 |
| 996,5 | 0 | 0 | 0 | 0 | 0 | 0 | 0 |
| 997,5 | 0 | 0 | 0 | 0 | 0 | 0 | 0 |
| 998,5 | 0 | 0 | 0 | 0 | 0 | 0 | 0 |
| 999,5 | 0 | 0 | 0 | 0 | 0 | 0 | 0 |



| <b>Figure 1 c (DLS)</b>                                     |             |
|-------------------------------------------------------------|-------------|
| # size[nm]= t[μs]*conv                                      |             |
| #conv=1.38*temperature/(3.0*pi*viscosity)*q^2/10^7=0.149986 |             |
| t [μs]                                                      | g1 ^2       |
| 27777,77847                                                 | 60,23055556 |
| 0.5                                                         | 59641,20764 |
| 41666,66806                                                 | 59724,59653 |
| 48611,11042                                                 | 60624,53333 |
| 55555,55625                                                 | 60000,51528 |
| 1                                                           | 59557,57917 |
| 1.2                                                         | 60252,66736 |
| 1.4                                                         | 59188,44514 |
| 1.6                                                         | 59896,24097 |
| 2                                                           | 59748,74444 |
| 2777,861806                                                 | 59179,98472 |
| 3                                                           | 59491,65    |
| 4                                                           | 59397,68194 |
| 5                                                           | 59214,96944 |
| 6                                                           | 59136,75486 |
| 7                                                           | 58911,08611 |
| 8                                                           | 58980,31806 |
| 9                                                           | 58375,30764 |
| 10                                                          | 58554,63403 |
| 11                                                          | 58339,92569 |
| 12                                                          | 57806,52292 |
| 14                                                          | 57924,14306 |
| 16                                                          | 57404,36667 |
| 18                                                          | 56926,25556 |
| 20                                                          | 56897,00833 |
| 22                                                          | 56268,65208 |
| 24                                                          | 56175,58681 |
| 26                                                          | 56128,51528 |
| 28                                                          | 55732,12083 |
| 30                                                          | 55230,40833 |
| 32                                                          | 55169,34653 |
| 36                                                          | 54263,26667 |
| 40                                                          | 53917,41181 |
| 44                                                          | 53280,33056 |
| 48                                                          | 52593,88542 |
| 54                                                          | 51688,36042 |
| 60                                                          | 5117,474306 |
| 68                                                          | 49990,57569 |

|      |             |
|------|-------------|
| 78   | 48943,69653 |
| 88   | 47232,93125 |
| 100  | 46168,12986 |
| 112  | 44708,74653 |
| 124  | 43565,12639 |
| 136  | 42182,72431 |
| 150  | 40977,83542 |
| 165  | 39361,25347 |
| 180  | 37964,39722 |
| 200  | 36291,69583 |
| 250  | 32381,26736 |
| 300  | 29072,94375 |
| 350  | 26144,88056 |
| 400  | 23573,21944 |
| 450  | 21330,46736 |
| 500  | 19316,62986 |
| 550  | 17543,9     |
| 600  | 16011,79931 |
| 650  | 14606,42431 |
| 700  | 13343,84375 |
| 750  | 12223,31181 |
| 800  | 11216,89792 |
| 850  | 10348,76667 |
| 900  | 95,16944444 |
| 950  | 8804,082639 |
| 1000 | 8157,879167 |
| 1050 | 7572,570833 |
| 1100 | 7081,20625  |
| 1150 | 65356,34514 |
| 1200 | 60922,51458 |
| 1300 | 52951,23889 |
| 1400 | 46189,025   |
| 1500 | 40404,32431 |
| 1600 | 35835,225   |
| 1700 | 3162,929861 |
| 1900 | 24773,86944 |
| 2000 | 22066,58264 |
| 2200 | 18136,99028 |
| 2400 | 15541,79306 |
| 2500 | 14417,3375  |
| 2700 | 12673,40903 |
| 2900 | 10871,61389 |
| 3100 | 9136,295139 |

|       |              |
|-------|--------------|
| 3300  | 8074,838194  |
| 3500  | 66035,17431  |
| 3700  | 54033,14375  |
| 3900  | 42081,61181  |
| 4100  | 32981,98958  |
| 4300  | 31659,10069  |
| 4500  | 27773,21806  |
| 4900  | 3289,672222  |
| 5300  | 23980,88125  |
| 5700  | 19885,55486  |
| 6100  | 12249,55486  |
| 6500  | 1090,7625    |
| 6900  | 14584,06458  |
| 7300  | 41996,34444  |
| 7700  | 9696,494444  |
| 8100  | 40994,65694  |
| 8500  | 13934,20972  |
| 9300  | 18450,07917  |
| 10100 | 21821,87361  |
| 10900 | 16399,51875  |
| 11700 | -10598,84097 |
| 12500 | -44119,74792 |
| 13300 | -30,994345   |
| 14100 | 230,07341    |
| 14900 | 9569,007639  |
| 15700 | 56069,63125  |
| 16500 | 23965,97986  |
| 18100 | -406,59375   |
| 19700 | -54169,73056 |
| 21300 | -29984,37986 |
| 22900 | -33614,45347 |
| 24500 | 23783,85486  |
| 26100 | -51847,64514 |
| 27700 | -25658,90694 |
| 29300 | -15409,83472 |
| 30900 | -9273,053472 |
| 32500 | -8262,260417 |
| 35700 | -10768,54792 |
| 38900 | -9568,179167 |
| 42100 | 773,66654    |
| 45300 | -7416,622222 |
| 48500 | -3248,859028 |
| 51700 | 9704,772917  |

|         |              |
|---------|--------------|
| 54900   | -47460,09097 |
| 58100   | -11701,10972 |
| 61300   | -85,11524    |
| 64500   | 8683,218056  |
| 70900   | -9217,996528 |
| 77300   | -8462,597917 |
| 83700   | -12968,11319 |
| 90100   | 11846,39653  |
| 96500   | -23184,49861 |
| 102900  | -8304,480556 |
| 109300  | 9863,71875   |
| 115700  | 26002,46736  |
| 122100  | 15869,70069  |
| 128500  | -581,14302   |
| 141300  | -5654,15     |
| 154100  | 61293,30417  |
| 166900  | -9754,856944 |
| 179700  | -22314,43194 |
| 192500  | 12061,63472  |
| 205300  | -15784,84653 |
| 218100  | -22345,06875 |
| 230900  | -65308,33056 |
| 243700  | -21,457624   |
| 256500  | 8131,876389  |
| 282100  | -34591,30486 |
| 307700  | -41582,42431 |
| 333300  | 9318,999306  |
| 358900  | -59815,60278 |
| 384500  | -18889,24792 |
| 410100  | -11672,55    |
| 435700  | -8613,264583 |
| 461300  | 45671,95556  |
| 486900  | 9759,410417  |
| 500000  | -772,47445   |
| 600000  | -43929,34514 |
| 700000  | 736,71174    |
| 800000  | 21494,87639  |
| 900000  | -62452,28056 |
| 1000000 | -7680,288889 |
| 1250000 | -32331,30069 |
| 1500000 | -20575,96667 |
|         |              |

**Figure 1 e(AFM)****Metadata File for Experiment Nanoalgosomes****[Experiment information]**

|                           |                             |
|---------------------------|-----------------------------|
| Type of Experiment        | AFM imaging                 |
| Purpose of the experiment | Determine EV shape and size |
| Operator Name             | Samuele Raccosta            |

**[Samples design, methods, data processing]**

|                    |                                                                                                                                    |
|--------------------|------------------------------------------------------------------------------------------------------------------------------------|
| Sample description | Nanoalgosomes in PBS (lot # EB2 by dUC)                                                                                            |
| Instrumentation    | JPK NanoWizard 3                                                                                                                   |
| Experiment Name    | EB2dUC_TM_5                                                                                                                        |
| Analysis notes     | Tapping mode in air as in Adamo et al. 2021 JEV, <a href="http://doi.org/10.1002/jev2.12081">http://doi.org/10.1002/jev2.12081</a> |

**[Experimental conditions]**

|                  |                  |
|------------------|------------------|
| FRAME            | Image            |
| Image size       | 2 x 2 um         |
| Image resolution | 256 x 256 pixels |
| Height scale     | 0 - 20 nm        |

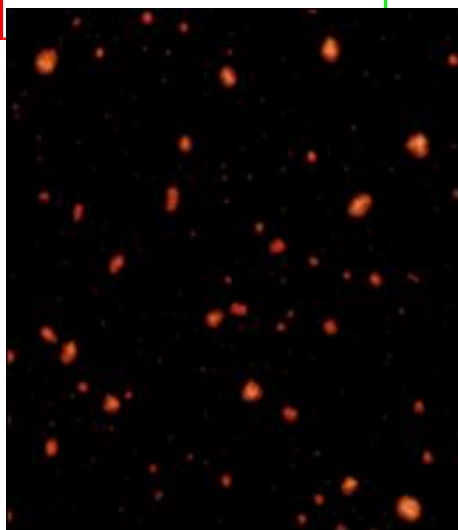

**Figure 1e inset (AFM)****Metadata File for Experiment Nanoalgosomes****[Experiment information]**

|                           |                             |
|---------------------------|-----------------------------|
| Type of Experiment        | AFM imaging                 |
| Purpose of the experiment | Determine EV shape and size |
| Operator Name             | Samuele Raccosta            |

**[Samples design, methods, data processing]**

|                    |                                                                                                                                    |
|--------------------|------------------------------------------------------------------------------------------------------------------------------------|
| Sample description | Nanoalgosomes in PBS (lot # EB2 by dUC)                                                                                            |
| Instrumentation    | JPK NanoWizard 3                                                                                                                   |
| Experiment Name    | EB2dUC_TM_16                                                                                                                       |
| Analysis notes     | Tapping mode in air as in Adamo et al. 2021 JEV, <a href="http://doi.org/10.1002/jev2.12081">http://doi.org/10.1002/jev2.12081</a> |

**[Experimental conditions]**

|                  |                  |
|------------------|------------------|
| FRAME            | Image            |
| Image size       | 500 x 500 nm     |
| Image resolution | 256 x 256 pixels |
| Height scale     | 0 - 20 nm        |

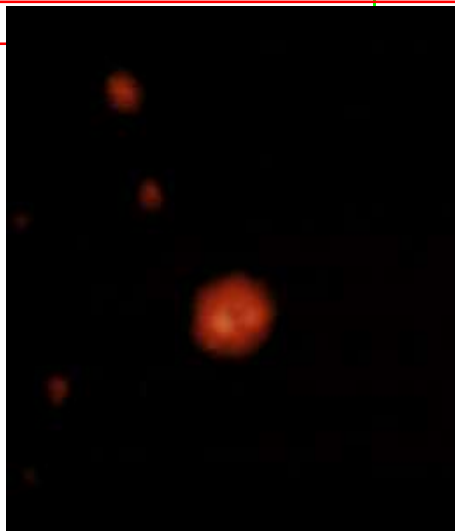

**Figure 1 f (WB)**

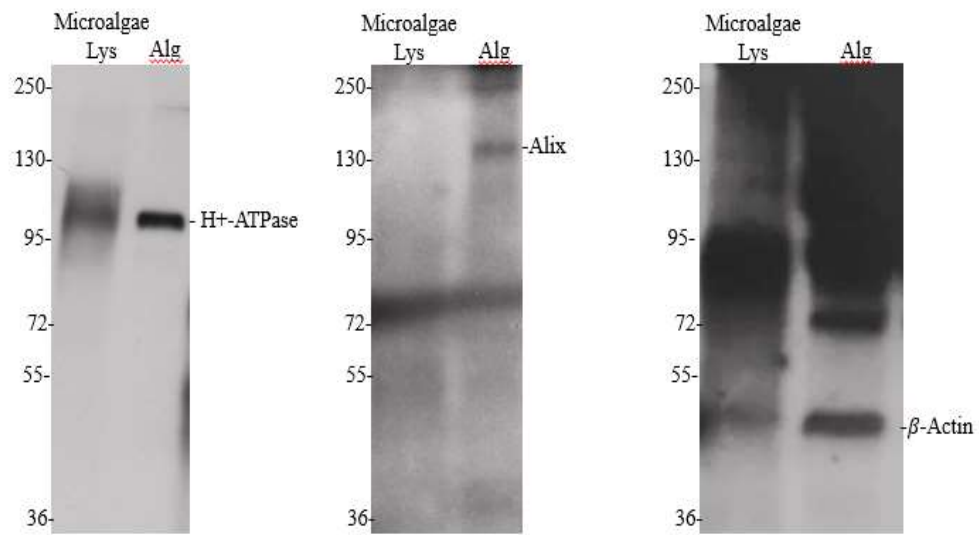

**Figure 2 a**

|    | F-algosome<br>at 37C | EIPA 10<br>$\mu$ M | Nystatin<br>50 $\mu$ M | Dynasore<br>60 $\mu$ M | F-algosome<br>at 4C | (background<br>at 37°C) | (background<br>at 4°C) |
|----|----------------------|--------------------|------------------------|------------------------|---------------------|-------------------------|------------------------|
| 2H | 28,8                 | 28,9               | 29,9                   | 23,1                   | 26,9                | 21,1                    | 22,2                   |
|    | 28,2                 | 28,1               | 29,9                   | 23,9                   | 26,9                | 21,1                    | 23,7                   |
|    | 28,7                 | 28,2               | 29,4                   | 23                     | 25,9                | 19,1                    | 24,7                   |
| 3H | 29,1                 | 30,4               | 29,5                   | 23,2                   | 24,7                | 19,7                    | 21,3                   |
|    | 30                   | 31,9               | 29,9                   | 23,4                   | 25,8                | 20                      | 22,4                   |
|    | 29,1                 | 31,1               | 28,8                   | 23,3                   | 26,6                | 19,9                    | 22,5                   |



Figure 4a

|              | FC1  | FC2  | FC3  |
|--------------|------|------|------|
| <b>ATR</b>   | 1,11 | 0,9  | 1,57 |
| <b>CHEK1</b> | 0,93 | 0,79 | 0,9  |
| <b>RAD51</b> | 1,35 | 1,44 | 1,13 |

Figure 4 b Genotoxicity assessment in vivo

**Quantification of apoptotic corpses in the germline**

| treatments | mock | Algosome | Doxo |
|------------|------|----------|------|
|            | 3    | 5        | 3    |
|            | 4    | 5        | 5    |
|            | 3    | 2        | 6    |
|            | 3    | 1        | 3    |
|            | 4    | 4        | 6    |
|            | 2    | 2        | 4    |
|            | 2    | 2        | 4    |
|            | 4    | 3        | 3    |
|            | 3    | 5        | 6    |
|            | 3    | 2        | 5    |
|            | 2    | 2        | 6    |
|            | 2    | 6        | 2    |
|            | 7    | 7        | 7    |
|            | 1    | 4        | 3    |
|            | 2    | 5        | 6    |
|            | 4    | 3        | 6    |
|            | 1    | 3        | 3    |
|            | 3    | 3        | 4    |
|            | 5    | 4        | 3    |
|            | 2    | 3        | 5    |
|            | 1    | 5        | 7    |
|            | 5    | 6        | 9    |
|            | 0    | 2        | 6    |
|            | 2    | 1        | 3    |
|            | 2    | 1        | 6    |
|            | 2    | 7        | 3    |

graphs have been done using with raw

boxes divide replicates

each cell is a different animal

|   |   |    |
|---|---|----|
| 2 | 3 | 4  |
| 1 | 5 | 7  |
| 1 | 4 | 5  |
| 2 | 2 | 7  |
| 2 | 1 | 6  |
| 4 | 1 | 3  |
| 6 | 7 | 8  |
| 7 | 3 | 1  |
| 8 | 0 | 4  |
| 4 | 2 | 3  |
| 6 | 4 | 3  |
| 8 | 6 | 6  |
| 1 | 2 | 7  |
| 7 | 4 | 4  |
| 5 | 2 | 8  |
| 6 | 8 | 6  |
| 6 | 3 | 10 |
| 5 | 6 | 2  |
| 3 | 6 | 5  |
| 5 | 6 | 12 |
| 1 | 3 | 6  |
| 1 | 1 | 13 |
| 1 | 3 | 5  |
| 5 | 5 | 8  |
| 1 | 0 | 7  |
| 2 | 0 | 9  |
| 8 | 6 | 3  |
| 2 | 2 | 6  |
| 6 | 1 | 8  |
| 5 | 1 | 4  |
| 4 | 2 | 7  |
| 3 | 1 | 4  |

|   |   |    |
|---|---|----|
| 1 | 5 | 11 |
| 6 | 0 | 6  |
| 3 | 5 | 7  |
| 4 | 6 | 5  |
| 7 | 2 | 4  |
| 6 | 2 | 4  |
| 9 | 5 | 7  |
| 4 | 3 | 5  |
| 2 | 1 | 8  |
| 0 | 3 |    |
| 3 | 7 |    |
| 3 | 2 |    |
| 7 | 3 |    |
|   | 2 |    |
|   | 5 |    |
|   | 2 |    |
|   | 4 |    |
|   | 2 |    |
|   | 2 |    |
|   | 4 |    |
|   | 3 |    |
|   | 1 |    |
|   | 1 |    |
|   | 3 |    |

Figure 5a

Number of viable animals after chronic treatment in liquido  
from eggs  
data used for graph

| treatment with algosome |    |                |    |                |    |                |    |           |    |
|-------------------------|----|----------------|----|----------------|----|----------------|----|-----------|----|
| mock                    |    | 1ng/μl         |    | 20ng/μl        |    | 64ng/μl        |    | 128ng/μl  |    |
| living animals          | n  | living animals | n  | living animals | n  | living animals | n  | of living | n  |
| 100                     | 19 | 100            | 31 | 100            | 25 | 100            | 33 | 100       | 24 |
| 100                     | 25 | 100            | 27 | 100            | 15 | 100            | 26 | 100       | 30 |
| 100                     | 25 | 100            | 20 | 100            | 27 | 100            | 21 | 100       | 25 |
| 100                     | 37 | 100            | 24 | 100            | 24 | 100            | 27 | 100       | 20 |
| 106                     |    | 102            |    | 91             |    | 107            |    | 99        |    |

| raw data treatment with algosome |             |                |             |                |             |                |             |                |             |
|----------------------------------|-------------|----------------|-------------|----------------|-------------|----------------|-------------|----------------|-------------|
| mock                             |             | 1ng/μl         |             | 20ng/μl        |             | 64ng/μl        |             | 128ng/μl       |             |
| living animals                   | tot animals | living animals | tot animals | living animals | tot animals | living animals | tot animals | living animals | tot animals |
| 19                               | 19          | 31             | 31          | 25             | 25          | 33             | 33          | 24             | 24          |
| 25                               | 25          | 27             | 27          | 15             | 15          | 26             | 26          | 30             | 30          |
| 25                               | 25          | 20             | 20          | 27             | 27          | 21             | 21          | 25             | 25          |
| 37                               | 37          | 24             | 24          | 24             | 24          | 27             | 27          | 20             | 20          |

each row represents a replicate

Figure 5b

**Number of adult animals after chronic treatment in liquido from eggs**

data used for graph

treatment with algosome

| mock |    | 1ng/μl |    | 20ng/μl |    | 64ng/μl |    | 128ng/μl |    |
|------|----|--------|----|---------|----|---------|----|----------|----|
| % of | n  | % of   | n  | % of    | n  | % of    | n  | % of     | n  |
| 100  | 19 | 100    | 31 | 100     | 25 | 100     | 33 | 91,7     | 24 |
| 100  | 25 | 100    | 27 | 100     | 15 | 100     | 26 | 100      | 30 |
| 100  | 25 | 94,7   | 20 | 100     | 27 | 100     | 21 | 100      | 25 |
| 100  | 37 | 100    | 24 | 100     | 24 | 92,6    | 27 | 100      | 20 |
| 106  |    | 102    |    | 91      |    | 107     |    | 99       |    |

raw data

treatment with algosome

| mock          |        |             | 1ng/μl        |        |             | 20ng/μl       |        |             |
|---------------|--------|-------------|---------------|--------|-------------|---------------|--------|-------------|
| adult animals | larvae | tot animals | adult animals | larvae | tot animals | adult animals | larvae | tot animals |
| 19            | 0      | 19          | 31            | 0      | 31          | 25            | 0      | 25          |
| 25            | 0      | 25          | 27            | 0      | 27          | 15            | 0      | 15          |
| 25            | 0      | 25          | 19            | 1      | 20          | 27            | 0      | 27          |
| 37            | 0      | 37          | 24            | 0      | 24          | 24            | 0      | 24          |

| 64ng/μl       |        |             | 128ng/μl      |        |             |
|---------------|--------|-------------|---------------|--------|-------------|
| adult animals | larvae | tot animals | adult animals | larvae | tot animals |
| 33            | 0      | 33          | 22            | 2      | 24          |
| 26            | 0      | 26          | 30            | 0      | 30          |
| 21            | 0      | 21          | 25            | 0      | 25          |
| 25            | 2      | 27          | 20            | 0      | 20          |

each row represents a replicate

Figure 5c

**% of animals in each developmental stage quantified every 24 hours**

**data used for graph**

|      |          | Adult |    |   | Young adult |     |   | L4 larval stage |     |   | L3 larval stage |    |   | L2 larval stage |     |   | L1 larval stage |    |   |
|------|----------|-------|----|---|-------------|-----|---|-----------------|-----|---|-----------------|----|---|-----------------|-----|---|-----------------|----|---|
|      |          | mean  | SD | n | mean        | SD  | n | mean            | SD  | n | mean            | SD | n | mean            | SD  | n | mean            | SD | n |
| 24 h | mock     |       |    |   |             |     |   |                 |     |   |                 |    |   |                 |     |   | 100             | 0  | 2 |
|      | Algosome |       |    |   |             |     |   |                 |     |   |                 |    |   |                 |     |   | 100             | 0  | 2 |
| 48 h | mock     |       |    |   |             |     |   | 96,2            | 2,9 | 2 |                 |    |   | 3,8             | 2,9 | 2 |                 |    |   |
|      | Algosome |       |    |   |             |     |   | 95,9            | 0,1 | 2 |                 |    |   | 4,1             | 0,1 | 2 |                 |    |   |
| 72 h | mock     |       |    |   | 95,9        | 3   | 2 | 4,1             | 3   | 2 |                 |    |   |                 |     |   |                 |    |   |
|      | Algosome |       |    |   | 94          | 3,1 | 2 | 6               | 3,1 | 2 |                 |    |   |                 |     |   |                 |    |   |
| 96 h | mock     | 100   | 0  | 2 | 0           | 0   | 2 |                 |     |   |                 |    |   |                 |     |   |                 |    |   |
|      | Algosome | 97,9  | 3  | 2 | 2,1         | 3   | 2 |                 |     |   |                 |    |   |                 |     |   |                 |    |   |

**raw data**

|      |          | replicate 1  |               | replicate 2     |               |
|------|----------|--------------|---------------|-----------------|---------------|
|      |          | larval stage | total animals | L1 larval stage | total animals |
| 24 h | mock     | 114          | 114           | 120             | 120           |
|      | Algosome | 82           | 82            | 78              | 78            |

|      |      | replicate 1  |                 |               | replicate 2     |                 |               |
|------|------|--------------|-----------------|---------------|-----------------|-----------------|---------------|
|      |      | larval stage | L3 larval stage | total animals | L2 larval stage | L3 larval stage | total animals |
| 48 h | mock | 2            | 115             | 117           | 6               | 97              | 103           |

|      |          |   |    |    |   |    |    |
|------|----------|---|----|----|---|----|----|
| 72 h | Algosome | 4 | 91 | 95 | 4 | 95 | 99 |
|------|----------|---|----|----|---|----|----|

|      |          | replicate 1 |             |         | replicate 2  |             |         |
|------|----------|-------------|-------------|---------|--------------|-------------|---------|
|      |          | larval stag | young adult | animals | larval stage | young adult | animals |
| 72 h | mock     | 6           | 90          | 96      | 2            | 98          | 100     |
|      | Algosome | 7           | 78          | 85      | 4            | 100         | 104     |

|      |          | replicate 1 |       |               | replicate 2 |       |               |
|------|----------|-------------|-------|---------------|-------------|-------|---------------|
|      |          | young adult | adult | total animals | young adult | adult | total animals |
| 96 h | mock     | 0           | 119   | 119           | 0           | 106   | 106           |
|      | Algosome | 0           | 78    | 78            | 4           | 90    | 94            |

**% from raw data**

|      |          | replicate 1 |       | replicate 2 |       | mean L SD |   |
|------|----------|-------------|-------|-------------|-------|-----------|---|
|      |          | %L1         | tot % | %L1         | tot % |           |   |
| 24 h | mock     | 100         | 100   | 100         | 100   | 100       | 0 |
|      | Algosome | 100         | 100   | 100         | 100   | 100       | 0 |

|      |          | replicate 1 |       |       | replicate 2 |       |       | mean SD |     | mear SD |        |
|------|----------|-------------|-------|-------|-------------|-------|-------|---------|-----|---------|--------|
|      |          | %L2         | %L3   | tot % | %L2         | %L3   | tot % |         |     |         |        |
| 48 h | mock     | 1,71        | 98,29 | 100   | 5,825       | 94,17 | 100   | 3,77    | 2,9 | 96,2    | 2,9103 |
|      | Algosome | 4,21        | 95,79 | 100   | 4,04        | 95,96 | 100   | 4,13    | 0,1 | 95,9    | 0,1203 |

|      |          | replicate 1 |       |       | replicate 2 |       |       | mean SD |     | mear SD |        |
|------|----------|-------------|-------|-------|-------------|-------|-------|---------|-----|---------|--------|
|      |          | %L4         | %YA   | tot % | %L4         | %YA   | tot % |         |     |         |        |
| 72 h | mock     | 6,25        | 93,75 | 100   | 2           | 98    | 100   | 4,13    | 3   | 95,9    | 3,0052 |
|      | Algosome | 8,24        | 91,76 | 100   | 3,846       | 96,15 | 100   | 6,04    | 3,1 | 94      | 3,1036 |

|  |  | replicate 1 |    |       | replicate 2 |    |       | mean SD |  | mear SD |  |
|--|--|-------------|----|-------|-------------|----|-------|---------|--|---------|--|
|  |  | %YA         | %A | tot % | %YA         | %A | tot % |         |  |         |  |



|      |          |   |     |     |       |       |     |      |   |      |       |
|------|----------|---|-----|-----|-------|-------|-----|------|---|------|-------|
| 96 h | mock     | 0 | 100 | 100 | 0     | 100   | 100 | 0    | 0 | 100  | 0     |
|      | Algosome | 0 | 100 | 100 | 4,255 | 95,74 | 100 | 2,13 | 3 | 97,9 | 3,009 |

Figure 5d

**lifespan assay**

1= dead animal

**data used for graph**

| days | dead event on mock | dead events on | raw data |                  |      |                     |      |  |
|------|--------------------|----------------|----------|------------------|------|---------------------|------|--|
| 3    | 0                  | 0              |          |                  |      |                     |      |  |
| 6    | 1                  |                |          |                  |      |                     |      |  |
| 6    | 1                  | 0              |          |                  |      |                     |      |  |
| 9    | 1                  | 1              | days     | mock replicate 1 |      | mock replicate 2    |      |  |
|      |                    |                |          | alive            | dead | alive               | dead |  |
| 9    | 1                  | 1              | 1        | 36               | 0    | 38                  | 0    |  |
| 9    | 1                  | 1              | 3        | 36               | 0    | 38                  | 0    |  |
| 9    | 1                  | 1              | 6        | 35               | 1    | 38                  | 0    |  |
| 9    | 1                  | 1              | 9        | 28               | 7    | 31                  | 7    |  |
| 9    | 1                  | 1              | 12       | 26               | 2    | 29                  | 2    |  |
| 9    | 1                  | 1              | 15       | 20               | 6    | 22                  | 7    |  |
| 9    | 1                  | 1              | 18       | 10               | 10   | 10                  | 12   |  |
| 9    | 1                  | 1              | 21       | 1                | 9    | 1                   | 9    |  |
| 9    | 1                  | 1              | 24       | 0                | 1    | 0                   | 1    |  |
| 9    | 1                  | 1              | days     | mock replicate 3 |      | alosome replicate 1 |      |  |
|      |                    |                |          | alive            | dead | alive               | dead |  |
| 9    | 1                  | 1              | 1        | 37               | 0    | 30                  | 0    |  |
| 9    | 1                  | 1              | 3        | 37               | 0    | 30                  | 0    |  |
| 9    | 1                  | 1              | 6        | 36               | 1    | 30                  | 0    |  |

|    |   |   |      |                         |      |                         |      |
|----|---|---|------|-------------------------|------|-------------------------|------|
| 9  | 1 |   | 9    | 30                      | 6    | 26                      | 4    |
| 9  | 1 |   | 12   | 27                      | 3    | 21                      | 5    |
| 9  | 1 |   | 15   | 20                      | 7    | 16                      | 5    |
| 9  | 1 |   | 18   | 12                      | 8    | 4                       | 12   |
| 9  | 1 |   | 21   | 2                       | 10   | 1                       | 3    |
| 12 | 1 | 1 | 24   | 0                       | 2    | 0                       | 1    |
| 12 | 1 | 1 |      | algosome replicate<br>2 |      | algosome replicate<br>3 |      |
| 12 | 1 | 1 | days | alive                   | dead | alive                   | dead |
| 12 | 1 | 1 | 1    | 32                      | 0    | 28                      | 0    |
| 12 | 1 | 1 | 3    | 32                      | 0    | 28                      | 0    |
| 12 |   | 1 | 6    | 32                      | 0    | 28                      | 0    |
| 12 |   | 1 | 9    | 26                      | 6    | 26                      | 2    |
| 12 |   | 1 | 12   | 23                      | 3    | 22                      | 4    |
| 12 |   | 1 | 15   | 16                      | 7    | 12                      | 10   |
| 12 |   | 1 | 18   | 8                       | 8    | 4                       | 8    |
| 12 |   | 1 | 21   | 0                       | 8    | 0                       | 4    |
| 15 | 1 | 1 | 24   | 0                       | 0    | 0                       | 0    |
| 15 | 1 | 1 |      |                         |      |                         |      |
| 15 | 1 | 1 |      |                         |      |                         |      |
| 15 | 1 | 1 |      |                         |      |                         |      |
| 15 | 1 | 1 |      |                         |      |                         |      |

|    |   |   |
|----|---|---|
| 15 | 1 | 1 |
| 15 | 1 | 1 |
| 15 | 1 | 1 |
| 15 | 1 | 1 |
| 15 | 1 | 1 |
| 15 | 1 | 1 |
| 15 | 1 | 1 |
| 15 | 1 | 1 |
| 15 | 1 | 1 |
| 15 | 1 | 1 |
| 15 | 1 | 1 |
| 15 | 1 | 1 |
| 15 | 1 | 1 |
| 15 | 1 | 1 |
| 15 | 1 | 1 |
| 15 | 1 | 1 |
| 15 | 1 | 1 |
| 15 | 1 | 1 |
| 15 | 1 | 1 |
| 15 | 1 | 1 |
| 15 | 1 | 1 |
| 18 | 1 | 1 |
| 18 | 1 | 1 |
| 18 | 1 | 1 |
| 18 | 1 | 1 |





|    |   |   |
|----|---|---|
| 21 | 1 |   |
| 21 | 1 |   |
| 21 | 1 |   |
| 21 | 1 |   |
| 21 | 1 |   |
| 21 | 1 |   |
| 21 | 1 |   |
| 21 | 1 |   |
| 21 | 1 |   |
| 21 | 1 |   |
| 21 | 1 |   |
| 21 | 1 |   |
| 21 | 1 |   |
| 24 | 1 | 1 |
| 24 | 1 |   |
| 24 | 1 |   |
| 24 | 1 |   |

Figure 5e

### broodsize

| replicates | eggs on<br>mock | eggs on<br>Algosome |
|------------|-----------------|---------------------|
| 1          | 162             | 185                 |
| 2          | 146             | 201                 |
| 3          | 113             | 229                 |
| 4          | 182             | 178                 |
| 5          | 178             | 158                 |
| 6          | 152             | 204                 |
| 7          | 160             | 180                 |
| 8          | 188             | 166                 |
| 9          | 124             | 156                 |
| 10         | 170             | 134                 |
| 11         | 175             | 206                 |

Graphs have been done using raw data

each row represents the number of total laid  
eggs/animal



Figure 5f

**embryonic lethality**

| raw data | data used for graph |           |           |      | data used for graph |           |           |          |
|----------|---------------------|-----------|-----------|------|---------------------|-----------|-----------|----------|
|          | P0                  | mock      |           | mock | P0                  | Algosome  |           | Algosome |
|          |                     | laid eggs | dead eggs |      |                     | laid eggs | dead eggs |          |
|          | 1                   | 162       | 3         | 1,85 | 1                   | 185       | 2         | 1,08     |
|          | 2                   | 146       | 3         | 2,05 | 2                   | 201       | 1         | 0,50     |
|          | 3                   | 113       | 1         | 0,88 | 3                   | 229       | 2         | 0,87     |
|          | 4                   | 182       | 2         | 1,10 | 4                   | 178       | 0         | 0,00     |
|          | 5                   | 178       | 1         | 0,56 | 5                   | 158       | 0         | 0,00     |
|          | 6                   | 152       | 0         | 0,00 | 6                   | 204       | 2         | 0,98     |
|          | 7                   | 160       | 3         | 1,88 | 7                   | 180       | 1         | 0,56     |
|          | 8                   | 188       | 2         | 1,06 | 8                   | 166       | 1         | 0,60     |
|          | 9                   | 124       | 2         | 1,61 | 9                   | 156       | 4         | 2,56     |
|          | 10                  | 170       | 0         | 0,00 | 10                  | 134       | 1         | 0,75     |
|          | 11                  | 175       | 0         | 0,00 | 11                  | 206       | 1         | 0,49     |
|          | tot                 | 1750      | 17        |      | tot                 | 1997      | 15        |          |

Figure 5g

**Quantification of the number of visible GABA  
MNs**

| visible<br>GABA | visible<br>GABA |
|-----------------|-----------------|
| 19              | 19              |
| 19              | 19              |
| 19              | 19              |
| 19              | 19              |
| 19              | 19              |
| 18              | 19              |
| 19              | 19              |
| 19              | 19              |
| 19              | 19              |
| 19              | 19              |
| 19              | 19              |
| 19              | 19              |
| 19              | 19              |

graphs have been done using with raw data

boxes divide replicates

each cell is a different animal



|    |    |
|----|----|
| 19 | 19 |
| 19 | 19 |
| 19 | 19 |
| 19 | 19 |
| 19 | 19 |
| 19 | 19 |
| 18 | 19 |
| 19 | 19 |
| 18 | 19 |
| 19 | 19 |
| 19 | 19 |
| 19 | 18 |
| 19 | 19 |
| 19 | 19 |
| 18 | 19 |
| 19 | 19 |
| 19 | 19 |







Figure 5h

**Quantification of the number of visible dopaminergic neurons in the head  
(CEP+ADE)**

| visible<br>CEP and<br>ADE | visible<br>CEP and<br>ADE |
|---------------------------|---------------------------|
| 6                         | 6                         |
| 6                         | 6                         |
| 6                         | 6                         |
| 6                         | 6                         |
| 6                         | 6                         |
| 6                         | 6                         |
| 6                         | 6                         |
| 6                         | 6                         |
| 6                         | 6                         |
| 6                         | 6                         |
| 6                         | 6                         |
| 6                         | 6                         |
| 6                         | 6                         |
| 6                         | 6                         |
| 6                         | 6                         |
| 6                         | 6                         |
| 6                         | 6                         |
| 6                         | 6                         |
| 6                         | 6                         |
| 6                         | 6                         |
| 6                         | 5                         |
| 6                         | 6                         |
| 6                         | 6                         |
| 6                         | 6                         |

graphs have been done using with raw data

boxes divide replicates

each cell is a different animal







|   |   |
|---|---|
| 6 | 6 |
| 6 | 6 |
| 6 | 6 |
| 6 | 6 |
| 6 | 6 |
| 6 | 6 |
| 6 | 6 |
| 6 | 6 |
| 6 | 6 |
| 6 | 6 |
| 3 | 6 |
| 6 | 6 |
| 6 | 6 |
| 6 | 6 |
| 6 | 6 |
| 6 | 6 |

Figure 5i

### Quantification of the number of visible MEC neurons

| visible MEC neurons after treatment with mock | visible MEC neurons after treatment with Algosome |
|-----------------------------------------------|---------------------------------------------------|
| 6                                             | 6                                                 |
| 6                                             | 6                                                 |
| 6                                             | 6                                                 |
| 6                                             | 6                                                 |
| 6                                             | 6                                                 |
| 6                                             | 6                                                 |
| 6                                             | 6                                                 |
| 6                                             | 6                                                 |
| 6                                             | 6                                                 |
| 5                                             | 6                                                 |
| 6                                             | 6                                                 |
| 6                                             | 6                                                 |
| 6                                             | 6                                                 |
| 6                                             | 6                                                 |
| 6                                             | 6                                                 |
| 6                                             | 6                                                 |
| 6                                             | 6                                                 |
| 4                                             | 6                                                 |
| 2                                             | 6                                                 |

graphs have been done using with raw

boxes divide replicates

each cell is a different animal







Figure 6d

| groupe  | time | Total Radiant Efficiency [p/s] / [ $\mu\text{W}/\text{cm}^2$ ] | Stdev Radiant Efficiency |
|---------|------|----------------------------------------------------------------|--------------------------|
| Control | T3   | 1,39E+10                                                       | 1,39E+06                 |
|         | T6   | 1,65E+10                                                       | 2,39E+06                 |
|         | T24  | 1,25E+10                                                       | 1,50E+06                 |
|         | T48  | 1,38E+10                                                       | 1,20E+06                 |
| Dose 1  | T3   | 3,58E+10                                                       | 2,56E+07                 |
|         | T6   | 4,67E+10                                                       | 3,86E+07                 |
|         | T24  | 5,21E+10                                                       | 3,75E+07                 |
|         | T48  | 7,22E+10                                                       | 4,84E+07                 |
| Dose 2  | T3   | 7,59E+10                                                       | 5,68E+07                 |
|         | T6   | 1,08E+11                                                       | 9,34E+07                 |
|         | T24  | 1,75E+11                                                       | 1,37E+08                 |
|         | T48  | 1,95E+11                                                       | 1,47E+08                 |



Figure 6f

| Bone(femour) | time | Total Radiant Efficiency<br>[p/s]/[μW/cm <sup>2</sup> ] |
|--------------|------|---------------------------------------------------------|
|              | 3h   | 9.19E+08                                                |
|              |      | 1.53E+09                                                |
|              |      | 8.43E+08                                                |
|              |      | 1.34E+09                                                |
|              |      | 1.19E+09                                                |
|              |      | 1.20E+09                                                |
|              | 6h   | 1.15E+09                                                |
|              |      | 1.95E+09                                                |
|              |      | 1.23E+09                                                |
|              |      | 1.39E+09                                                |
|              |      | 1.53E+09                                                |
|              |      | 2.03E+09                                                |
|              | 24h  | 3.10E+09                                                |
|              |      | 4.96E+09                                                |
|              |      | 3.33E+09                                                |
|              |      | 4.21E+09                                                |
|              |      | 3.38E+09                                                |
|              |      | 4.46E+09                                                |
|              | 48   | 3.30E+09                                                |
|              |      | 5.30E+09                                                |
|              |      | 4.31E+09                                                |
|              |      | 5.45E+09                                                |
|              |      | 3.38E+09                                                |
|              |      | 5.85E+09                                                |

Figure 7a

| NT-cells | LPS 10ng/ml | Algosome 0,5µg/mL | Algosome 0,5µg/mL + LPS 10ng/ml |
|----------|-------------|-------------------|---------------------------------|
| 0,667    | 0,658       | 0,722             | 0,633                           |
| 0,636    | 0,628       | 0,618             | 0,654                           |
| 0,652    | 0,643       | 0,688             | 0,664                           |

Figure 7b

| Fold Change | NT-Cells | LPS 10ng/ml | Alg0,5µg/ml+LPS 10ng/ml | Alg 0.5µg/ml | Alg 0,1µg/ml |
|-------------|----------|-------------|-------------------------|--------------|--------------|
| FC1         | 1        | 90,317      | 18,772                  | 3,674        | 0,153        |
| FC2         | 1        | 96,617      | 19,783                  | 4,686        | 0,41         |
| FC3         | 1        | 108,517     | 26,337                  | 6,257        | 0,627        |

Figure 7c

|                       |         |
|-----------------------|---------|
| IL6 Sandarc ABS 490nm | pg/ml   |
| 0,06                  | 0,00    |
| 0,10                  | 24,10   |
| 0,14                  | 63,30   |
| 0,42                  | 271,00  |
| 0,96                  | 591,00  |
| 2,92                  | 1878,00 |

| pg/ml | NT-Cells | LPS<br>10ng/ml | Alg0,5µg/<br>ml+LPS<br>10ng/ml | Alg<br>0.5µg/ml | Alg<br>0,1µg/ml | Vehicle<br>Control |
|-------|----------|----------------|--------------------------------|-----------------|-----------------|--------------------|
|       | 11,74601 | 1087,243       | 137,3765                       | 87,67798        | 18,88907        | 30,47141           |
|       | 22,50883 | 987,1404       | 123,5507                       | 90,64558        | 19,74949        | 8,369235           |
|       | 13,33057 | 804,7752       | 141,2865                       | 101,3392        | 15,90765        | 9,637947           |

Figure 8a

| MDA-MB231 | Control     | Algosome 0,5µg/mL | Algosome 1µg/mL | Algosome 2µg/mL | Oxidant Agent (TBH 250µM) | Oxidant agent + Algosome 0,5µg/mL | Oxidant Agent + Algosome 1µg/mL | Oxidant Agent+ Algosome 2µg/mL |
|-----------|-------------|-------------------|-----------------|-----------------|---------------------------|-----------------------------------|---------------------------------|--------------------------------|
|           | 119,6737586 | 99,8997894        | 116,6303104     | 98,99979        | 256,4639                  | 91,76036                          | 71,09714                        | 78,86605                       |
|           | 119,4805197 | 116,98282         | 110,8498127     | 86,98599        | 239,0124                  | 91,80056                          | 73,55229                        | 79,31785                       |
|           | 107,0232111 | 111,87487         | 110,9461528     | 96,8282         | 240,5634                  | 100,4445                          | 80,42446                        | 67,12312                       |
| mean      | 115,3924965 | 109,585826        | 112,8087586     | 94,27133        | 245,3466                  | 94,66847                          | 75,02463                        | 75,10234                       |
| SD        | 7,248657669 | 8,76853891        | 3,309911451     | 6,402036        | 9,659116                  | 5,002218                          | 4,834827                        | 6,913901                       |

| 1-7HB2 | Control     | Algosome 0,5µg/mL | Algosome 1µg/mL | Algosome 2µg/mL | Oxidant Agent (TBH 250µM) | Oxidant agent + Algosome 0,5µg/mL | Oxidant Agent + Algosome 1µg/mL | Oxidant Agent+ Algosome 2µg/mL |
|--------|-------------|-------------------|-----------------|-----------------|---------------------------|-----------------------------------|---------------------------------|--------------------------------|
|        | 103,9824997 | 92,2933192        | 98,42039044     | 103,1574        | 273,1114                  | 100,9515                          | 85,78386                        | 82,64315                       |
|        | 109,9748732 | 108,681774        | 104,6712529     | 81,22813        | 302,0415                  | 114,4644                          | 94,11732                        | 98,14256                       |
|        | 117,5185105 | 97,5036941        | 100,0781161     | 94,05378        | 302,0415                  | 112,7426                          | 102,7109                        | 89,6708                        |
| mean   | 110,4919611 | 99,4929289        | 101,0565865     | 92,8131         | 292,3981                  | 109,3862                          | 94,20402                        | 90,15217                       |
| SD     | 6,782804145 | 8,37335959        | 3,238267066     | 11,01716        | 16,70277                  | 7,35523                           | 8,463852                        | 7,760907                       |

Figure 8b

|     |        | <b>AKR1C2</b>      |               |                                       |
|-----|--------|--------------------|---------------|---------------------------------------|
|     | 1-7HB2 | 2µg/mL<br>Algosome | Oxidant agent | Oxidant agent<br>+ 2µg/mL<br>Algosome |
| FC1 | 1      | 0,8317             | 7,473521      | 5,857188                              |
| FC2 | 1      | 1,126299           | 7,732094      | 5,992765                              |
| FC3 | 1      | 0,832001           | 8,794384      | 4,440047                              |

|     |        | <b>FTH1</b>        |                  |                                          |
|-----|--------|--------------------|------------------|------------------------------------------|
|     | 1-7HB2 | 2µg/mL<br>Algosome | Oxidant<br>agent | Oxidant<br>agent +<br>2µg/mL<br>Algosome |
| FC1 | 1      | 0,5                | 2,88             | 1,014843                                 |
| FC2 | 1      | 0,48               | 2,88             | 0,889339                                 |
| FC3 | 1      | 0,51               | 2,87             | 1,005817                                 |

figure 8c

|     |        | <b>ALOX 12</b>     |               |                                       |
|-----|--------|--------------------|---------------|---------------------------------------|
|     | 1-7HB2 | 2µg/mL<br>Algosome | Oxidant agent | Oxidant agent<br>+ 2µg/mL<br>Algosome |
| FC1 | 1      | 1,126972           | 8,04          | 5,578775                              |
| FC2 | 1      | 0,836637           | 8,07          | 3,480174                              |
| FC3 | 1      | 0,916391           | 7,82          | 5,641051                              |

|     |        | <b>NOS 2</b>       |               |                                       |
|-----|--------|--------------------|---------------|---------------------------------------|
|     | 1-7HB2 | 2µg/mL<br>Algosome | Oxidant agent | Oxidant agent<br>+ 2µg/mL<br>Algosome |
| FC1 | 1      | 0,89               | 8,026921      | 2,270928                              |
| FC2 | 1      | 0,86               | 7,160684      | 5,159079                              |
| FC3 | 1      | 0,94               | 8,152395      | 7,869993                              |

Figure 8d

|     |        | <b>CAT</b>         |               |                                       |
|-----|--------|--------------------|---------------|---------------------------------------|
|     | 1-7HB2 | 2µg/mL<br>Algosome | Oxidant agent | Oxidant agent<br>+ 2µg/mL<br>Algosome |
| FC1 | 1      | 1,03               | 9,1           | 5,65                                  |
| FC2 | 1      | 0,73               | 6,56          | 7,14                                  |
| FC3 | 1      | 1,01               | 8,2           | 3,31                                  |

|     |        | <b>GPX1</b>        |               |                                       |
|-----|--------|--------------------|---------------|---------------------------------------|
|     | 1-7HB2 | 2µg/mL<br>Algosome | Oxidant agent | Oxidant agent<br>+ 2µg/mL<br>Algosome |
| FC1 | 1      | 1,27               | 2,27          | 1,24                                  |
| FC2 | 1      | 1,27               | 2,2           | 1,82                                  |
| FC3 | 1      | 1,32               | 2,1           | 0,43                                  |

|     |        | <b>GSR</b>         |               |                                       |
|-----|--------|--------------------|---------------|---------------------------------------|
|     | 1-7HB2 | 2µg/mL<br>Algosome | Oxidant agent | Oxidant agent<br>+ 2µg/mL<br>Algosome |
| FC1 | 1      | 0,61               | 2,27          | 0,27                                  |
| FC2 | 1      | 0,87               | 2,2           | 0,37                                  |
| FC3 | 1      | 0,1                | 2,1           | 0,47                                  |



Figure 8e

**%of moving animals after treatment with H2O2**

**data used for graph**

% of moving untreated animals

| mock | Algosome | NAC |
|------|----------|-----|
| 100  | 100      | 100 |
| 100  | 100      | 100 |
| 100  | 100      | 100 |

| % of moving animals after treatment with H2O2 |          |      |
|-----------------------------------------------|----------|------|
| mock                                          | Algosome | NAC  |
| 6,7                                           | 10       | 12,5 |
| 0                                             | 23,3     | 15,4 |
| 0                                             | 21,4     | 11,7 |
| 0                                             | 17,2     | 14,3 |
| 7,9                                           | 17,8     | 16,7 |
| 6,4                                           | 30,8     | 10   |

**raw data**

| untreated      |             |                |             |                |             |
|----------------|-------------|----------------|-------------|----------------|-------------|
| mock           |             | Algosome       |             | NAC            |             |
| moving animals | tot animals | moving animals | tot animals | moving animals | tot animals |
| 27             | 27          | 25             | 25          | 33             | 33          |
| 26             | 26          | 34             | 34          | 29             | 29          |
| 29             | 29          | 29             | 29          | 28             | 28          |

| H2O2           |             |                     |                |             |                     |                |             |                     |
|----------------|-------------|---------------------|----------------|-------------|---------------------|----------------|-------------|---------------------|
| mock           |             |                     | Algosome       |             |                     | NAC            |             |                     |
| moving animals | tot animals | % of moving animals | moving animals | tot animals | % of moving animals | moving animals | tot animals | % of moving animals |
| 2              | 30          | 6,7                 | 3              | 30          | 10                  | 3              | 24          | 12,5                |
| 0              | 35          | 0                   | 7              | 30          | 23,3                | 4              | 26          | 15,4                |
| 0              | 32          | 0                   | 6              | 28          | 21,4                | 4              | 34          | 11,7                |

|   |    |     |   |    |      |   |    |      |
|---|----|-----|---|----|------|---|----|------|
| 0 | 32 | 0   | 5 | 29 | 17,2 | 3 | 21 | 14,3 |
| 3 | 38 | 7,9 | 5 | 28 | 17,8 | 5 | 30 | 16,7 |
| 2 | 31 | 6,4 | 8 | 26 | 30,8 | 3 | 30 | 10   |

each row represents a replicate

Figure 8f

**data used for graph**  
**Quantification of *gst-4* fluorescence**

| mock     | Algosome |
|----------|----------|
| 293,274  | 231,061  |
| 472,456  | 248,671  |
| 556,321  | 203,135  |
| 411,1225 | 287,473  |
| 422,799  | 241,206  |
| 506,475  | 344,869  |
| 425,4095 | 286,619  |
| 315,5515 | 380,009  |
| 265,5197 | 312,763  |
| 316,074  | 213,2287 |
| 362,619  | 314,234  |
| 318,421  | 382,041  |
| 298,5199 | 387,592  |
| 340,19   | 347,215  |
| 300,81   | 313,8307 |
| 304,845  | 342,765  |
| 324,907  | 377,707  |
| 329,732  | 247,46   |

boxers divide replicates

CTF = Integrated Density – (Area of selected cell X Mean fluorescence of background readings)

**raw data from image J**

mock

|            | area  | mean     | sd    | intden   | CTF |
|------------|-------|----------|-------|----------|-----|
| photo 1    | 412   | 0.712    |       | 1.547    | 293 |
| background | 1.969 | 0        | 0.000 | 0.000    |     |
| photo 2    | 636   | 0.743    |       | 1.865    | 472 |
| background | 2.578 | 0        | 0.000 | 0.000    |     |
| photo 3    | 400   | 1.390    |       | 2.768    | 556 |
| background | 1.436 | 0        | 0.000 | 0.000    |     |
| photo 4    | 405   | 1.156    |       | 2.376    | 468 |
| background | 1.377 | 1,40E-01 | 0.012 | 1,93E-01 |     |
| photo 5    | 560   | 0.755    |       | 1.895    | 423 |
| background | 2.701 | 0        | 0.000 | 0.000    |     |
| photo 6    | 590   | 0.859    |       | 2.070    | 506 |
| background | 2.981 | 0        | 0.000 | 0.000    |     |
| photo 7    | 550   | 0.776    |       | 1.858    | 427 |
| background | 5.273 | 0,002    | 0.043 | 0.010    |     |
| photo 8    | 347   | 0.925    |       | 1.715    | 321 |
| background | 1.128 | 0,016    | 0.126 | 0.018    |     |
| photo 9    | 367   | 0.880    |       | 1.661    | 323 |
| background | 1.233 | 1,57E-01 | 0.013 | 1,93E-01 |     |

each row represent the  
CTF of 5 animals  
acquired in one picture

|            |       |          |       |          |          |
|------------|-------|----------|-------|----------|----------|
| photo 10   | 336   | 0.939    | 1.867 | 316      | 316,0740 |
| background | 0.921 | 0        | 0.000 | 0.000    |          |
| photo 11   | 485   | 0.748    | 1.658 | 363      | 362,6190 |
| background | 2.115 | 0        | 0.000 | 0.000    |          |
| photo 12   | 495   | 0.644    | 1.489 | 318      | 318,4210 |
| background | 2.357 | 0        | 0.000 | 0.000    |          |
| photo 13   | 354   | 1.068    | 1.979 | 378      | 298,5199 |
| background | 0.858 | 2,25E-01 | 0.015 | 1,93E-01 |          |
| photo 14   | 391   | 0.871    | 1.789 | 340      | 340,1900 |
| background | 1.528 | 0        | 0.000 | 0.000    |          |
| photo 15   | 312   | 0.964    | 1.715 | 301      | 300,8100 |
| background | 1.188 | 0        | 0.000 | 0.000    |          |
| photo 16   | 251   | 1.217    | 1.878 | 305      | 304,8450 |
| background | 2.238 | 0        | 0.000 | 0.000    |          |
| photo 17   | 318   | 1.020    | 1.829 | 325      | 324,9070 |
| background | 1.528 | 0        | 0.000 | 0.000    |          |
| photo 18   | 344   | 0.958    | 1.821 | 330      | 329,7320 |
| background | 1.548 | 0        | 0.000 | 0.000    |          |

algsome

|            | area  | mean  | sd    | intden | CTF     |
|------------|-------|-------|-------|--------|---------|
| photo 1    | 385   | 0.601 | 1.287 | 231    | 231,061 |
| background | 4.053 | 0     | 0.000 | 0.000  |         |
| photo 2    | 321   | 0.775 | 1.384 | 249    | 248,671 |
| background | 1.076 | 0     | 0.000 | 0.000  |         |
| photo 3    | 301   | 0.676 | 1.197 | 203    | 203,135 |
| background | 1.799 | 0     | 0.000 | 0.000  |         |
| photo 4    | 304   | 0.945 | 1.594 | 287    | 287,473 |
| background | 1.038 | 0     | 0.000 | 0.000  |         |
| photo 5    | 329   | 0.732 | 1.386 | 241    | 241,206 |
| background | 1.024 | 0     | 0.000 | 0.000  |         |
| photo 6    | 566   | 0.609 | 1.495 | 345    | 344,869 |

|            |       |          |       |       |          |         |
|------------|-------|----------|-------|-------|----------|---------|
| background | 1.594 |          | 0     | 0.000 | 0.000    |         |
| photo 7    | 295   | 0.971    |       | 1.692 | 287      | 286,619 |
| background | 0.782 |          | 0     | 0.000 | 0.000    |         |
| photo 8    | 463   | 0.821    |       | 1.739 | 380      | 380     |
| background | 4.886 |          | 0     | 0.000 | 0.000    |         |
| photo 9    | 326   | 0.960    |       | 1.777 | 313      | 313     |
| background | 1.701 |          | 0     | 0.000 | 0.000    |         |
| photo 10   | 492   | 0.637    |       | 1.486 | 314      | 213     |
| background | 3.778 | 2,04E-01 | 0.014 |       | 7,72E-01 |         |
| photo 11   | 527   | 0.596    |       | 1.478 | 314      | 314     |
| background | 0.875 |          | 0     | 0.000 | 0.000    |         |
| photo 12   | 362   | 1.057    |       | 1.907 | 382      | 382     |
| background | 0.840 |          | 0     | 0.000 | 0.000    |         |
| photo 13   | 343   | 1.130    |       | 2.095 | 388      | 388     |
| background | 0.802 |          | 0     | 0.000 | 0.000    |         |
| photo 14   | 341   | 1.017    |       | 1.956 | 347      | 347     |
| background | 0.972 |          | 0     | 0.000 | 0.000    |         |
| photo 15   | 380   | 0.987    |       | 2.002 | 375      | 314     |
| background | 1.194 | 1,62E-01 | 0.013 |       | 1,93E-01 |         |
| photo 16   | 388   | 0.884    |       | 1.847 | 343      | 343     |
| background | 1.128 |          | 0     | 0.000 | 0.000    |         |
| photo 17   | 372   | 1.016    |       | 1.979 | 378      | 378     |
| background | 1.580 |          | 0     | 0.000 | 0.000    |         |
| photo 18   | 384   | 0.645    |       | 1.284 | 247      | 247     |
| background | 3.650 |          | 0     | 0.000 | 0.000    |         |

Figure 8g

each row represents the number of tharshes performed by each animal in a minute

**thrashing old and young**

| young animals |          |
|---------------|----------|
| mock          | Algosome |
| 216           | 216      |
| 212           | 220      |
| 176           | 176      |
| 216           | 220      |
| 200           | 248      |
| 220           | 140      |
| 204           | 240      |
| 152           | 216      |
| 180           | 188      |
| 164           | 152      |
| 20            | 200      |
| 152           | 172      |
| 196           | 96       |
| 152           | 12       |
| 144           | 196      |
| 144           | 136      |
| 164           | 68       |
| 164           | 152      |
| 120           | 156      |
| 128           | 184      |
| 144           | 196      |
| 192           | 188      |
| 192           | 216      |
| 120           | 84       |
| 152           | 216      |
| 76            | 168      |

| old animals |          |
|-------------|----------|
| mock        | Algosome |
| 176         | 212      |
| 92          | 76       |
| 36          | 28       |
| 68          | 64       |
| 196         | 224      |
| 116         | 144      |
| 120         | 144      |
| 176         | 132      |
| 152         | 164      |
| 196         | 212      |
| 160         | 212      |
| 20          | 52       |
| 116         | 156      |
| 228         | 140      |
| 212         | 40       |
| 80          | 168      |
| 108         | 188      |
| 48          | 208      |
| 176         | 220      |
| 112         | 164      |
| 0           | 228      |
| 220         | 208      |
| 196         | 144      |
| 220         | 200      |
| 92          | 216      |
| 168         | 196      |

graphs have been done using with raw data

boxes divide replicates

|     |     |
|-----|-----|
| 116 | 188 |
| 164 | 208 |
| 196 | 76  |
| 236 | 284 |
| 248 | 276 |
| 64  | 216 |
| 32  | 80  |
| 204 | 96  |
| 244 | 144 |
| 188 | 196 |
| 184 | 128 |
| 16  | 104 |
| 224 | 52  |
| 196 | 288 |
| 240 | 276 |
| 252 | 220 |
| 108 | 216 |
| 212 |     |
| 56  |     |
| 180 |     |
| 4   |     |

|     |     |
|-----|-----|
| 160 | 208 |
| 176 | 196 |
| 4   | 188 |
| 184 | 180 |
| 132 | 124 |
| 96  | 80  |
| 96  | 156 |
| 124 | 232 |
| 200 | 0   |
| 76  | 196 |
| 24  | 212 |
| 184 | 212 |
| 100 | 200 |
| 188 | 184 |
| 76  | 56  |
| 188 | 228 |
| 164 | 44  |
| 180 | 88  |
| 68  | 72  |
|     | 160 |
|     | 184 |
|     | 84  |
|     | 204 |
|     | 224 |
|     | 4   |
|     | 196 |
