# Supplementary material for: Extracellular vesicles from the microalga Tetraselmis chuii are biocompatible and exhibit unique bone tropism along with antioxidant and anti-inflammatory properties
Source: PubMed Central journal article supplement — Commun Biol. 2024 Aug 3;7:941. doi: 10.1038/s42003-024-06612-9 (PMC11297973; doi:10.1038/s42003-024-06612-9), 2024-08-03
Supplement: 42003_2024_6612_MOESM5_ESM.pdf [file 42003_2024_6612_MOESM5_ESM.pdf]

|    | F-algosome at 37C | EIPA    |        |        | Nystatin |         |       |
|----|-------------------|---------|--------|--------|----------|---------|-------|
|    |                   | 25 (µM) | 5 (µM) | 1 (µM) | 25 (µM)  | 10 (µM) | 5(µM) |
| 2H | 28,8              | 29,6    | 30,8   | 28,7   | 30,2     | 31,3    | 32,5  |
|    | 28,2              | 29,5    | 31,5   | 29,5   | 30,9     | 31,8    | 32,1  |
|    | 28,7              | 29,9    | 31,9   | 28,7   | 30,9     | 31      | 32,1  |
| 3H | 29,1              | 32,3    | 30,4   | 29,6   | 30,5     | 30,4    | 31,3  |
|    | 30                | 31,5    | 30,6   | 28,9   | 30,5     | 30,2    | 31,6  |
|    | 29,1              | 31,1    | 30,5   | 28,9   | 30,4     | 31      | 31,4  |

| Dynasore |         |         | (background at 37°C) | (background at 4°C) | F-algosome at 4C |
|----------|---------|---------|----------------------|---------------------|------------------|
| 80 (μM)  | 30 (μM) | 10 (μM) |                      |                     |                  |
| 25       | 27,8    | 32,3    | 21,1                 | 22,2                | 26,9             |
| 25,3     | 28,8    | 30,8    | 21,1                 | 23,7                | 26,9             |
| 25,3     | 28,1    | 32,3    | 19,1                 | 24,7                | 25,9             |
| 24,3     | 27,3    | 30,9    | 19,7                 | 21,3                | 24,7             |
| 23,9     | 26,8    | 29,7    | 20                   | 22,4                | 25,8             |
| 25       | 28      | 30,7    | 19,9                 | 22,5                | 26,6             |

| DiR labeled algosomes |                 |                                |                                |                                |                                |                                |  |  |  |
|-----------------------|-----------------|--------------------------------|--------------------------------|--------------------------------|--------------------------------|--------------------------------|--|--|--|
|                       | Bin centre (nm) | Concentration (particles / ml) |  |  |  |
|                       | 2.5             | 0                              | 0                              | 0                              | 0                              | 0                              |  |  |  |
|                       | 7.5             | 0                              | 0                              | 0                              | 0                              | 0                              |  |  |  |
|                       | 12.5            | 0                              | 0                              | 0                              | 0                              | 0                              |  |  |  |
|                       | 17.5            | 0                              | 0                              | 0                              | 0                              | 0                              |  |  |  |
|                       | 22.5            | 0                              | 0                              | 0                              | 0                              | 0                              |  |  |  |
|                       | 27.5            | 60864917                       | 65476701                       | 0                              | 2,24E+08                       | 0                              |  |  |  |
|                       | 32.5            | 2,68E+08                       | 5,89E+08                       | 0                              | 1,24E+08                       | 4,22E+08                       |  |  |  |
|                       | 37.5            | 7,55E+08                       | 1,09E+09                       | 0                              | 8,22E+08                       | 7,41E+08                       |  |  |  |
|                       | 42.5            | 1,53E+09                       | 2,48E+09                       | 5,39E+08                       | 1,41E+09                       | 1,06E+09                       |  |  |  |
|                       | 47.5            | 2,5E+09                        | 4,3E+09                        | 2,48E+09                       | 9,59E+08                       | 2,17E+09                       |  |  |  |
|                       | 52.5            | 3,63E+09                       | 5,2E+09                        | 5,22E+09                       | 2,79E+09                       | 3,2E+09                        |  |  |  |
|                       | 57.5            | 6,57E+09                       | 4,99E+09                       | 7,8E+09                        | 4,28E+09                       | 4,18E+09                       |  |  |  |
|                       | 62.5            | 8,12E+09                       | 7,24E+09                       | 9,88E+09                       | 4,98E+09                       | 5,32E+09                       |  |  |  |
|                       | 67.5            | 1,29E+10                       | 8,77E+09                       | 1,76E+10                       | 9,09E+09                       | 8,1E+09                        |  |  |  |
|                       | 72.5            | 1,97E+10                       | 8,66E+09                       | 2,2E+10                        | 1,13E+10                       | 9,32E+09                       |  |  |  |
|                       | 77.5            | 2,29E+10                       | 9,8E+09                        | 2,91E+10                       | 1E+10                          | 9,79E+09                       |  |  |  |
|                       | 82.5            | 2,47E+10                       | 1,2E+10                        | 2,94E+10                       | 1,37E+10                       | 1,42E+10                       |  |  |  |
|                       | 87.5            | 2,23E+10                       | 2,01E+10                       | 4,03E+10                       | 1,92E+10                       | 1,67E+10                       |  |  |  |
|                       | 92.5            | 2,71E+10                       | 1,55E+10                       | 4,02E+10                       | 2E+10                          | 1,66E+10                       |  |  |  |
|                       | 97.5            | 3,45E+10                       | 1,91E+10                       | 5,16E+10                       | 2,32E+10                       | 1,98E+10                       |  |  |  |
|                       | 102.5           | 3,41E+10                       | 2,05E+10                       | 4,88E+10                       | 2,43E+10                       | 2,26E+10                       |  |  |  |
|                       | 107.5           | 2,78E+10                       | 1,55E+10                       | 5,4E+10                        | 2,27E+10                       | 2,19E+10                       |  |  |  |
|                       | 112.5           | 3,62E+10                       | 1,82E+10                       | 5,81E+10                       | 1,98E+10                       | 2,8E+10                        |  |  |  |
|                       | 117.5           | 3,44E+10                       | 2,29E+10                       | 4,58E+10                       | 1,85E+10                       | 2,69E+10                       |  |  |  |
|                       | 122.5           | 2,38E+10                       | 2,29E+10                       | 5,72E+10                       | 3,22E+10                       | 2,43E+10                       |  |  |  |
|                       | 127.5           | 3,12E+10                       | 1,87E+10                       | 6E+10                          | 2,32E+10                       | 2,02E+10                       |  |  |  |
|                       | 132.5           | 3,54E+10                       | 1,93E+10                       | 7,28E+10                       | 2,79E+10                       | 2,11E+10                       |  |  |  |
|                       | 137.5           | 3,03E+10                       | 1,78E+10                       | 5,68E+10                       | 2,37E+10                       | 1,77E+10                       |  |  |  |
|                       | 142.5           | 3,13E+10                       | 2,44E+10                       | 5,77E+10                       | 1,94E+10                       | 2,12E+10                       |  |  |  |
|                       | 147.5           | 2,78E+10                       | 2,07E+10                       | 4,78E+10                       | 1,59E+10                       | 1,27E+10                       |  |  |  |
|                       | 152.5           | 1,98E+10                       | 1,46E+10                       | 4,59E+10                       | 2,2E+10                        | 2,01E+10                       |  |  |  |
|                       | 157.5           | 2,01E+10                       | 9,27E+09                       | 3,58E+10                       | 1,6E+10                        | 1,46E+10                       |  |  |  |
|                       | 162.5           | 1,81E+10                       | 1,14E+10                       | 5,05E+10                       | 7,86E+09                       | 1,89E+10                       |  |  |  |
|                       | 167.5           | 1,67E+10                       | 1,29E+10                       | 3,9E+10                        | 1,21E+10                       | 9,91E+09                       |  |  |  |

|       |          |          |          |          |          |  |  |  |
|-------|----------|----------|----------|----------|----------|--|--|--|
| 172.5 | 1,36E+10 | 1,17E+10 | 4,03E+10 | 1,07E+10 | 9,89E+09 |  |  |  |
| 177.5 | 1,21E+10 | 8,47E+09 | 3,22E+10 | 9,88E+09 | 1,34E+10 |  |  |  |
| 182.5 | 1,12E+10 | 1,35E+10 | 2E+10    | 1,73E+10 | 1,67E+10 |  |  |  |
| 187.5 | 1,63E+10 | 1,05E+10 | 2,17E+10 | 8,98E+09 | 1,61E+10 |  |  |  |
| 192.5 | 1,64E+10 | 6,39E+09 | 2,97E+10 | 1,38E+10 | 5,33E+09 |  |  |  |
| 197.5 | 8,98E+09 | 9,13E+09 | 2,26E+10 | 1,32E+10 | 1,35E+10 |  |  |  |
| 202.5 | 8,76E+09 | 1,05E+10 | 1,69E+10 | 8,12E+09 | 4,33E+09 |  |  |  |
| 207.5 | 1,3E+10  | 6E+09    | 2,5E+10  | 4,93E+09 | 1,25E+10 |  |  |  |
| 212.5 | 7,1E+09  | 8,38E+09 | 1,17E+10 | 1,29E+10 | 9,62E+09 |  |  |  |
| 217.5 | 7,4E+09  | 5,15E+09 | 1,37E+10 | 1,08E+10 | 8,41E+09 |  |  |  |
| 222.5 | 7,19E+09 | 2,25E+09 | 1,02E+10 | 1,57E+09 | 1,38E+10 |  |  |  |
| 227.5 | 6,09E+09 | 7,9E+09  | 1,01E+10 | 7,2E+09  | 7,14E+09 |  |  |  |
| 232.5 | 9,2E+09  | 4,69E+09 | 1,17E+10 | 3,78E+09 | 6,43E+09 |  |  |  |
| 237.5 | 3,62E+09 | 7,45E+09 | 1,11E+10 | 5,94E+09 | 2,62E+09 |  |  |  |
| 242.5 | 3,24E+09 | 5,37E+09 | 1,04E+10 | 4,28E+09 | 5,55E+09 |  |  |  |
| 247.5 | 1,06E+10 | 9,82E+08 | 4,61E+09 | 8,56E+09 | 1,51E+09 |  |  |  |
| 252.5 | 4,55E+09 | 1,19E+09 | 4,66E+09 | 1,32E+09 | 4,44E+09 |  |  |  |
| 257.5 | 2,63E+09 | 2,12E+09 | 5,86E+09 | 2,58E+09 | 3,59E+09 |  |  |  |
| 262.5 | 2,39E+09 | 2,27E+09 | 9E+09    | 2,61E+09 | 3,98E+09 |  |  |  |
| 267.5 | 1,01E+09 | 2,92E+09 | 1,15E+10 | 2,46E+09 | 1,33E+09 |  |  |  |
| 272.5 | 4,74E+09 | 1,62E+09 | 4,58E+09 | 1,06E+09 | 2,29E+09 |  |  |  |
| 277.5 | 2,79E+09 | 2,25E+09 | 1,47E+09 | 7,22E+08 | 1,96E+09 |  |  |  |
| 282.5 | 3,44E+09 | 2,88E+09 | 5,84E+09 | 8,63E+09 | 1,73E+09 |  |  |  |
| 287.5 | 1,33E+09 | 8,51E+08 | 9,81E+08 | 3,98E+09 | 7,41E+08 |  |  |  |
| 292.5 | 4,04E+09 | 2,96E+09 | 4,19E+09 | 2,74E+08 | 2,54E+09 |  |  |  |
| 297.5 | 2,62E+09 | 1,51E+09 | 2,53E+09 | 3,73E+08 | 1,15E+09 |  |  |  |
| 302.5 | 2,41E+09 | 0        | 4,66E+08 | 1,76E+09 | 0        |  |  |  |
| 307.5 | 2,56E+08 | 2,08E+09 | 2,3E+09  | 4,48E+08 | 1,93E+09 |  |  |  |
| 312.5 | 2,31E+08 | 7,33E+08 | 4,17E+09 | 2,71E+09 | 3,18E+09 |  |  |  |
| 317.5 | 1,83E+08 | 1,15E+09 | 6,62E+08 | 6,1E+08  | 2,33E+09 |  |  |  |
| 322.5 | 3,19E+09 | 0        | 1,32E+09 | 3,46E+09 | 0        |  |  |  |
| 327.5 | 8,76E+08 | 1,58E+09 | 3,92E+08 | 1,98E+09 | 1,3E+09  |  |  |  |
| 332.5 | 1,69E+09 | 8,51E+08 | 1,69E+09 | 1,64E+09 | 4,73E+08 |  |  |  |
| 337.5 | 4,02E+08 | 1,35E+09 | 0        | 4,85E+08 | 6,65E+08 |  |  |  |
| 342.5 | 1,16E+09 | 8,12E+08 | 2,45E+09 | 4,85E+08 | 1,28E+09 |  |  |  |
| 347.5 | 1,02E+09 | 1,77E+09 | 1,15E+09 | 2,12E+08 | 1,65E+09 |  |  |  |
| 352.5 | 1,69E+09 | 5,37E+08 | 0        | 1,24E+09 | 1,28E+09 |  |  |  |
| 357.5 | 9,74E+08 | 2,1E+08  | 1,67E+09 | 4,85E+08 | 0        |  |  |  |
| 362.5 | 0        | 1,7E+09  | 0        | 3,11E+08 | 2,17E+08 |  |  |  |
| 367.5 | 1,56E+09 | 5,76E+08 | 0        | 7,22E+08 | 0        |  |  |  |
| 372.5 | 0        | 0        | 0        | 0        | 0        |  |  |  |

|       |          |          |          |          |          |  |  |  |
|-------|----------|----------|----------|----------|----------|--|--|--|
| 377.5 | 0        | 0        | 0        | 0        | 0        |  |  |  |
| 382.5 | 2,19E+08 | 0        | 1,72E+09 | 2,86E+08 | 3,07E+08 |  |  |  |
| 387.5 | 0        | 0        | 0        | 1,56E+09 | 1,27E+09 |  |  |  |
| 392.5 | 2,56E+08 | 0        | 0        | 0        | 0        |  |  |  |
| 397.5 | 0        | 0        | 2,45E+09 | 1,24E+09 | 0        |  |  |  |
| 402.5 | 0        | 0        | 2,45E+09 | 0        | 0        |  |  |  |
| 407.5 | 2,31E+08 | 0        | 7,11E+08 | 1,18E+09 | 0        |  |  |  |
| 412.5 | 0        | 0        | 0        | 1,62E+09 | 0        |  |  |  |
| 417.5 | 2,8E+08  | 1,24E+09 | 0        | 0        | 9,84E+08 |  |  |  |
| 422.5 | 2,56E+08 | 9,04E+08 | 0        | 0        | 0        |  |  |  |
| 427.5 | 0        | 0        | 0        | 0        | 0        |  |  |  |
| 432.5 | 6,09E+08 | 2,49E+08 | 0        | 4,23E+08 | 0        |  |  |  |
| 437.5 | 0        | 0        | 7,36E+08 | 0        | 3,96E+08 |  |  |  |
| 442.5 | 0        | 0        | 0        | 0        | 0        |  |  |  |
| 447.5 | 0        | 0        | 0        | 0        | 0        |  |  |  |
| 452.5 | 9,86E+08 | 0        | 0        | 0        | 0        |  |  |  |
| 457.5 | 1,1E+09  | 0        | 1,94E+09 | 0        | 0        |  |  |  |
| 462.5 | 0        | 4,71E+08 | 0        | 0        | 0        |  |  |  |
| 467.5 | 6,7E+08  | 0        | 0        | 0        | 0        |  |  |  |
| 472.5 | 0        | 0        | 0        | 0        | 0        |  |  |  |
| 477.5 | 1,22E+09 | 3,54E+08 | 0        | 0        | 0        |  |  |  |
| 482.5 | 0        | 1,05E+09 | 2,45E+09 | 0        | 0        |  |  |  |
| 487.5 | 1,22E+09 | 0        | 0        | 0        | 0        |  |  |  |
| 492.5 | 0        | 0        | 9,32E+08 | 0        | 0        |  |  |  |
| 497.5 | 0        | 5,5E+08  | 0        | 0        | 0        |  |  |  |
| 502.5 | 0        | 3,27E+08 | 0        | 0        | 0        |  |  |  |
| 507.5 | 0        | 3,27E+08 | 0        | 0        | 0        |  |  |  |
| 512.5 | 0        | 0        | 0        | 0        | 0        |  |  |  |
| 517.5 | 0        | 1,31E+09 | 0        | 0        | 0        |  |  |  |
| 522.5 | 0        | 0        | 0        | 0        | 0        |  |  |  |
| 527.5 | 0        | 5,11E+08 | 1,79E+09 | 0        | 0        |  |  |  |
| 532.5 | 0        | 0        | 0        | 8,34E+08 | 0        |  |  |  |
| 537.5 | 0        | 0        | 0        | 0        | 0        |  |  |  |
| 542.5 | 0        | 0        | 0        | 0        | 0        |  |  |  |
| 547.5 | 0        | 0        | 0        | 0        | 0        |  |  |  |
| 552.5 | 5,72E+08 | 0        | 0        | 0        | 0        |  |  |  |
| 557.5 | 0        | 0        | 0        | 0        | 0        |  |  |  |
| 562.5 | 0        | 0        | 0        | 0        | 0        |  |  |  |
| 567.5 | 0        | 0        | 1,59E+09 | 0        | 0        |  |  |  |
| 572.5 | 0        | 0        | 0        | 0        | 0        |  |  |  |
| 577.5 | 0        | 0        | 0        | 0        | 0        |  |  |  |

|       |          |   |   |          |   |  |  |
|-------|----------|---|---|----------|---|--|--|
| 582.5 | 0        | 0 | 0 | 0        | 0 |  |  |
| 587.5 | 0        | 0 | 0 | 0        | 0 |  |  |
| 592.5 | 0        | 0 | 0 | 0        | 0 |  |  |
| 597.5 | 0        | 0 | 0 | 0        | 0 |  |  |
| 602.5 | 0        | 0 | 0 | 0        | 0 |  |  |
| 607.5 | 0        | 0 | 0 | 0        | 0 |  |  |
| 612.5 | 0        | 0 | 0 | 0        | 0 |  |  |
| 617.5 | 0        | 0 | 0 | 0        | 0 |  |  |
| 622.5 | 0        | 0 | 0 | 0        | 0 |  |  |
| 627.5 | 0        | 0 | 0 | 0        | 0 |  |  |
| 632.5 | 0        | 0 | 0 | 0        | 0 |  |  |
| 637.5 | 0        | 0 | 0 | 0        | 0 |  |  |
| 642.5 | 0        | 0 | 0 | 0        | 0 |  |  |
| 647.5 | 0        | 0 | 0 | 4,11E+08 | 0 |  |  |
| 652.5 | 0        | 0 | 0 | 0        | 0 |  |  |
| 657.5 | 0        | 0 | 0 | 0        | 0 |  |  |
| 662.5 | 0        | 0 | 0 | 0        | 0 |  |  |
| 667.5 | 0        | 0 | 0 | 0        | 0 |  |  |
| 672.5 | 0        | 0 | 0 | 0        | 0 |  |  |
| 677.5 | 0        | 0 | 0 | 0        | 0 |  |  |
| 682.5 | 0        | 0 | 0 | 0        | 0 |  |  |
| 687.5 | 0        | 0 | 0 | 0        | 0 |  |  |
| 692.5 | 0        | 0 | 0 | 0        | 0 |  |  |
| 697.5 | 0        | 0 | 0 | 0        | 0 |  |  |
| 702.5 | 0        | 0 | 0 | 0        | 0 |  |  |
| 707.5 | 0        | 0 | 0 | 0        | 0 |  |  |
| 712.5 | 0        | 0 | 0 | 0        | 0 |  |  |
| 717.5 | 1,22E+09 | 0 | 0 | 0        | 0 |  |  |
| 722.5 | 0        | 0 | 0 | 0        | 0 |  |  |
| 727.5 | 0        | 0 | 0 | 0        | 0 |  |  |
| 732.5 | 0        | 0 | 0 | 0        | 0 |  |  |
| 737.5 | 0        | 0 | 0 | 0        | 0 |  |  |
| 742.5 | 0        | 0 | 0 | 0        | 0 |  |  |
| 747.5 | 0        | 0 | 0 | 0        | 0 |  |  |
| 752.5 | 0        | 0 | 0 | 0        | 0 |  |  |
| 757.5 | 0        | 0 | 0 | 0        | 0 |  |  |
| 762.5 | 0        | 0 | 0 | 0        | 0 |  |  |
| 767.5 | 0        | 0 | 0 | 0        | 0 |  |  |
| 772.5 | 0        | 0 | 0 | 0        | 0 |  |  |
| 777.5 | 0        | 0 | 0 | 0        | 0 |  |  |
| 782.5 | 0        | 0 | 0 | 0        | 0 |  |  |

|       |          |          |   |   |   |  |  |
|-------|----------|----------|---|---|---|--|--|
| 787.5 | 0        | 0        | 0 | 0 | 0 |  |  |
| 792.5 | 0        | 0        | 0 | 0 | 0 |  |  |
| 797.5 | 4,99E+08 | 0        | 0 | 0 | 0 |  |  |
| 802.5 | 0        | 0        | 0 | 0 | 0 |  |  |
| 807.5 | 0        | 0        | 0 | 0 | 0 |  |  |
| 812.5 | 0        | 0        | 0 | 0 | 0 |  |  |
| 817.5 | 0        | 0        | 0 | 0 | 0 |  |  |
| 822.5 | 0        | 0        | 0 | 0 | 0 |  |  |
| 827.5 | 0        | 0        | 0 | 0 | 0 |  |  |
| 832.5 | 0        | 0        | 0 | 0 | 0 |  |  |
| 837.5 | 0        | 0        | 0 | 0 | 0 |  |  |
| 842.5 | 0        | 0        | 0 | 0 | 0 |  |  |
| 847.5 | 0        | 0        | 0 | 0 | 0 |  |  |
| 852.5 | 0        | 0        | 0 | 0 | 0 |  |  |
| 857.5 | 0        | 0        | 0 | 0 | 0 |  |  |
| 862.5 | 0        | 0        | 0 | 0 | 0 |  |  |
| 867.5 | 0        | 0        | 0 | 0 | 0 |  |  |
| 872.5 | 0        | 0        | 0 | 0 | 0 |  |  |
| 877.5 | 0        | 0        | 0 | 0 | 0 |  |  |
| 882.5 | 0        | 0        | 0 | 0 | 0 |  |  |
| 887.5 | 0        | 0        | 0 | 0 | 0 |  |  |
| 892.5 | 0        | 0        | 0 | 0 | 0 |  |  |
| 897.5 | 0        | 0        | 0 | 0 | 0 |  |  |
| 902.5 | 0        | 0        | 0 | 0 | 0 |  |  |
| 907.5 | 0        | 0        | 0 | 0 | 0 |  |  |
| 912.5 | 0        | 0        | 0 | 0 | 0 |  |  |
| 917.5 | 0        | 1,31E+09 | 0 | 0 | 0 |  |  |
| 922.5 | 0        | 0        | 0 | 0 | 0 |  |  |
| 927.5 | 0        | 0        | 0 | 0 | 0 |  |  |
| 932.5 | 0        | 0        | 0 | 0 | 0 |  |  |
| 937.5 | 0        | 0        | 0 | 0 | 0 |  |  |
| 942.5 | 0        | 0        | 0 | 0 | 0 |  |  |
| 947.5 | 0        | 0        | 0 | 0 | 0 |  |  |
| 952.5 | 0        | 0        | 0 | 0 | 0 |  |  |
| 957.5 | 0        | 0        | 0 | 0 | 0 |  |  |
| 962.5 | 0        | 0        | 0 | 0 | 0 |  |  |
| 967.5 | 0        | 0        | 0 | 0 | 0 |  |  |
| 972.5 | 0        | 0        | 0 | 0 | 0 |  |  |
| 977.5 | 0        | 0        | 0 | 0 | 0 |  |  |
| 982.5 | 0        | 0        | 0 | 0 | 0 |  |  |
| 987.5 | 0        | 0        | 0 | 0 | 0 |  |  |





|  | not<br>labeled<br>algorithms |                                      |                                      |                                      |                                      |                                      |  |  |  |
|--|------------------------------|--------------------------------------|--------------------------------------|--------------------------------------|--------------------------------------|--------------------------------------|--|--|--|
|  | Bin centre<br>(nm)           | Concentration<br>(particles<br>/ ml) |  |  |  |
|  | 2.5                          | 0                                    | 0                                    | 0                                    | 0                                    | 0                                    |  |  |  |
|  | 7.5                          | 0                                    | 0                                    | 0                                    | 0                                    | 0                                    |  |  |  |
|  | 12.5                         | 0                                    | 0                                    | 0                                    | 0                                    | 0                                    |  |  |  |
|  | 17.5                         | 0                                    | 0                                    | 0                                    | 0                                    | 0                                    |  |  |  |
|  | 22.5                         | 0                                    | 0                                    | 0                                    | 0                                    | 0                                    |  |  |  |
|  | 27.5                         | 5,7E+07                              | 0                                    | 0                                    | 0                                    | 0                                    |  |  |  |
|  | 32.5                         | 5,7E+07                              | 1,1E+08                              | 0                                    | 5,5E+07                              | 1,7E+08                              |  |  |  |
|  | 37.5                         | 5E+08                                | 3,2E+08                              | 4E+08                                | 1,9E+08                              | 1,2E+08                              |  |  |  |
|  | 42.5                         | 7E+08                                | 7,1E+08                              | 4,2E+08                              | 4,3E+08                              | 6,8E+08                              |  |  |  |
|  | 47.5                         | 1,5E+09                              | 1,2E+09                              | 1,3E+09                              | 9,6E+08                              | 3,2E+08                              |  |  |  |
|  | 52.5                         | 2,5E+09                              | 2,2E+09                              | 1,5E+09                              | 1,8E+09                              | 1,3E+09                              |  |  |  |
|  | 57.5                         | 4,2E+09                              | 3,4E+09                              | 2,2E+09                              | 3E+09                                | 3,4E+09                              |  |  |  |
|  | 62.5                         | 5E+09                                | 5,7E+09                              | 5E+09                                | 4,3E+09                              | 2,9E+09                              |  |  |  |
|  | 67.5                         | 6,3E+09                              | 6,7E+09                              | 6,3E+09                              | 6,1E+09                              | 4,1E+09                              |  |  |  |
|  | 72.5                         | 7,5E+09                              | 9,7E+09                              | 9,2E+09                              | 7,4E+09                              | 6,4E+09                              |  |  |  |
|  | 77.5                         | 1,3E+10                              | 1,2E+10                              | 1,2E+10                              | 1E+10                                | 8,9E+09                              |  |  |  |
|  | 82.5                         | 1,5E+10                              | 1,6E+10                              | 1,7E+10                              | 1,7E+10                              | 1,1E+10                              |  |  |  |
|  | 87.5                         | 1,8E+10                              | 1,8E+10                              | 1,7E+10                              | 1,8E+10                              | 1,3E+10                              |  |  |  |
|  | 92.5                         | 2,7E+10                              | 2,7E+10                              | 2,3E+10                              | 2,6E+10                              | 1,8E+10                              |  |  |  |
|  | 97.5                         | 2,8E+10                              | 3,1E+10                              | 2,4E+10                              | 2,6E+10                              | 2,1E+10                              |  |  |  |
|  | 102.5                        | 3,5E+10                              | 3,4E+10                              | 3,6E+10                              | 2,8E+10                              | 3E+10                                |  |  |  |
|  | 107.5                        | 4E+10                                | 3,6E+10                              | 3,9E+10                              | 4,1E+10                              | 3,2E+10                              |  |  |  |
|  | 112.5                        | 4,4E+10                              | 4E+10                                | 3,5E+10                              | 2,9E+10                              | 3,5E+10                              |  |  |  |
|  | 117.5                        | 3,7E+10                              | 3,4E+10                              | 3,7E+10                              | 3,2E+10                              | 3E+10                                |  |  |  |
|  | 122.5                        | 4,8E+10                              | 4,3E+10                              | 4,4E+10                              | 3,4E+10                              | 2,5E+10                              |  |  |  |
|  | 127.5                        | 4,4E+10                              | 3,7E+10                              | 4,4E+10                              | 4,3E+10                              | 3,3E+10                              |  |  |  |
|  | 132.5                        | 3,2E+10                              | 4E+10                                | 3,6E+10                              | 4,4E+10                              | 3,3E+10                              |  |  |  |
|  | 137.5                        | 3,9E+10                              | 3,9E+10                              | 3,4E+10                              | 3,1E+10                              | 2,1E+10                              |  |  |  |
|  | 142.5                        | 4,6E+10                              | 3,7E+10                              | 4E+10                                | 3,1E+10                              | 2,6E+10                              |  |  |  |
|  | 147.5                        | 4,2E+10                              | 3,7E+10                              | 3,7E+10                              | 3E+10                                | 2,6E+10                              |  |  |  |
|  | 152.5                        | 3,5E+10                              | 3,4E+10                              | 3,5E+10                              | 3,4E+10                              | 2,5E+10                              |  |  |  |
|  | 157.5                        | 3,7E+10                              | 3,1E+10                              | 3E+10                                | 2,9E+10                              | 1,9E+10                              |  |  |  |
|  | 162.5                        | 2,4E+10                              | 2,7E+10                              | 3,7E+10                              | 2,8E+10                              | 2,7E+10                              |  |  |  |
|  | 167.5                        | 3,2E+10                              | 2,4E+10                              | 1,8E+10                              | 2E+10                                | 1,5E+10                              |  |  |  |

|       |         |         |         |         |         |  |  |  |
|-------|---------|---------|---------|---------|---------|--|--|--|
| 172.5 | 3E+10   | 1,9E+10 | 3,1E+10 | 2,7E+10 | 2,1E+10 |  |  |  |
| 177.5 | 3,2E+10 | 2,3E+10 | 2,6E+10 | 2,1E+10 | 1,4E+10 |  |  |  |
| 182.5 | 2,5E+10 | 2,7E+10 | 2,7E+10 | 2E+10   | 1,5E+10 |  |  |  |
| 187.5 | 2,9E+10 | 1,9E+10 | 1,9E+10 | 3E+10   | 1,7E+10 |  |  |  |
| 192.5 | 2,3E+10 | 2,2E+10 | 2,3E+10 | 2,1E+10 | 1,3E+10 |  |  |  |
| 197.5 | 1,7E+10 | 1,3E+10 | 1,8E+10 | 1,3E+10 | 1,6E+10 |  |  |  |
| 202.5 | 2E+10   | 1,9E+10 | 1,7E+10 | 1,5E+10 | 9,3E+09 |  |  |  |
| 207.5 | 1,3E+10 | 1,5E+10 | 1,4E+10 | 1,6E+10 | 1,3E+10 |  |  |  |
| 212.5 | 1,5E+10 | 1,3E+10 | 1,9E+10 | 1,4E+10 | 1,1E+10 |  |  |  |
| 217.5 | 1,6E+10 | 1,1E+10 | 1,8E+10 | 1,3E+10 | 1,3E+10 |  |  |  |
| 222.5 | 1,2E+10 | 9,5E+09 | 6,1E+09 | 1,7E+10 | 6,7E+09 |  |  |  |
| 227.5 | 1,2E+10 | 1,1E+10 | 1,4E+10 | 6,2E+09 | 1,1E+10 |  |  |  |
| 232.5 | 1,5E+10 | 1,5E+10 | 1,6E+10 | 4,6E+09 | 7,2E+09 |  |  |  |
| 237.5 | 5,7E+09 | 4,5E+09 | 6,1E+09 | 7,7E+09 | 1,4E+10 |  |  |  |
| 242.5 | 8,3E+09 | 1,2E+10 | 6,1E+09 | 1,1E+10 | 1,3E+10 |  |  |  |
| 247.5 | 9,1E+09 | 5,3E+09 | 1,1E+10 | 7,6E+09 | 8,1E+09 |  |  |  |
| 252.5 | 1,1E+10 | 6,6E+09 | 5,7E+09 | 7,8E+09 | 6,8E+09 |  |  |  |
| 257.5 | 3,5E+09 | 5,7E+09 | 6,7E+09 | 1E+10   | 9,6E+09 |  |  |  |
| 262.5 | 9,4E+09 | 3,9E+09 | 4,9E+09 | 4,1E+09 | 6,3E+09 |  |  |  |
| 267.5 | 7,3E+09 | 2,6E+09 | 5E+09   | 7,9E+09 | 6,4E+09 |  |  |  |
| 272.5 | 3E+09   | 7,7E+08 | 3,1E+09 | 2,7E+09 | 4,3E+09 |  |  |  |
| 277.5 | 4E+09   | 5E+09   | 5,3E+09 | 5,9E+09 | 5,8E+09 |  |  |  |
| 282.5 | 3E+09   | 5,4E+09 | 4,3E+09 | 5,1E+09 | 2,3E+09 |  |  |  |
| 287.5 | 3,7E+09 | 2E+09   | 2,2E+09 | 2,4E+09 | 5,1E+09 |  |  |  |
| 292.5 | 8,1E+09 | 4,7E+09 | 3,2E+09 | 1,9E+09 | 4,5E+09 |  |  |  |
| 297.5 | 1,2E+09 | 3,9E+09 | 4E+09   | 4,3E+09 | 1,8E+09 |  |  |  |
| 302.5 | 6,3E+09 | 3,7E+09 | 4,9E+08 | 1,6E+09 | 2,7E+09 |  |  |  |
| 307.5 | 4,4E+09 | 6,4E+09 | 1,4E+09 | 2,8E+09 | 3,5E+09 |  |  |  |
| 312.5 | 1,9E+09 | 3E+09   | 4,2E+09 | 1,3E+09 | 4,3E+09 |  |  |  |
| 317.5 | 3,5E+09 | 3,3E+09 | 2,5E+09 | 2,7E+09 | 2,2E+09 |  |  |  |
| 322.5 | 1,8E+09 | 2,4E+09 | 1,6E+09 | 1,1E+09 | 3,5E+08 |  |  |  |
| 327.5 | 9,3E+08 | 9,3E+08 | 2,3E+09 | 2,4E+09 | 3,2E+09 |  |  |  |
| 332.5 | 2,2E+09 | 3,1E+09 | 4,2E+09 | 2,9E+09 | 2,8E+09 |  |  |  |
| 337.5 | 3,4E+09 | 8,7E+08 | 1,9E+09 | 3E+09   | 4,8E+09 |  |  |  |
| 342.5 | 7,2E+08 | 1,1E+09 | 1,1E+09 | 2,7E+08 | 1,1E+09 |  |  |  |
| 347.5 | 1,1E+09 | 3,4E+09 | 8,5E+08 | 7,6E+08 | 3E+09   |  |  |  |
| 352.5 | 0       | 3,3E+08 | 2,2E+09 | 1,3E+09 | 0       |  |  |  |
| 357.5 | 2,4E+09 | 2,2E+09 | 1,9E+08 | 1,9E+09 | 3,5E+09 |  |  |  |
| 362.5 | 9,1E+08 | 1,1E+09 | 1,5E+09 | 0       | 1,9E+09 |  |  |  |
| 367.5 | 2,9E+09 | 5,1E+09 | 0       | 1,6E+09 | 0       |  |  |  |
| 372.5 | 5,7E+08 | 5,9E+08 | 8,7E+08 | 3,2E+09 | 2E+09   |  |  |  |

|       |         |         |         |         |         |  |  |  |
|-------|---------|---------|---------|---------|---------|--|--|--|
| 377.5 | 3E+09   | 2,2E+09 | 2,2E+09 | 7,3E+08 | 3,9E+08 |  |  |  |
| 382.5 | 1,6E+09 | 1,6E+09 | 4,7E+08 | 1,4E+09 | 0       |  |  |  |
| 387.5 | 6,1E+08 | 0       | 0       | 3,1E+08 | 1,1E+09 |  |  |  |
| 392.5 | 1E+09   | 2,7E+09 | 7,4E+08 | 0       | 1,1E+09 |  |  |  |
| 397.5 | 1,8E+09 | 7,9E+08 | 6,3E+08 | 0       | 1,3E+09 |  |  |  |
| 402.5 | 0       | 2,5E+09 | 1,5E+09 | 2,4E+08 | 0       |  |  |  |
| 407.5 | 1,3E+09 | 2,2E+09 | 0       | 8,6E+08 | 2,3E+09 |  |  |  |
| 412.5 | 0       | 0       | 1,5E+09 | 1,1E+09 | 5,5E+08 |  |  |  |
| 417.5 | 0       | 1E+09   | 0       | 6,7E+08 | 3,9E+08 |  |  |  |
| 422.5 | 0       | 1,1E+09 | 3,7E+08 | 5,4E+08 | 2,4E+09 |  |  |  |
| 427.5 | 0       | 3E+08   | 4,3E+08 | 3,5E+08 | 0       |  |  |  |
| 432.5 | 1,1E+09 | 1,1E+09 | 8,7E+08 | 0       | 0       |  |  |  |
| 437.5 | 0       | 0       | 0       | 5,7E+08 | 1,6E+09 |  |  |  |
| 442.5 | 6,2E+08 | 0       | 2,2E+09 | 0       | 0       |  |  |  |
| 447.5 | 0       | 5,6E+08 | 0       | 0       | 8E+08   |  |  |  |
| 452.5 | 0       | 0       | 0       | 9,7E+08 | 2E+09   |  |  |  |
| 457.5 | 0       | 1,1E+09 | 2,9E+08 | 0       | 0       |  |  |  |
| 462.5 | 0       | 0       | 3,8E+08 | 1,4E+09 | 0       |  |  |  |
| 467.5 | 0       | 0       | 0       | 4,5E+08 | 1E+09   |  |  |  |
| 472.5 | 0       | 0       | 1,1E+09 | 0       | 0       |  |  |  |
| 477.5 | 0       | 0       | 0       | 0       | 0       |  |  |  |
| 482.5 | 0       | 1,3E+09 | 1,1E+09 | 0       | 0       |  |  |  |
| 487.5 | 0       | 0       | 0       | 0       | 0       |  |  |  |
| 492.5 | 0       | 1,8E+09 | 2,6E+08 | 0       | 7,4E+08 |  |  |  |
| 497.5 | 0       | 0       | 0       | 0       | 0       |  |  |  |
| 502.5 | 0       | 0       | 2,7E+08 | 0       | 8,8E+08 |  |  |  |
| 507.5 | 0       | 0       | 0       | 0       | 4,1E+08 |  |  |  |
| 512.5 | 0       | 0       | 0       | 0       | 0       |  |  |  |
| 517.5 | 0       | 0       | 0       | 0       | 0       |  |  |  |
| 522.5 | 0       | 0       | 2,8E+08 | 8E+08   | 0       |  |  |  |
| 527.5 | 0       | 0       | 1,1E+09 | 0       | 3,2E+08 |  |  |  |
| 532.5 | 1,1E+09 | 0       | 6,3E+08 | 0       | 0       |  |  |  |
| 537.5 | 0       | 4,4E+08 | 0       | 0       | 0       |  |  |  |
| 542.5 | 0       | 0       | 0       | 0       | 0       |  |  |  |
| 547.5 | 0       | 0       | 0       | 0       | 1,1E+09 |  |  |  |
| 552.5 | 0       | 0       | 0       | 0       | 0       |  |  |  |
| 557.5 | 0       | 4,4E+08 | 2,8E+08 | 3,2E+08 | 0       |  |  |  |
| 562.5 | 0       | 1,5E+09 | 0       | 0       | 0       |  |  |  |
| 567.5 | 0       | 0       | 0       | 4,6E+08 | 0       |  |  |  |
| 572.5 | 0       | 0       | 0       | 0       | 0       |  |  |  |
| 577.5 | 0       | 0       | 0       | 0       | 0       |  |  |  |

|       |         |         |         |         |         |  |  |
|-------|---------|---------|---------|---------|---------|--|--|
| 582.5 | 0       | 0       | 0       | 0       | 0       |  |  |
| 587.5 | 0       | 0       | 0       | 0       | 0       |  |  |
| 592.5 | 1,1E+09 | 0       | 1,1E+09 | 1,1E+09 | 1,1E+09 |  |  |
| 597.5 | 0       | 0       | 0       | 0       | 0       |  |  |
| 602.5 | 0       | 0       | 0       | 0       | 1,1E+09 |  |  |
| 607.5 | 0       | 0       | 0       | 0       | 1,1E+09 |  |  |
| 612.5 | 0       | 0       | 0       | 0       | 0       |  |  |
| 617.5 | 0       | 0       | 0       | 0       | 4,8E+08 |  |  |
| 622.5 | 0       | 0       | 3,9E+08 | 0       | 0       |  |  |
| 627.5 | 0       | 0       | 0       | 0       | 0       |  |  |
| 632.5 | 0       | 0       | 0       | 0       | 0       |  |  |
| 637.5 | 0       | 0       | 0       | 0       | 0       |  |  |
| 642.5 | 0       | 0       | 0       | 0       | 0       |  |  |
| 647.5 | 0       | 0       | 0       | 0       | 0       |  |  |
| 652.5 | 0       | 0       | 0       | 0       | 0       |  |  |
| 657.5 | 0       | 7,8E+08 | 1,1E+09 | 0       | 0       |  |  |
| 662.5 | 0       | 0       | 0       | 0       | 0       |  |  |
| 667.5 | 0       | 0       | 0       | 0       | 0       |  |  |
| 672.5 | 0       | 0       | 0       | 8,8E+08 | 0       |  |  |
| 677.5 | 0       | 0       | 0       | 0       | 3,8E+08 |  |  |
| 682.5 | 0       | 0       | 0       | 0       | 0       |  |  |
| 687.5 | 0       | 0       | 0       | 0       | 0       |  |  |
| 692.5 | 0       | 0       | 0       | 0       | 0       |  |  |
| 697.5 | 0       | 0       | 0       | 0       | 0       |  |  |
| 702.5 | 0       | 0       | 0       | 0       | 0       |  |  |
| 707.5 | 0       | 0       | 0       | 0       | 0       |  |  |
| 712.5 | 0       | 0       | 0       | 0       | 0       |  |  |
| 717.5 | 0       | 0       | 0       | 4,6E+08 | 0       |  |  |
| 722.5 | 0       | 0       | 0       | 0       | 0       |  |  |
| 727.5 | 0       | 0       | 0       | 0       | 0       |  |  |
| 732.5 | 0       | 0       | 0       | 0       | 0       |  |  |
| 737.5 | 0       | 0       | 0       | 0       | 0       |  |  |
| 742.5 | 0       | 0       | 0       | 0       | 0       |  |  |
| 747.5 | 0       | 0       | 0       | 0       | 0       |  |  |
| 752.5 | 0       | 0       | 0       | 0       | 0       |  |  |
| 757.5 | 0       | 0       | 0       | 0       | 0       |  |  |
| 762.5 | 0       | 0       | 0       | 0       | 0       |  |  |
| 767.5 | 0       | 0       | 0       | 0       | 0       |  |  |
| 772.5 | 0       | 0       | 0       | 0       | 0       |  |  |
| 777.5 | 0       | 0       | 0       | 0       | 0       |  |  |
| 782.5 | 0       | 0       | 0       | 0       | 0       |  |  |

|       |   |   |   |   |   |  |  |
|-------|---|---|---|---|---|--|--|
| 787.5 | 0 | 0 | 0 | 0 | 0 |  |  |
| 792.5 | 0 | 0 | 0 | 0 | 0 |  |  |
| 797.5 | 0 | 0 | 0 | 0 | 0 |  |  |
| 802.5 | 0 | 0 | 0 | 0 | 0 |  |  |
| 807.5 | 0 | 0 | 0 | 0 | 0 |  |  |
| 812.5 | 0 | 0 | 0 | 0 | 0 |  |  |
| 817.5 | 0 | 0 | 0 | 0 | 0 |  |  |
| 822.5 | 0 | 0 | 0 | 0 | 0 |  |  |
| 827.5 | 0 | 0 | 0 | 0 | 0 |  |  |
| 832.5 | 0 | 0 | 0 | 0 | 0 |  |  |
| 837.5 | 0 | 0 | 0 | 0 | 0 |  |  |
| 842.5 | 0 | 0 | 0 | 0 | 0 |  |  |
| 847.5 | 0 | 0 | 0 | 0 | 0 |  |  |
| 852.5 | 0 | 0 | 0 | 0 | 0 |  |  |
| 857.5 | 0 | 0 | 0 | 0 | 0 |  |  |
| 862.5 | 0 | 0 | 0 | 0 | 0 |  |  |
| 867.5 | 0 | 0 | 0 | 0 | 0 |  |  |
| 872.5 | 0 | 0 | 0 | 0 | 0 |  |  |
| 877.5 | 0 | 0 | 0 | 0 | 0 |  |  |
| 882.5 | 0 | 0 | 0 | 0 | 0 |  |  |
| 887.5 | 0 | 0 | 0 | 0 | 0 |  |  |
| 892.5 | 0 | 0 | 0 | 0 | 0 |  |  |
| 897.5 | 0 | 0 | 0 | 0 | 0 |  |  |
| 902.5 | 0 | 0 | 0 | 0 | 0 |  |  |
| 907.5 | 0 | 0 | 0 | 0 | 0 |  |  |
| 912.5 | 0 | 0 | 0 | 0 | 0 |  |  |
| 917.5 | 0 | 0 | 0 | 0 | 0 |  |  |
| 922.5 | 0 | 0 | 0 | 0 | 0 |  |  |
| 927.5 | 0 | 0 | 0 | 0 | 0 |  |  |
| 932.5 | 0 | 0 | 0 | 0 | 0 |  |  |
| 937.5 | 0 | 0 | 0 | 0 | 0 |  |  |
| 942.5 | 0 | 0 | 0 | 0 | 0 |  |  |
| 947.5 | 0 | 0 | 0 | 0 | 0 |  |  |
| 952.5 | 0 | 0 | 0 | 0 | 0 |  |  |
| 957.5 | 0 | 0 | 0 | 0 | 0 |  |  |
| 962.5 | 0 | 0 | 0 | 0 | 0 |  |  |
| 967.5 | 0 | 0 | 0 | 0 | 0 |  |  |
| 972.5 | 0 | 0 | 0 | 0 | 0 |  |  |
| 977.5 | 0 | 0 | 0 | 0 | 0 |  |  |
| 982.5 | 0 | 0 | 0 | 0 | 0 |  |  |
| 987.5 | 0 | 0 | 0 | 0 | 0 |  |  |



800nm IR scanner reading

|                     | FR1      | Fr2      | Fr3      | Fr4      | Fr5      | Fr6      | Fr7      | Fr8      |
|---------------------|----------|----------|----------|----------|----------|----------|----------|----------|
| Dir LABELLED-ALG    | 29,082   | 27,933   | 17,501   | 21,428   | 2,501    | 2,501    | 2,502    | 2,509    |
| Dir FREE DYE CONTRO | 2,523377 | 2,529605 | 2,526372 | 2,526837 | 2,526674 | 2,529674 | 2,530151 | 2,506612 |



|          |          |
|----------|----------|
| Fr9      | Fr10     |
| 2,501    | 2,501    |
| 2,505627 | 2,526625 |



Green Fluorescence Intensity

|     | area | Mean Intensity |     | area | Mean Intensity |
|-----|------|----------------|-----|------|----------------|
| 48h | 2099 | 465,76         | 72h | 2099 | 545,68         |
|     | 2099 | 333,53         |     | 2099 | 703,79         |
|     | 2099 | 301,69         |     | 2099 | 759,16         |
|     | 2099 | 257,83         |     | 2099 | 761,64         |
|     | 2099 | 276,16         |     | 2099 | 764,79         |

Background

| 48h | area | Mean Intensity | 72h | area | Mean Intensity |
|-----|------|----------------|-----|------|----------------|
|     | 2099 | 0,00172        |     | 2099 | 0,01965        |
|     | 2099 | 0,00234        |     | 2099 | 0,00043        |
|     | 2099 | 0,00052        |     | 2099 | 0,00135        |
|     | 2099 | 0,00081        |     | 2099 | 0,01082        |
|     | 2099 | 0,00163        |     | 2099 | 0,00155        |

| 1 exp |         |           |         |         |
|-------|---------|-----------|---------|---------|
|       | Control | 0,5 µg/ml | 1 µg/ml | 2 µg/ml |
| 24h   | 0,94    | 0,719     | 0,702   | 0,875   |
|       | 0,828   | 0,781     | 0,779   | 0,873   |
|       | 0,937   | 0,73      | 0,763   | 0,661   |
| 48h   | 1,037   | 0,927     | 0,965   | 0,831   |
|       | 0,87    | 0,985     | 0,826   | 0,905   |
|       | 0,943   | 0,903     | 0,853   | 0,74    |
| 72h   | 0,869   | 0,756     | 0,720   | 0,684   |
|       | 0,895   | 0,741     | 0,793   | 0,776   |
|       | 0,728   | 0,737     | 0,798   | 0,808   |

| 2 exp |         |           |         |
|-------|---------|-----------|---------|
|       | Control | 0,5 µg/ml | 1 µg/ml |
| 24h   | 0,857   | 0,829     | 0,801   |
|       | 0,88    | 0,824     | 0,837   |
|       | 0,986   | 0,793     | 0,886   |
| 48h   | 0,909   | 0,769     | 0,823   |
|       | 1,077   | 0,849     | 0,895   |
|       | 1,083   | 0,954     | 0,886   |
| 72h   | 0,677   | 0,650     | 0,653   |
|       | 0,796   | 0,765     | 0,701   |
|       | 0,842   | 0,756     | 0,763   |

|                |
|----------------|
|                |
| <b>2 µg/ml</b> |

0,815

0,801

0,773

0,753

0,809

0,781

0,759

0,593

0,591

DFC ex 488nm

|        | <b>Control</b> | <b>Algosom<br/>e 2µg/mL</b> | <b>Oxidant<br/>agent<br/>(H2O2)</b> | <b>Oxidant<br/>agent +<br/>Algosom<br/>e 2µg/mL</b> |
|--------|----------------|-----------------------------|-------------------------------------|-----------------------------------------------------|
| 1-7HB2 |                |                             |                                     |                                                     |
|        | 146,74         | 137,85                      | 391,545                             | 270,345                                             |
|        | 146,788        | 155,36                      | 290,815                             | 272,78                                              |
|        | 183,081        | 183,924                     | 380,344                             | 259,684                                             |

ABS 490nm

| 1-7HB2 | Control | H2O2<br>(250<br>$\mu$ M) |
|--------|---------|--------------------------|
|        | 0,42236 | 0,27618                  |
|        | 0,3942  | 0,28329                  |
|        | 0,41908 | 0,29116                  |

ABS 490nm

| 1-7HB2 | Control | TBH (250 $\mu$ M) |
|--------|---------|-------------------|
|        | 0,57458 | 0,62965           |
|        | 0,64221 | 0,72632           |
|        | 0,55599 | 0,59975           |

| MDA | Control | TBH (250 $\mu$ M) |
|-----|---------|-------------------|
|     | 0,39854 | 0,39819           |
|     | 0,42576 | 0,38594           |
|     | 0,42117 | 0,40995           |
